# Supplementary material for: Neuroinflammation in an optimized model of lysophosphatidic acid (LPA)-induced post-hemorrhagic hydrocephalus
Source: Research Square preprint supplement (doi:10.21203/rs.3.rs-6762718/v1), 2025-06-03
Supplement: Supplementary file 1 [file 068c4ac4f6360405185b5e28.xlsx]

## Sheet: README
Table S1: Compiled list of proteins measured from CSF of human patients with hydrocephalus that are up- or down-regulated relative to healthy controls

## Sheet: CSF_proteins
Protein	Up/Down	Study
APP	Up	Morales et al, 2017, Neurosurgery
CCL19	Up	Habiyaremye et al, 2017, Fluids Barriers CNS
CCL3	Up	Habiyaremye et al, 2017, Fluids Barriers CNS, Lolansen et al, 2021, Disease Markers
CXCL10	Up	Habiyaremye et al, 2017, Fluids Barriers CNS
HGF	Up	Okamoto et al, 2010, Early Human Development
IL10	Up	Habiyaremye et al, 2017, Fluids Barriers CNS, Lolansen et al, 2021, Disease Markers
IL12	Up	Habiyaremye et al, 2017, Fluids Barriers CNS
IL18	Up	Habiyaremye et al, 2017, Fluids Barriers CNS
IL1A	Up	Habiyaremye et al, 2017, Fluids Barriers CNS
IL1B	Up	Habiyaremye et al, 2017, Fluids Barriers CNS
IL4	Up	Habiyaremye et al, 2017, Fluids Barriers CNS
IL6	Up	Habiyaremye et al, 2017, Fluids Barriers CNS, Lolansen et al, 2021, Disease Markers
IL8	Up	Lolansen et al, 2021, Disease Markers
L1CAM	Up	Morales et al, 2017, Neurosurgery
MMP7	Up	Harris et al, 2021, Fluids Barriers CNS
MMP9	Up	Harris et al, 2021, Fluids Barriers CNS
NCAM	Up	Morales et al, 2017, Neurosurgery
SFAS	Up	Felderhoff-Mueser et al, 2003, Pediatric Research
SPG	Up	Krause et al, 2020, Frontiers in Pediatrics
TGFB1	Up	Habiyaremye et al, 2017, Fluids Barriers CNS
TIMP4	Down	Lolansen et al, 2021, Disease Markers
TNFA	Up	Habiyaremye et al, 2017, Fluids Barriers CNS
VEGFA	Up	Heep et al, 2004, Pediatric Research
XCL1	Down	Habiyaremye et al, 2017, Fluids Barriers CNS
