# Supplementary material for: Neuroinflammation in an optimized model of lysophosphatidic acid (LPA)-induced post-hemorrhagic hydrocephalus
Source: Research Square preprint supplement (doi:10.21203/rs.3.rs-6762718/v1), 2025-06-03
Supplement: Supplementary file 2 [file 38583879164d5d8380e4df19.xlsx]

## Sheet: README
Table S3: differential gene expression information for immune cell types
[celltype] tabs list detected genes in each cell type and their log2FC in LPA-injected brains relative to control

## Sheet: Macrophages
gene	p_val	avg_log2FC	pct.1	pct.2	p_val_adj
Mrc1	5.13376e-07	-0.586281	0.913	1	0.0126922
F13a1	4.36338e-06	-0.681831	0.804	0.968	0.107876
Rbpj	9.67144e-06	-0.703199	0.87	1	0.239107
Malat1	1.09404e-05	-0.303822	1	1	0.270478
Hexb	1.66116e-05	1.20151	0.402	0.118	0.410688
Retreg1	1.84508e-05	1.13288	0.457	0.161	0.456158
Itga6	2.68879e-05	1.16729	0.435	0.161	0.664749
Vrk2	2.72774e-05	1.00359	0.489	0.204	0.674378
Evl	4.08195e-05	0.884922	0.489	0.183	1
Apobec1	6.85374e-05	1.17466	0.446	0.183	1
Cerk	0.000100534	0.939277	0.402	0.14	1
Tgfbr1	0.00011349	1.33458	0.435	0.183	1
Gm30489	0.000122923	-0.701333	0.489	0.71	1
Ldlrad4	0.000128423	0.812174	0.728	0.409	1
Itgam	0.000171211	0.888127	0.391	0.14	1
Epb41l2	0.00018426	0.978452	0.652	0.398	1
Lrmda	0.000211076	0.715964	0.913	0.763	1
Wdpcp	0.000235463	0.903289	0.304	0.086	1
Camk1d	0.000246084	0.501373	0.946	0.785	1
Lhfpl2	0.000255948	1.19425	0.207	0.032	1
Gm2629	0.000263694	1.07775	0.185	0.022	1
Pid1	0.000285598	0.533577	0.88	0.677	1
Rapgef5	0.000338623	0.867848	0.272	0.065	1
Arhgap9	0.000389029	-0.83723	0	0.129	1
Tmcc3	0.000394903	0.582462	0.739	0.516	1
Usp48	0.000399213	0.740377	0.446	0.183	1
Hdac9	0.000493903	0.553144	0.935	0.914	1
Gtf2h2	0.000516551	0.734168	0.152	0.011	1
Fmnl3	0.000548432	0.940346	0.228	0.054	1
Nf1	0.000568164	0.671559	0.63	0.344	1
Arih1	0.000605516	0.741497	0.641	0.344	1
Usp4	0.000692386	0.571894	0.283	0.086	1
Nom1	0.000739912	0.729959	0.141	0.011	1
Camk2d	0.000838797	0.757069	0.63	0.409	1
Arid5b	0.000840488	0.749737	0.511	0.269	1
Vav3	0.000899511	-0.619578	0.576	0.742	1
Mthfsl	0.000918189	0.761835	0.141	0.011	1
Lgmn	0.000922908	0.670377	0.75	0.527	1
Tent4b	0.000952982	0.720232	0.315	0.108	1
Mypop	0.000958286	0.483292	0.141	0.011	1
Lpcat2	0.00119648	0.91782	0.326	0.129	1
Orc3	0.00124417	0.740138	0.293	0.097	1
Nmt1	0.00128479	0.813588	0.293	0.108	1
Fkbp5	0.00131668	-0.857094	0.402	0.591	1
Pros1	0.00132197	0.725999	0.304	0.108	1
Bod1l	0.00136539	0.757264	0.337	0.129	1
Cx3cr1	0.00137112	0.867451	0.467	0.247	1
Rpl27a	0.00140265	-0.677971	0.076	0.247	1
Kif1a	0.0014463	0.72332	0.152	0.022	1
Maml3	0.00148697	0.908084	0.641	0.441	1
Ttyh2	0.00150363	0.745772	0.152	0.022	1
Arhgap22	0.00151571	1.02677	0.174	0.032	1
Apbb1ip	0.00154191	0.631089	0.424	0.204	1
Wdr48	0.00159355	0.692354	0.152	0.022	1
Gab2	0.00161196	0.513601	0.88	0.71	1
Stk4	0.00165163	0.826224	0.402	0.194	1
Pmepa1	0.00166274	0.864644	0.293	0.108	1
Cd163	0.00171409	-0.564848	0.391	0.645	1
Cmss1	0.00181986	0.365097	0.989	0.935	1
Rnf180	0.00189826	0.620451	0.413	0.194	1
C1qa	0.00199495	-0.696563	0.446	0.613	1
Tcf20	0.0021674	0.594035	0.511	0.28	1
Sp1	0.00221764	0.62197	0.207	0.054	1
Ldah	0.00224155	0.642194	0.261	0.086	1
Reep5	0.00226025	-0.811057	0.109	0.28	1
Nuak1	0.00244469	0.796165	0.326	0.129	1
Stx8	0.00262621	0.762952	0.38	0.183	1
Vcp	0.00272702	0.698235	0.217	0.065	1
Pld1	0.00278444	0.44893	0.565	0.301	1
Macf1	0.00281549	0.572119	0.826	0.699	1
Abhd6	0.00286958	-0.783216	0.011	0.118	1
Peli1	0.00298325	0.607189	0.576	0.333	1
Cbwd1	0.00305572	-0.787778	0.011	0.118	1
Dock8	0.00306782	0.482216	0.837	0.591	1
Rasgef1b	0.00312824	0.696705	0.25	0.086	1
Gna12	0.00313109	0.624905	0.533	0.301	1
Eepd1	0.0031489	0.56798	0.141	0.022	1
Plaa	0.00326266	0.541371	0.207	0.054	1
Nav1	0.00335445	0.501405	0.554	0.301	1
Abca1	0.00340945	0.62222	0.804	0.677	1
Abcd3	0.00341443	0.480429	0.207	0.054	1
Mobp	0.00341525	-0.710997	0.304	0.505	1
Cadps	0.0035159	0.730701	0.283	0.108	1
Zfp131	0.00351841	0.36253	0.163	0.032	1
Gm35154	0.00358885	0.634272	0.141	0.022	1
Cd44	0.00365607	0.592911	0.141	0.022	1
Clec10a	0.00377596	-0.753393	0.207	0.398	1
Pwwp3a	0.00386459	-0.553774	0.022	0.14	1
Mctp1	0.00391808	-0.375285	0.783	0.968	1
Tbxas1	0.00396732	0.497653	0.717	0.538	1
Mtf2	0.00415328	0.516912	0.239	0.075	1
Lair1	0.00416835	0.930643	0.207	0.065	1
Wtip	0.00454124	0.543586	0.217	0.065	1
Nkain2	0.00457699	-0.487285	0.728	0.817	1
Otulinl	0.00458903	0.50664	0.511	0.29	1
Disc1	0.00477171	0.605032	0.424	0.215	1
Nalcn	0.00488195	-0.764224	0.043	0.172	1
Akr1a1	0.00494734	0.585611	0.326	0.14	1
Rnmt	0.00502436	0.659032	0.13	0.022	1
Asph	0.00511923	0.714276	0.174	0.043	1
Zfp697	0.00515519	0.582464	0.109	0.011	1
Ptpn13	0.00520889	-0.595025	0.011	0.108	1
Adgb	0.00526011	0.660015	0.196	0.054	1
Ebpl	0.00531782	-0.758095	0.011	0.108	1
B4galt3	0.00548507	0.482473	0.109	0.011	1
Scarb2	0.00548538	0.624222	0.38	0.194	1
Ddx31	0.00551123	0.432864	0.13	0.022	1
Necap1	0.00551123	0.475802	0.13	0.022	1
Wipi1	0.0055992	0.414691	0.109	0.011	1
Chd9	0.0056008	0.466547	0.837	0.645	1
Wdfy4	0.00570117	0.544047	0.391	0.194	1
Lrp1	0.00572209	0.808087	0.304	0.14	1
Adipor1	0.00579902	0.582572	0.261	0.097	1
Kcnip3	0.00580673	0.62114	0.326	0.14	1
Btaf1	0.00588705	0.56065	0.522	0.301	1
Maoa	0.00589552	0.481064	0.152	0.032	1
Mgat4a	0.00591507	0.521968	0.402	0.194	1
Plxna4	0.00604211	0.712173	0.446	0.247	1
Mylip	0.00605143	0.699366	0.207	0.065	1
Dhrs7b	0.00615144	0.468303	0.13	0.022	1
Togaram1	0.00615206	0.441989	0.25	0.086	1
BC035044	0.00626442	0.549903	0.13	0.022	1
Inpp5b	0.00630998	0.625707	0.163	0.043	1
Frmd4b	0.00634081	-0.431785	0.859	0.935	1
Fcgr2b	0.00636546	-0.632681	0.272	0.452	1
Tnk2	0.00651521	0.474633	0.152	0.032	1
Slc46a3	0.00671607	0.584234	0.239	0.086	1
Klhl18	0.00693257	0.742157	0.272	0.118	1
Lrp1b	0.00703946	-0.645949	0.554	0.645	1
Ubp1	0.0071291	0.444141	0.228	0.075	1
Ubr5	0.00725598	0.483946	0.554	0.301	1
Irf2	0.0073264	-0.582931	0.478	0.602	1
Tbc1d12	0.00735604	0.494547	0.272	0.108	1
Akr1b10	0.00738193	0.632091	0.163	0.043	1
App	0.00742502	-0.62344	0.609	0.667	1
Slc14a1	0.00753629	0.631292	0.391	0.194	1
4932438A13Rik	0.0075784	0.470439	0.467	0.269	1
Plxdc2	0.00778981	1.29791	0.391	0.226	1
Ppp2ca	0.00783237	0.626384	0.283	0.118	1
Stk19	0.00805779	0.510649	0.217	0.075	1
Sec24b	0.00820566	0.550809	0.283	0.118	1
Ptgds	0.00827541	-0.94193	0.087	0.226	1
Tmem189	0.00835438	0.527535	0.163	0.043	1
Kpna1	0.00843576	0.639977	0.228	0.086	1
Nrp1	0.00872059	0.354215	0.88	0.71	1
Ugdh	0.00875805	0.493112	0.12	0.022	1
Ppp6r1	0.00888746	0.504911	0.141	0.032	1
Bcl2l13	0.00891857	0.562209	0.12	0.022	1
Cmtm3	0.00891857	0.536954	0.12	0.022	1
Cd83	0.00891857	0.580848	0.12	0.022	1
Slc7a11	0.00903517	-0.983559	0.033	0.14	1
Irak2	0.00914732	0.708642	0.348	0.172	1
Chuk	0.00921606	0.486786	0.272	0.108	1
8030442B05Rik	0.00924751	0.651789	0.12	0.022	1
Mtdh	0.00931143	0.528038	0.511	0.29	1
Fbxw11	0.00940527	0.726837	0.359	0.183	1
Npc2	0.0094109	0.484914	0.272	0.118	1
Tet2	0.00941391	0.476251	0.446	0.247	1
Gm36279	0.00941601	0.552572	0.12	0.022	1
Dennd1a	0.00945895	-0.377535	0.815	0.86	1
Cnot6l	0.00946889	0.540768	0.37	0.183	1
Zfp981	0.00952657	-0.666725	0.054	0.172	1
Btrc	0.00971191	0.425181	0.37	0.183	1
Cdk8	0.00974023	0.43675	0.63	0.398	1
Sbno2	0.00974747	0.574211	0.315	0.14	1
Rnf169	0.00978304	-0.441718	0.696	0.817	1
Gm4951	0.00978775	-0.730286	0.261	0.409	1
Nfrkb	0.00983467	0.441995	0.185	0.054	1
Kcnk13	0.00992137	0.432852	0.315	0.151	1
Polr2m	0.00993805	0.411549	0.12	0.022	1
Pfas	0.00993805	0.486221	0.12	0.022	1
Tnks2	0.00998539	0.535386	0.554	0.355	1
Mapkapk3	0.0100282	0.436085	0.163	0.043	1
Cdk14	0.010081	-0.491003	0.598	0.688	1
Nrap	0.0103001	-0.543516	0.065	0.194	1
Entr1	0.0103104	0.571698	0.207	0.075	1
Wdr37	0.0103511	-0.609159	0.163	0.312	1
Cop1	0.0104563	0.511052	0.424	0.247	1
Egfr	0.0105272	-0.563064	0.293	0.462	1
Golim4	0.0106108	0.674405	0.152	0.043	1
Ttc37	0.0109229	0.602268	0.228	0.086	1
Slc10a7	0.010927	0.471635	0.402	0.204	1
Arhgap17	0.0113654	0.461657	0.554	0.333	1
Trim25	0.0116273	0.571487	0.196	0.065	1
Pgd	0.0116285	0.516296	0.152	0.043	1
Adam23	0.0118063	0.703719	0.152	0.043	1
Marcks	0.0119687	0.307886	0.38	0.183	1
Cd48	0.0120388	0.412741	0.217	0.075	1
Zfp609	0.0121227	-0.537701	0.261	0.419	1
Bcl2l1	0.0123259	0.53002	0.37	0.194	1
Fus	0.0123581	0.459919	0.75	0.559	1
Tshz1	0.0126887	-0.793522	0.098	0.226	1
Acadm	0.0127618	0.498771	0.174	0.054	1
Cdc40	0.0130674	0.500818	0.261	0.108	1
Mef2c	0.0130853	0.496963	0.957	0.817	1
Arhgef6	0.0131437	0.694196	0.304	0.151	1
Mfsd14b	0.013179	0.513967	0.207	0.075	1
Trp53bp2	0.013309	0.423883	0.174	0.054	1
Tafa1	0.0136145	0.441716	0.185	0.065	1
Gm5086	0.013861	0.536444	0.5	0.301	1
Ehbp1l1	0.013938	0.433389	0.239	0.097	1
Dock2	0.0139755	0.356883	0.87	0.731	1
Sgpl1	0.0140147	0.433041	0.37	0.183	1
Snx2	0.0143313	-0.372575	0.663	0.742	1
Tpm3	0.0144379	0.396108	0.478	0.28	1
Plgrkt	0.0145221	0.485776	0.239	0.097	1
Cmtm7	0.0146242	0.496581	0.467	0.269	1
Chd4	0.0147994	0.436314	0.424	0.237	1
Gphn	0.0148465	0.433405	0.935	0.839	1
Pik3cb	0.0149492	0.525391	0.13	0.032	1
Rasgrp3	0.0149624	0.609957	0.315	0.161	1
Gm31763	0.0149897	-0.700688	0.054	0.161	1
Ccnh	0.0152858	0.395105	0.174	0.054	1
Zwint	0.0154567	-0.732695	0.076	0.194	1
Trpv4	0.0154801	-0.729183	0.12	0.247	1
Zbtb16	0.0155588	-0.819024	0.033	0.129	1
Nbas	0.0156086	0.511087	0.272	0.118	1
Rab39	0.0157209	0.545228	0.109	0.022	1
Irf8	0.0157677	0.458039	0.402	0.215	1
Zc3hav1	0.0157778	0.52681	0.38	0.204	1
Cep19	0.0160007	-0.581878	0.022	0.108	1
Stk10	0.0160314	0.683272	0.326	0.172	1
Khdrbs1	0.0160864	0.590537	0.348	0.183	1
2700049A03Rik	0.0160973	0.522402	0.217	0.086	1
Nfya	0.0161398	0.334792	0.152	0.043	1
Tbcel	0.0161901	0.453715	0.13	0.032	1
Dtnbp1	0.0161979	0.598661	0.304	0.14	1
Lyst	0.0162436	0.392733	0.348	0.172	1
Sipa1l2	0.0162687	0.476049	0.359	0.194	1
Sh3gl2	0.0162849	0.529191	0.109	0.022	1
Anxa4	0.016303	-0.555644	0.054	0.161	1
Dtx2	0.0164489	0.432534	0.13	0.032	1
AU020206	0.0165314	0.646659	0.163	0.054	1
Nubpl	0.0165736	0.545419	0.109	0.022	1
Ndrg4	0.0167113	0.507668	0.13	0.032	1
Slit3	0.0167113	0.419116	0.13	0.032	1
Ippk	0.0168667	-0.595237	0.022	0.108	1
mt-Cytb	0.0171118	-0.517655	0.033	0.129	1
Lrpap1	0.0171643	-0.548464	0.022	0.108	1
Nt5c3	0.0171643	0.50195	0.109	0.022	1
Cpq	0.0173098	0.560593	0.446	0.269	1
Daglb	0.0174613	-0.674396	0.185	0.323	1
Hk2	0.017471	0.351872	0.326	0.161	1
Pofut1	0.0174735	0.544912	0.163	0.054	1
Kmt2a	0.0175286	0.422117	0.402	0.226	1
Upf2	0.0175469	0.439397	0.304	0.151	1
Rpl7	0.0176452	-0.667958	0.076	0.194	1
Pld2	0.0177163	0.493527	0.163	0.054	1
F11r	0.0177734	0.533263	0.109	0.022	1
Zc3h8	0.017798	0.408492	0.13	0.032	1
Atg3	0.01785	0.559692	0.239	0.108	1
Gramd1b	0.0179827	0.492823	0.25	0.108	1
Tet3	0.0181573	0.390761	0.663	0.452	1
Dusp16	0.0184014	0.395887	0.109	0.022	1
Hgsnat	0.0184057	-0.85762	0.272	0.409	1
Acyp2	0.0185082	-0.636729	0.033	0.129	1
Med13l	0.0185179	0.435989	0.609	0.43	1
Ssb	0.0185481	0.583344	0.196	0.075	1
Stx7	0.0186663	0.538634	0.348	0.183	1
Homer2	0.0186723	-0.669374	0.065	0.172	1
Ciz1	0.0187341	0.574453	0.141	0.043	1
Arhgap25	0.018791	0.643249	0.293	0.151	1
Cap1	0.0189299	0.51081	0.228	0.097	1
E230029C05Rik	0.0191686	0.897416	0.174	0.065	1
Cep164	0.0192431	0.310401	0.13	0.032	1
Col4a3bp	0.0192968	0.44278	0.348	0.183	1
Foxo3	0.0194722	0.292381	0.457	0.247	1
Wdr45b	0.0195051	0.42515	0.293	0.14	1
Psmc6	0.0197093	0.48091	0.217	0.086	1
Snx8	0.0198713	-0.544681	0.413	0.527	1
Apaf1	0.019882	0.423136	0.348	0.172	1
Dlst	0.0198939	0.392111	0.185	0.065	1
Kif21a	0.0199305	-0.680971	0.087	0.204	1
Tra2b	0.0200793	-0.559331	0.304	0.462	1
Fam3c	0.0202252	0.492124	0.196	0.075	1
Ino80dos	0.020408	0.408514	0.185	0.065	1
Fem1c	0.0204546	0.508058	0.141	0.043	1
Ngly1	0.0204595	-0.645949	0.065	0.172	1
Stx16	0.0207605	0.393298	0.489	0.28	1
Brd4	0.0210435	0.53419	0.511	0.323	1
Taok3	0.0212402	0.451905	0.609	0.441	1
Memo1	0.0212522	0.527731	0.272	0.129	1
Ndst1	0.0217287	0.363328	0.163	0.054	1
Trappc11	0.021834	-0.524028	0.043	0.14	1
Pacs1	0.0222563	0.608581	0.467	0.312	1
Plcl1	0.0223158	0.439394	0.391	0.215	1
Prdm11	0.0226347	0.602672	0.141	0.043	1
Hnrnpa1	0.0226347	0.532828	0.141	0.043	1
Csnk1d	0.0228274	0.429006	0.228	0.097	1
Slc35e2	0.0229621	0.39568	0.141	0.043	1
Nedd9	0.022975	0.570671	0.174	0.065	1
Pou2f1	0.0231888	0.419782	0.359	0.194	1
Efhd2	0.0232704	0.504645	0.174	0.065	1
Zfyve9	0.0233729	0.530403	0.207	0.086	1
Ube3c	0.0233756	0.48067	0.348	0.183	1
Pald1	0.0234092	0.378682	0.196	0.075	1
Fam168b	0.0234232	0.558126	0.25	0.118	1
Irak1	0.0236932	0.484668	0.196	0.075	1
Osbpl9	0.0241126	-0.449959	0.739	0.806	1
Klhl6	0.0243191	0.53905	0.239	0.108	1
Sf3b3	0.0244161	0.336171	0.196	0.075	1
Sept10	0.024924	0.487907	0.12	0.032	1
Rpl13a	0.0250082	-0.448411	0.076	0.194	1
Rbbp6	0.0250304	0.343114	0.315	0.151	1
Cpd	0.0251132	0.560423	0.174	0.065	1
2610037D02Rik	0.0251421	-0.589515	0.098	0.215	1
Fchsd2	0.0252777	0.44781	0.783	0.634	1
Slc11a2	0.0253132	0.43541	0.12	0.032	1
Engase	0.025371	0.401283	0.141	0.043	1
Rims1	0.025374	0.422927	0.228	0.097	1
Adipor2	0.0256373	0.643857	0.185	0.075	1
Slc37a3	0.0257075	0.405396	0.12	0.032	1
Kmt5c	0.0257324	0.284475	0.141	0.043	1
Pcmt1	0.0258563	0.521233	0.217	0.097	1
Nr1d2	0.0259501	0.490269	0.185	0.075	1
Ttc27	0.0261072	0.374527	0.12	0.032	1
Zfp292	0.0261905	0.400793	0.554	0.366	1
Rev1	0.0263121	0.435543	0.304	0.151	1
Cpeb4	0.0263286	0.338477	0.293	0.14	1
Fmn1	0.0264691	0.512606	0.261	0.129	1
Incenp	0.0265122	0.408347	0.12	0.032	1
Zfyve26	0.0269894	0.64684	0.239	0.118	1
0610010F05Rik	0.0271188	-0.788512	0.109	0.226	1
Inpp5d	0.0271629	0.393645	0.804	0.667	1
Srbd1	0.0271654	0.383795	0.272	0.129	1
Prkar1a	0.0272115	0.303787	0.163	0.054	1
Prkcb	0.0272992	0.674167	0.533	0.376	1
Lars2	0.0273307	0.397414	0.576	0.355	1
Ppp4r3a	0.0273786	0.365885	0.293	0.14	1
Gm13710	0.0273968	0.586615	0.359	0.215	1
Tm9sf2	0.0275544	-0.746813	0.207	0.323	1
Zfpm2	0.0275636	0.379368	0.185	0.075	1
Tnip2	0.0281871	0.465226	0.12	0.032	1
Ubfd1	0.0281871	0.479358	0.12	0.032	1
Hnrnpr	0.0284064	0.486657	0.304	0.151	1
Usp28	0.0284656	0.370592	0.174	0.065	1
Eif4g2	0.0287051	0.38884	0.272	0.129	1
Mrps28	0.0288777	0.357339	0.25	0.118	1
Tmem108	0.0289821	0.672067	0.163	0.065	1
S100pbp	0.0291805	0.264978	0.174	0.065	1
Clasp2	0.0293561	0.529944	0.63	0.441	1
Brip1os	0.0294177	0.413367	0.207	0.086	1
Rasa4	0.0294307	0.449685	0.283	0.14	1
Ifitm10	0.0295465	0.457267	0.152	0.054	1
Rnf121	0.0299108	0.335258	0.174	0.065	1
Cdc14a	0.0299111	-0.583453	0.065	0.161	1
Zfp871	0.0300203	0.362656	0.272	0.129	1
Vps54	0.0301419	0.521505	0.413	0.258	1
Siah1a	0.0301884	0.513368	0.217	0.097	1
Prim2	0.0303347	0.474239	0.152	0.054	1
Hps4	0.0303509	0.491636	0.228	0.108	1
Gm32036	0.0304315	0.393732	0.207	0.086	1
Dennd5b	0.0308701	-0.429926	0.033	0.118	1
Csde1	0.0309702	0.537947	0.304	0.161	1
Xpnpep3	0.0310514	0.43786	0.185	0.075	1
Stat1	0.0310639	0.644345	0.196	0.086	1
Snd1	0.0310682	0.416626	0.554	0.355	1
Dnajc6	0.0312027	-0.595147	0.043	0.129	1
Eif4a1	0.0317801	0.479971	0.196	0.086	1
Twf2	0.031793	0.596185	0.185	0.075	1
Sdad1	0.0318118	0.279284	0.12	0.032	1
Arsb	0.0320368	0.597029	0.38	0.237	1
Atp6v0d1	0.0321057	0.408669	0.391	0.215	1
Igfbp4	0.0322313	-0.68132	0.109	0.215	1
Sema4d	0.0323718	0.525153	0.261	0.129	1
Kif1b	0.0324285	-0.681579	0.337	0.441	1
Itgav	0.0325105	0.624746	0.196	0.086	1
Rbm6	0.0326266	0.34579	0.576	0.419	1
Rftn1	0.0327168	0.489736	0.413	0.258	1
Ncoa5	0.032982	0.302064	0.25	0.118	1
Plcg1	0.0330112	0.516233	0.13	0.043	1
Kmo	0.0334704	-0.53715	0.065	0.161	1
Tbc1d32	0.0334704	-0.55259	0.065	0.161	1
Prkcd	0.0336506	0.442369	0.424	0.269	1
Ttc7b	0.0336905	0.335434	0.283	0.14	1
Thsd7a	0.033713	0.531969	0.185	0.075	1
Cpne1	0.034014	-0.572179	0.152	0.269	1
Tmf1	0.0340166	0.398717	0.217	0.097	1
Cers2	0.0343089	-0.645337	0.065	0.161	1
Ranbp9	0.0345403	0.484121	0.413	0.247	1
Gmds	0.034672	0.530487	0.315	0.172	1
Sh3kbp1	0.0348832	-0.426443	0.457	0.548	1
Gm27201	0.035	0.354402	0.152	0.054	1
Esyt2	0.0352447	0.615213	0.293	0.161	1
Cpeb2	0.0354979	0.580784	0.239	0.118	1
Ano6	0.0357654	-0.631136	0.293	0.419	1
Ube2l3	0.0359778	0.52649	0.196	0.086	1
Ahnak	0.0361083	-0.778863	0.087	0.183	1
Phlpp1	0.0362668	0.560667	0.337	0.194	1
Abcf1	0.0363921	0.417469	0.13	0.043	1
Fbxo42	0.0366629	0.305043	0.217	0.097	1
Plekhm3	0.0367238	0.502108	0.304	0.161	1
Clip1	0.0370441	0.351474	0.228	0.108	1
Polr2a	0.0372015	-0.581217	0.087	0.194	1
Tgfb1	0.0372283	0.406583	0.304	0.161	1
Sdf2	0.0374193	0.334656	0.185	0.075	1
Pde7b	0.0376683	-0.900812	0.402	0.527	1
Pik3cg	0.0377819	0.272174	0.37	0.215	1
Rfx3	0.0378372	0.372027	0.359	0.204	1
Slc38a6	0.0379381	0.408661	0.598	0.43	1
Unc79	0.0380187	-0.624358	0.054	0.14	1
Adnp	0.0380985	0.421009	0.37	0.215	1
Atf4	0.0381901	0.475357	0.13	0.043	1
Pard3b	0.0385097	0.512509	0.435	0.29	1
Metap1	0.0385403	0.392155	0.163	0.065	1
Cep68	0.0385666	0.413762	0.38	0.226	1
Psmc1	0.038984	0.404711	0.13	0.043	1
Trim47	0.0390108	0.410691	0.163	0.065	1
Tpcn1	0.0390113	0.548092	0.272	0.151	1
Pik3c3	0.0391747	0.380854	0.185	0.075	1
Ubl3	0.0393086	0.51613	0.37	0.226	1
Sema4c	0.0393486	0.511216	0.109	0.032	1
Fopnl	0.0396454	-0.624522	0.033	0.108	1
Zc3h15	0.0398086	0.473219	0.228	0.108	1
Arap1	0.039849	0.419573	0.239	0.118	1
Acsl1	0.039849	0.38709	0.239	0.118	1
AC149090.1	0.0399924	0.276891	0.88	0.774	1
Fip1l1	0.0400171	0.509329	0.315	0.183	1
Ythdf3	0.0400624	0.650434	0.435	0.28	1
Ankrd10	0.0402478	0.584284	0.239	0.118	1
Clpx	0.0402675	0.333993	0.25	0.118	1
Dpp10	0.0403826	0.485485	0.424	0.269	1
Cwc22	0.0404508	0.384772	0.163	0.065	1
Dnajc8	0.0404508	0.397855	0.163	0.065	1
Adam33	0.0405268	-0.457609	0.337	0.452	1
Szrd1	0.0405368	0.347689	0.185	0.075	1
Actr1a	0.0405474	0.54554	0.109	0.032	1
Prmt7	0.0406127	0.35775	0.13	0.043	1
Uba6	0.0406393	0.481079	0.196	0.086	1
Wbp2	0.0411688	0.352279	0.13	0.043	1
Wdr33	0.041252	0.427258	0.511	0.333	1
Hivep3	0.0413413	-0.344283	0.609	0.731	1
Dnhd1	0.0414667	-0.475785	0.033	0.108	1
G3bp1	0.0416165	0.543755	0.25	0.129	1
Atp6v0a2	0.041731	0.340202	0.13	0.043	1
Parg	0.0418778	-0.631121	0.13	0.237	1
Garnl3	0.0419356	0.333206	0.163	0.065	1
Adamts10	0.0419961	0.318695	0.196	0.086	1
Cnpy3	0.0421874	-0.458701	0.065	0.161	1
Ddx5	0.0422255	-0.270277	0.804	0.806	1
Dpyd	0.0422996	-0.316456	0.043	0.129	1
Rpl26	0.0424036	0.54935	0.109	0.032	1
Cmah	0.0424998	0.411028	0.37	0.204	1
Raf1	0.0425481	0.388338	0.359	0.204	1
Rbbp7	0.0427198	-0.519718	0.033	0.108	1
Wdfy1	0.0427463	0.415404	0.228	0.108	1
Eif2ak4	0.0429218	0.409716	0.196	0.086	1
Tsc1	0.0429286	0.257272	0.217	0.097	1
Pacsin2	0.0429366	0.446165	0.489	0.333	1
Tanc2	0.0429517	0.322238	0.826	0.71	1
Asb3	0.0433911	0.386874	0.196	0.086	1
Morc3	0.0435756	0.340898	0.533	0.376	1
Pdss2	0.0436623	-0.651313	0.185	0.301	1
Ap4e1	0.0436805	0.407782	0.109	0.032	1
Maea	0.0438097	0.489742	0.141	0.054	1
Cspp1	0.0442242	-0.80145	0.196	0.301	1
Ncoa3	0.0443636	0.379819	0.598	0.387	1
Dgkz	0.0447212	0.4507	0.337	0.194	1
Kdm5a	0.0449371	0.378207	0.326	0.183	1
Pon3	0.0449388	0.479419	0.141	0.054	1
Kif5c	0.0449898	0.319653	0.109	0.032	1
Tmem178b	0.0452088	-0.716545	0.109	0.204	1
Atp9b	0.0452589	0.425646	0.489	0.323	1
Polr2b	0.0455125	0.42371	0.141	0.054	1
Tmem30a	0.0455125	0.436296	0.141	0.054	1
Man2a1	0.0455686	-0.479647	0.413	0.516	1
Mtus1	0.0456362	0.302514	0.413	0.247	1
Hdac3	0.0456563	-0.449928	0.033	0.108	1
Sipa1l3	0.0457824	0.4496	0.304	0.172	1
Cd84	0.0457899	0.451442	0.5	0.333	1
Gtf2a1	0.0458546	0.571262	0.196	0.097	1
Rint1	0.0460923	-0.503227	0.054	0.14	1
C1qc	0.0461245	-0.339896	0.543	0.613	1
Sap30bp	0.0463321	0.280817	0.109	0.032	1
Ice1	0.0463867	0.63862	0.207	0.108	1
Ei24	0.0466729	-0.402669	0.033	0.108	1
Tmem165	0.0467903	-0.405946	0.076	0.172	1
Safb	0.0470524	0.380026	0.272	0.14	1
Lrrc8d	0.0470893	0.442236	0.315	0.194	1
Wdr59	0.0472707	0.313589	0.141	0.054	1
Sp140	0.0473437	0.49082	0.217	0.108	1
Mgl2	0.0475826	-0.643862	0.098	0.194	1
Phf14	0.0476528	-0.434328	0.359	0.473	1
Mark1	0.0477079	0.280404	0.109	0.032	1
Ttyh3	0.0478235	0.432868	0.217	0.108	1
Ctsz	0.0480111	0.389345	0.283	0.151	1
Nek7	0.0480651	0.292891	0.478	0.28	1
Rai1	0.0481364	0.269776	0.359	0.204	1
Cand1	0.0482328	-0.499897	0.043	0.118	1
Ntm	0.0484799	0.31978	0.543	0.366	1
Tbce	0.048689	-0.630415	0.12	0.215	1
Stau2	0.0492874	0.497988	0.217	0.108	1
Hectd1	0.0493391	0.250116	0.533	0.323	1
Aagab	0.0494389	0.394545	0.239	0.118	1
Tomm34	0.0494758	-0.433466	0.033	0.108	1
Zscan29	0.0495378	-0.521149	0.065	0.151	1
Nup155	0.0498359	0.298751	0.109	0.032	1
Il10ra	0.0499848	0.519989	0.272	0.151	1
Zfp407	0.0502491	0.368707	0.478	0.301	1
Atp11b	0.0503514	0.411989	0.25	0.129	1
Ms4a4a	0.050522	-0.945186	0.272	0.366	1
Hif3a	0.0507314	-0.587264	0.065	0.151	1
Ugp2	0.0508071	0.351658	0.207	0.097	1
Elmsan1	0.0511529	0.389389	0.293	0.161	1
Sufu	0.0513311	0.387659	0.207	0.097	1
Mtpap	0.0516695	-0.270526	0.033	0.108	1
Wdr26	0.0519778	0.2958	0.62	0.462	1
Sema4b	0.0522407	0.312272	0.141	0.054	1
F630028O10Rik	0.0522433	-0.530776	0.457	0.559	1
Nvl	0.0522453	-0.510611	0.141	0.247	1
Ophn1	0.0524317	0.326441	0.848	0.753	1
Wwc2	0.0525151	0.528812	0.304	0.183	1
Rab10os	0.0526716	0.513451	0.12	0.043	1
Nipbl	0.0527207	0.368842	0.728	0.57	1
Fam126a	0.0528697	0.313943	0.239	0.118	1
Itfg1	0.0530072	-0.655129	0.185	0.29	1
Hpf1	0.0530267	-0.473466	0.043	0.118	1
Itgb5	0.0531209	0.517263	0.391	0.247	1
Ercc5	0.053191	0.514033	0.152	0.065	1
Zfand3	0.0533211	0.34478	0.565	0.387	1
C130071C03Rik	0.0538213	-0.795723	0.065	0.151	1
Kdm6a	0.0539975	0.336753	0.424	0.269	1
Sp110	0.0541037	0.394452	0.12	0.043	1
Kif16b	0.0542271	0.263515	0.37	0.226	1
Rbis	0.0544674	-0.451859	0.043	0.118	1
Epb41l3	0.0547441	0.419943	0.239	0.129	1
Gatad2b	0.0549606	0.496137	0.337	0.204	1
Usp32	0.0554064	0.41546	0.337	0.204	1
Dgcr8	0.0555692	0.380467	0.12	0.043	1
Nfkb1	0.0557581	0.38972	0.478	0.312	1
Pptc7	0.0562486	0.331168	0.141	0.054	1
Ssbp1	0.0563927	0.256804	0.228	0.108	1
1700006J14Rik	0.0566895	-0.564313	0.043	0.118	1
Ptpre	0.0568463	0.33938	0.261	0.14	1
Cd53	0.0569198	0.375733	0.185	0.086	1
Cstf3	0.056986	0.302198	0.348	0.215	1
Npas2	0.0570671	0.481024	0.12	0.043	1
Fastk	0.0570671	0.467473	0.12	0.043	1
Dusp3	0.0570671	0.438483	0.12	0.043	1
Mbnl2	0.0572151	0.386926	0.674	0.527	1
Zswim6	0.0574639	0.252286	0.902	0.785	1
Slc35f1	0.0577349	-0.559497	0.065	0.151	1
Psmb1	0.0577349	0.453139	0.152	0.065	1
Dnaja3	0.0578286	0.440233	0.12	0.043	1
Ggta1	0.0581448	0.517731	0.337	0.204	1
Elavl1	0.0581646	0.373773	0.283	0.161	1
Ivd	0.0583102	0.360252	0.217	0.108	1
Arid4b	0.0585266	0.432426	0.446	0.312	1
Pex5l	0.0589818	-0.566007	0.087	0.172	1
Stag1	0.0590177	0.296394	0.696	0.527	1
Smndc1	0.0590604	0.281616	0.141	0.054	1
Poldip3	0.0590905	0.442778	0.152	0.065	1
Cit	0.0593768	0.394416	0.12	0.043	1
Phc2	0.0593977	0.272976	0.337	0.194	1
Fat3	0.0596504	0.592264	0.207	0.108	1
Rpl27	0.0597692	-0.383355	0.043	0.118	1
Trappc8	0.0600335	0.415637	0.391	0.258	1
Ablim2	0.0604733	-0.485461	0.065	0.151	1
Cttnbp2nl	0.0607296	0.351369	0.359	0.215	1
Kpna6	0.0609588	0.274227	0.12	0.043	1
Mettl8	0.0609593	0.333871	0.12	0.043	1
Lncppara	0.0609648	-0.500838	0.098	0.194	1
Plekhm2	0.061173	0.433879	0.348	0.215	1
Zfp787	0.0611744	0.403289	0.152	0.065	1
Hsd17b4	0.0611744	0.466117	0.152	0.065	1
Mindy2	0.0612722	0.299006	0.272	0.151	1
Olig1	0.0613603	-0.479597	0.043	0.118	1
Pak7	0.0613644	-0.692871	0.076	0.161	1
Hdlbp	0.0614153	0.39309	0.272	0.161	1
Ttc9c	0.0615507	-0.547393	0.087	0.172	1
Nop58	0.0617636	0.320391	0.12	0.043	1
Slc2a13	0.0617636	0.438145	0.12	0.043	1
Nemf	0.0621558	0.333288	0.261	0.14	1
E2f3	0.0624808	0.415441	0.272	0.161	1
Slc12a6	0.0625206	0.281931	0.696	0.527	1
Rbm28	0.0625558	0.367781	0.185	0.086	1
Stx6	0.063009	0.292347	0.217	0.108	1
Marf1	0.063114	0.287451	0.359	0.204	1
Tbc1d24	0.0633184	0.380549	0.152	0.065	1
Sf3b1	0.0635141	0.294939	0.543	0.398	1
Pwwp2a	0.0636955	0.495345	0.37	0.237	1
Serp1	0.0638127	-0.45533	0.043	0.118	1
Cc2d1b	0.0642292	0.287936	0.12	0.043	1
Gmpr	0.0642292	0.337017	0.12	0.043	1
Matr3	0.0642292	0.26157	0.12	0.043	1
Btbd7	0.064884	0.292566	0.457	0.301	1
Stk39	0.0648922	-0.718556	0.087	0.172	1
Fam118a	0.0649605	-0.689506	0.152	0.247	1
Chn1	0.0650689	0.289463	0.12	0.043	1
Cenpp	0.0650689	0.348549	0.12	0.043	1
Adgre1	0.0651559	0.447101	0.663	0.559	1
Eif2s1	0.0651843	0.396936	0.163	0.075	1
Atp11a	0.0651962	0.438034	0.13	0.054	1
Smurf1	0.0652541	0.268926	0.293	0.161	1
Ly6e	0.065358	-0.562926	0.228	0.333	1
Rab11b	0.0655966	-0.547607	0.054	0.129	1
Git2	0.0657747	0.316147	0.533	0.355	1
Eif4h	0.0658334	-0.692127	0.13	0.215	1
Api5	0.0659177	0.303075	0.12	0.043	1
Tubb5	0.065999	0.602092	0.13	0.054	1
Metap1d	0.066	0.521971	0.239	0.14	1
Exoc2	0.06602	0.398394	0.315	0.194	1
Lrmp	0.0660772	0.394951	0.293	0.161	1
Ampd3	0.0662732	0.313596	0.152	0.065	1
Glyr1	0.0663963	0.424669	0.196	0.097	1
Irf9	0.0667118	-0.535358	0.098	0.183	1
Cep57	0.0668099	0.420544	0.13	0.054	1
Galk2	0.0668853	-0.527086	0.239	0.333	1
Trp53bp1	0.0670567	0.381546	0.207	0.108	1
Zfp90	0.0670567	0.358087	0.207	0.108	1
Herpud1	0.0672184	-0.460379	0.054	0.129	1
Larp4	0.0672729	0.462322	0.25	0.14	1
Ppp2r5e	0.0675927	0.347237	0.391	0.258	1
Psma7	0.0676425	0.314838	0.12	0.043	1
Papola	0.0677012	0.348154	0.522	0.333	1
Xpr1	0.0677983	0.276914	0.304	0.172	1
Cacna1d	0.0679233	0.468338	0.424	0.29	1
Adam15	0.0683815	-0.605268	0.087	0.172	1
Uba5	0.0685188	0.28472	0.12	0.043	1
Aff1	0.0686511	-0.465239	0.315	0.398	1
Bcl2l11	0.0694044	0.343704	0.12	0.043	1
Pced1b	0.0694573	0.445624	0.185	0.097	1
Abr	0.0697302	0.347412	0.413	0.258	1
Crebrf	0.0697615	-0.328712	0.337	0.43	1
Ppp1cc	0.0697733	0.396805	0.196	0.097	1
Plekhg1	0.0699025	-0.511546	0.13	0.226	1
Itpr2	0.0699711	0.386776	0.565	0.387	1
Oxct1	0.0699733	0.398193	0.37	0.237	1
Arid2	0.0701262	0.381953	0.391	0.247	1
Klf6	0.070158	-0.401691	0.098	0.183	1
Sh3pxd2a	0.0704761	-0.318765	0.435	0.548	1
N4bp2l1	0.0706736	0.347875	0.283	0.161	1
Rnf214	0.0708834	0.308125	0.228	0.118	1
Med14	0.0711631	0.394998	0.196	0.097	1
Vps35	0.0713667	0.319151	0.293	0.172	1
Etv5	0.0714767	0.321355	0.304	0.172	1
Lcor	0.0717152	0.387904	0.543	0.387	1
Tmlhe	0.0718295	-0.456127	0.13	0.226	1
Gsk3b	0.0718539	0.269259	0.554	0.409	1
Nrbp2	0.0718556	-0.346296	0.076	0.161	1
Cebpz	0.071856	0.354921	0.163	0.075	1
Smg1	0.0720987	0.289575	0.576	0.398	1
Tfrc	0.0725239	0.434704	0.152	0.065	1
Il17ra	0.0727185	0.414903	0.13	0.054	1
Rab11fip3	0.0727708	0.467965	0.174	0.086	1
Lcp2	0.0729032	0.445293	0.435	0.301	1
Arf3	0.0730991	0.312916	0.25	0.129	1
Ola1	0.0732902	0.327413	0.196	0.097	1
Plekho2	0.0735965	0.322898	0.13	0.054	1
Jmy	0.0741598	0.306511	0.152	0.065	1
Flcn	0.074198	0.324173	0.228	0.118	1
Gm17106	0.0742005	0.493715	0.163	0.075	1
Bach2	0.0743437	0.440237	0.391	0.237	1
Tsg101	0.0744832	0.400015	0.13	0.054	1
Prdm1	0.0744832	0.412995	0.13	0.054	1
Cwc27	0.0748918	0.273904	0.283	0.161	1
Msn	0.0751316	0.531784	0.261	0.151	1
Pstpip2	0.075315	-0.442435	0.413	0.516	1
Dus2	0.0753785	0.337685	0.13	0.054	1
Naa35	0.075469	0.321999	0.196	0.097	1
Jak1	0.0754846	0.38785	0.467	0.323	1
Scamp5	0.0756308	0.348991	0.38	0.226	1
Acad8	0.0758258	0.275122	0.152	0.065	1
Taldo1	0.0758295	-0.494939	0.054	0.129	1
Zfp110	0.0762826	0.367974	0.13	0.054	1
Uba2	0.0763037	-0.533637	0.109	0.194	1
Cdk11b	0.0766469	0.311053	0.239	0.129	1
Tia1	0.0776253	0.43694	0.337	0.215	1
Cfh	0.0777802	-0.329013	0.761	0.828	1
Snx10	0.0780928	0.370239	0.207	0.108	1
Cln3	0.0780928	0.364804	0.207	0.108	1
Orai1	0.0782466	-0.380101	0.076	0.161	1
Pts	0.0782466	0.44338	0.163	0.075	1
Stard9	0.078352	0.267417	0.522	0.344	1
Zfp207	0.0784521	-0.38893	0.283	0.387	1
Srcap	0.078752	0.306409	0.391	0.247	1
H2afj	0.0788268	-0.607186	0.043	0.108	1
Shb	0.0789979	0.574179	0.141	0.065	1
Nab1	0.0790482	0.299221	0.13	0.054	1
Psmd4	0.0790482	0.373572	0.13	0.054	1
Pde1b	0.0790482	0.326514	0.13	0.054	1
Ddx3x	0.0794856	0.323422	0.283	0.172	1
Fbxo11	0.0797032	0.455991	0.511	0.376	1
Brd1	0.0797516	0.300457	0.424	0.269	1
Crat	0.0798519	-0.721285	0.043	0.108	1
Dcaf5	0.0799126	0.457591	0.293	0.172	1
Golga1	0.0799146	0.351726	0.163	0.075	1
Tbc1d22a	0.0799348	0.364453	0.533	0.376	1
Rpl13	0.0800916	0.326667	0.239	0.129	1
Camk2g	0.0803183	0.336086	0.207	0.108	1
Ighm	0.0804613	-0.416687	0.054	0.129	1
Pde4a	0.0807589	0.390387	0.196	0.097	1
Deptor	0.0807954	0.303898	0.239	0.129	1
Slfn2	0.0808878	-0.55041	0.043	0.108	1
Aup1	0.0812463	-0.419912	0.065	0.14	1
Clasp1	0.0814437	0.573163	0.304	0.194	1
Timm23	0.0815573	-0.488782	0.109	0.194	1
Stim2	0.0817653	0.443508	0.228	0.129	1
Ndfip1	0.0818415	-0.413389	0.424	0.495	1
Nsrp1	0.0818948	0.257715	0.13	0.054	1
Usp47	0.0822535	0.327577	0.315	0.194	1
Vti1a	0.082289	0.318835	0.598	0.441	1
Nfix	0.0823312	-0.453956	0.109	0.194	1
Tmem127	0.0823766	0.314755	0.13	0.054	1
Ube2d1	0.0824445	-0.679861	0.087	0.161	1
Sos1	0.0826715	0.300485	0.228	0.118	1
Cd81	0.0827331	-0.514007	0.12	0.204	1
Stx4a	0.0828619	0.306982	0.13	0.054	1
Pdgfa	0.0829923	-0.520732	0.043	0.108	1
Phf1	0.0829923	-0.56034	0.043	0.108	1
Basp1	0.0831301	0.435323	0.217	0.118	1
Sox5	0.0833372	0.41078	0.163	0.075	1
Ptma	0.0838382	0.285846	0.13	0.054	1
Ilkap	0.0839128	0.343639	0.174	0.086	1
Ccdc93	0.0843401	0.30972	0.337	0.204	1
Itga4	0.0845715	0.359657	0.435	0.29	1
Prickle1	0.0846089	-0.448435	0.098	0.183	1
Bmp2k	0.0846181	0.263456	0.707	0.548	1
Gm17231	0.0847589	0.365162	0.174	0.086	1
Mapt	0.0847589	0.368298	0.174	0.086	1
Gm3448	0.085141	-0.456277	0.043	0.108	1
Rab11fip5	0.085158	0.356221	0.293	0.172	1
Grip1	0.0854065	0.410587	0.217	0.118	1
Rps6ka5	0.0854065	0.380481	0.217	0.118	1
Ccnt1	0.0854794	-0.404337	0.152	0.247	1
Wsb1	0.0857285	-0.477346	0.326	0.398	1
Oas2	0.0858097	-0.5142	0.12	0.204	1
Stub1	0.0860404	0.346093	0.174	0.086	1
Stard5	0.0862003	-0.540575	0.12	0.204	1
Tor1aip2	0.0862609	0.393941	0.185	0.097	1
Gm26740	0.0864043	0.252301	0.641	0.527	1
Pabpn1	0.0864153	0.32223	0.413	0.247	1
Cops5	0.0864716	0.321749	0.174	0.086	1
Il21r	0.0866084	0.325529	0.239	0.129	1
Adgrl1	0.086855	-0.546127	0.065	0.14	1
Ccdc58	0.086855	-0.431456	0.065	0.14	1
Rgl2	0.086871	0.389476	0.391	0.258	1
Cul9	0.0868775	0.269912	0.163	0.075	1
Clcn3	0.0873321	0.320596	0.261	0.151	1
Hadhb	0.0873345	0.37467	0.109	0.043	1
Tbc1d8	0.0874387	0.315549	0.304	0.183	1
9330159F19Rik	0.0884482	-0.365893	0.043	0.108	1
Fbxl6	0.0884482	-0.426696	0.043	0.108	1
Pip5k1a	0.0886409	0.518336	0.152	0.075	1
Cdk10	0.0888606	0.272102	0.13	0.054	1
4930522L14Rik	0.0892823	0.340179	0.141	0.065	1
Slc25a4	0.0892823	0.394137	0.141	0.065	1
Ahi1	0.0893725	-0.252691	0.141	0.247	1
Aldoa	0.089442	-0.560251	0.087	0.161	1
Ccdc6	0.0895734	0.359097	0.109	0.043	1
Mbnl1	0.0897166	0.268462	0.87	0.796	1
Myh9	0.0899481	0.419541	0.413	0.269	1
Nup88	0.0900498	-0.480143	0.076	0.151	1
Edem1	0.0902684	0.369756	0.141	0.065	1
Clmp	0.0904137	-0.339509	0.054	0.129	1
Nek1	0.09071	0.358901	0.109	0.043	1
Pcdh17	0.09071	0.420417	0.109	0.043	1
Smarca5	0.0909143	0.345724	0.217	0.118	1
Far1	0.091297	-0.64726	0.337	0.398	1
Lst1	0.0913939	0.547266	0.304	0.194	1
Avl9	0.0917321	0.433401	0.25	0.151	1
Pik3ap1	0.0917433	0.321958	0.565	0.409	1
Reps2	0.091824	0.452437	0.413	0.29	1
Chp1	0.0918582	0.290148	0.109	0.043	1
Cacna1c	0.0921863	-0.634949	0.087	0.161	1
Pign	0.092201	0.313554	0.315	0.194	1
Trim8	0.0922669	0.418665	0.141	0.065	1
Mbtps2	0.0922669	0.394997	0.141	0.065	1
Cyfip1	0.0923601	0.405918	0.554	0.452	1
Etl4	0.0923891	0.416644	0.228	0.129	1
Itpkb	0.0923997	0.250613	0.435	0.28	1
Arap2	0.092626	0.344878	0.239	0.14	1
Naca	0.0930181	-0.398653	0.043	0.108	1
Arfgap3	0.0930181	-0.445285	0.043	0.108	1
Amph	0.0932794	0.281784	0.141	0.065	1
Colec12	0.0935515	-0.360234	0.5	0.613	1
Esf1	0.0935831	-0.687697	0.087	0.161	1
Lactb2	0.0940203	0.490284	0.185	0.097	1
Gmip	0.0941382	0.360879	0.337	0.215	1
Timd4	0.0941896	-0.567222	0.043	0.108	1
Wdr7	0.0943846	0.270316	0.446	0.29	1
Samd12	0.0948149	-0.383355	0.065	0.14	1
Gjc3	0.094879	-0.520991	0.076	0.151	1
Ppm1a	0.0949883	0.367179	0.239	0.14	1
Mroh1	0.0951293	0.25841	0.304	0.183	1
Sult1a1	0.0952668	-0.584447	0.098	0.172	1
Hivep1	0.0952668	-0.594429	0.098	0.172	1
Rnasel	0.0952813	0.35947	0.293	0.183	1
Rpl22l1	0.095373	0.304412	0.109	0.043	1
Actr2	0.0959297	0.286978	0.435	0.323	1
Pikfyve	0.0960777	0.251381	0.326	0.204	1
Erc2	0.0961443	0.399819	0.283	0.172	1
Cbl	0.0961887	0.36376	0.533	0.409	1
Setd1b	0.0963705	0.366242	0.141	0.065	1
Snx18	0.0964222	0.39694	0.196	0.108	1
Hibch	0.0965683	0.28581	0.109	0.043	1
Srsf9	0.0965683	-0.344893	0.043	0.108	1
Enpp6	0.0965683	0.308055	0.109	0.043	1
Pdk1	0.0967278	0.257182	0.185	0.097	1
Nr6a1	0.0968654	-0.544086	0.174	0.269	1
Zdhhc17	0.0973577	0.388431	0.261	0.161	1
Erp29	0.0975311	0.374894	0.272	0.161	1
Capzb	0.0976065	0.38651	0.359	0.237	1
Chn2	0.0977613	0.515129	0.326	0.215	1
Fam104a	0.0977755	0.259375	0.109	0.043	1
Polb	0.0981172	-0.466343	0.228	0.312	1
Spats2l	0.0981999	0.546483	0.196	0.108	1
Mllt3	0.0981999	-0.478993	0.109	0.194	1
Slc24a3	0.0985671	0.372822	0.185	0.097	1
Ppp2r2b	0.0986792	0.417136	0.261	0.151	1
Eif4e2	0.0989947	0.311607	0.109	0.043	1
Palld	0.0989947	0.275849	0.109	0.043	1
Pum1	0.099433	0.330762	0.38	0.247	1
Ncf2	0.099663	0.633698	0.315	0.215	1
Uri1	0.0999304	-0.499477	0.12	0.204	1
Gpr137b	0.0999409	-0.599394	0.098	0.172	1
Dctn2	0.10008	-0.354332	0.065	0.14	1
Gm49144	0.100143	-0.697452	0.13	0.204	1
Cpsf2	0.100226	0.252405	0.109	0.043	1
Fance	0.100226	0.282911	0.109	0.043	1
Dzip3	0.100277	0.377355	0.261	0.151	1
Comt	0.100346	0.2704	0.348	0.226	1
Lrrfip1	0.100718	0.262813	0.283	0.172	1
Klhdc10	0.100718	-0.518698	0.185	0.269	1
Fgd6	0.100718	0.372903	0.283	0.172	1
Xrcc4	0.100718	0.33433	0.283	0.172	1
Shfl	0.101201	0.290813	0.174	0.086	1
Eng	0.10147	0.354844	0.109	0.043	1
Rps6kc1	0.101583	0.298418	0.315	0.194	1
Tmem164	0.102206	0.262457	0.554	0.409	1
Ripor2	0.102275	-0.467691	0.326	0.419	1
Psma3	0.102314	0.366087	0.315	0.204	1
Mbp	0.10232	-0.286259	0.63	0.677	1
Ralgapb	0.102353	0.316254	0.228	0.129	1
Vav1	0.102492	0.372254	0.391	0.258	1
Vps33a	0.103724	0.410426	0.217	0.129	1
Atp5b	0.103724	-0.475889	0.13	0.215	1
Pcyox1	0.103993	-0.331246	0.043	0.108	1
Srr	0.103993	0.280637	0.109	0.043	1
Map3k11	0.103993	-0.347899	0.043	0.108	1
Zc3h6	0.10416	-0.44571	0.054	0.118	1
Kifap3	0.104738	0.265625	0.185	0.097	1
Slc29a3	0.105179	0.270277	0.174	0.086	1
Tsix	0.105243	0.545984	0.467	0.366	1
Gm26542	0.105981	0.267247	0.446	0.301	1
Dcaf6	0.106034	0.29748	0.261	0.151	1
Mical2	0.106138	0.334329	0.141	0.065	1
Dcakd	0.106186	0.415152	0.25	0.151	1
Mef2a	0.106223	0.333488	0.761	0.645	1
Slc8a1	0.106458	0.256552	0.87	0.796	1
Clstn1	0.106582	0.369897	0.12	0.054	1
Cpeb3	0.107139	0.41798	0.337	0.215	1
Galc	0.107141	0.288816	0.272	0.161	1
Gm20528	0.107535	-0.617159	0.152	0.226	1
Vps13b	0.107547	-0.355383	0.576	0.624	1
Cox7c	0.107908	-0.595357	0.109	0.183	1
Prrc2b	0.108392	0.295593	0.272	0.161	1
Csnk2a2	0.108411	0.257312	0.141	0.065	1
Mpp1	0.108449	0.320499	0.196	0.108	1
Arrdc1	0.108556	-0.456082	0.065	0.129	1
Atp6v1b2	0.108667	0.29608	0.337	0.215	1
Sema6d	0.108895	0.324443	0.467	0.323	1
Baz1b	0.108907	0.35355	0.326	0.215	1
2510009E07Rik	0.109049	0.456337	0.12	0.054	1
Clec2d	0.110041	-0.487809	0.283	0.376	1
Rtcb	0.110619	-0.365604	0.076	0.151	1
Akap9	0.110894	-0.641229	0.283	0.344	1
Pcdh7	0.111019	0.335603	0.38	0.258	1
Dnajb14	0.111093	0.420791	0.239	0.14	1
Rbm4	0.111213	0.303763	0.185	0.097	1
Vapb	0.111307	-0.315317	0.065	0.14	1
Usp36	0.111561	-0.335533	0.054	0.118	1
Phf6	0.111561	0.439064	0.12	0.054	1
Ubb	0.112223	-0.402077	0.12	0.194	1
Xkr4	0.112418	-0.557638	0.228	0.29	1
Pla2g4a	0.112658	0.288142	0.326	0.204	1
Ppt1	0.112687	0.308476	0.228	0.129	1
Pkp4	0.11304	-0.485271	0.239	0.333	1
Pigk	0.113083	0.315764	0.272	0.161	1
Ube2q1	0.113341	-0.477879	0.065	0.129	1
Ppp1r10	0.113432	0.311545	0.152	0.075	1
Ptpn22	0.114118	0.452861	0.12	0.054	1
Txnip	0.11433	-0.609057	0.185	0.258	1
Ftl1	0.114782	-0.391836	0.13	0.215	1
Meis1	0.115067	-0.50095	0.098	0.172	1
Sh3bgrl	0.115199	0.269607	0.272	0.172	1
Atxn1	0.115688	0.267925	0.696	0.634	1
Mdm2	0.115743	0.40328	0.217	0.129	1
Wwp2	0.115887	0.276865	0.37	0.237	1
Prkca	0.116026	-0.4025	0.424	0.527	1
Scmh1	0.11647	-0.39934	0.261	0.355	1
Afg1l	0.116787	0.399052	0.25	0.151	1
Sgms1	0.116819	-0.411409	0.402	0.484	1
Arhgap15	0.117256	0.53732	0.685	0.624	1
Camk1	0.117706	0.323063	0.25	0.151	1
Atl2	0.117769	-0.391046	0.087	0.161	1
Blnk	0.117843	0.387676	0.207	0.118	1
Rabgap1l	0.117966	0.310445	0.315	0.215	1
Cpped1	0.11804	0.330484	0.12	0.054	1
Chpt1	0.118919	-0.466508	0.065	0.129	1
Plp1	0.119011	-0.338038	0.565	0.645	1
Mob4	0.119371	-0.330967	0.054	0.118	1
Psma1	0.119553	0.369362	0.13	0.065	1
Atrn	0.119622	-0.422908	0.185	0.258	1
Fyco1	0.119654	0.40503	0.217	0.129	1
Nhlrc2	0.119866	0.280274	0.207	0.118	1
Atg4c	0.11994	0.293615	0.174	0.097	1
Sec24a	0.120888	0.335802	0.207	0.118	1
Fam135a	0.120924	-0.534242	0.087	0.151	1
Arl15	0.1215	0.302169	0.435	0.312	1
Siglech	0.121609	0.441199	0.152	0.075	1
Rab5c	0.121758	0.35157	0.163	0.086	1
Dleu2	0.122011	0.265034	0.848	0.731	1
Suco	0.122165	0.30761	0.196	0.108	1
Zfp62	0.122375	-0.584791	0.12	0.194	1
Cdyl2	0.122698	0.443925	0.196	0.108	1
Smarcad1	0.122747	-0.439296	0.207	0.29	1
4930444A19Rik	0.122824	-0.548625	0.141	0.215	1
Gopc	0.122917	0.399391	0.163	0.086	1
Cbfb	0.123156	0.317674	0.348	0.226	1
Nsd1	0.123177	-0.344439	0.609	0.677	1
Set	0.123433	0.255992	0.12	0.054	1
Zfp385b	0.123433	0.278514	0.12	0.054	1
Smarcb1	0.123433	0.325195	0.12	0.054	1
Stk17b	0.1237	-0.45261	0.196	0.28	1
Tmem65	0.124084	0.448897	0.163	0.086	1
Rbm26	0.124471	-0.321277	0.478	0.57	1
mt-Atp6	0.12454	-0.865621	0.076	0.14	1
Clptm1	0.124712	0.365067	0.13	0.065	1
Zfp810	0.124712	0.348613	0.13	0.065	1
Ssh2	0.124871	0.285066	0.902	0.806	1
Limk2	0.12526	0.30004	0.163	0.086	1
Nipsnap2	0.125565	-0.463717	0.152	0.237	1
Snhg14	0.125745	0.251829	0.272	0.161	1
Wasf2	0.125989	-0.388975	0.63	0.667	1
C9orf72	0.126028	-0.40885	0.065	0.129	1
Tafa2	0.126028	0.370812	0.13	0.065	1
Smim4	0.126028	0.40827	0.13	0.065	1
Cuedc2	0.1262	0.357268	0.12	0.054	1
Dis3l2	0.126257	0.414541	0.391	0.269	1
Ofd1	0.126889	-0.528557	0.087	0.151	1
Cep83	0.127027	0.285455	0.196	0.108	1
Lrrc45	0.127027	0.322885	0.196	0.108	1
Ptpn2	0.127262	-0.538025	0.152	0.226	1
Stip1	0.127603	0.264322	0.12	0.054	1
Fez2	0.128127	0.293798	0.196	0.108	1
Anapc10	0.128234	0.333596	0.207	0.118	1
mt-Co3	0.128234	-0.317306	0.12	0.204	1
Tbc1d23	0.128305	-0.38821	0.293	0.366	1
Bnip3l	0.128694	-0.482045	0.065	0.129	1
Fbxw4	0.128718	0.26744	0.391	0.269	1
Phf21a	0.128861	0.337495	0.696	0.624	1
Lcorl	0.129571	0.343614	0.489	0.376	1
Gm44686	0.130297	-0.52869	0.152	0.226	1
Ankrd13c	0.130395	0.253825	0.207	0.118	1
Polr3e	0.130443	-0.358054	0.054	0.118	1
Smad3	0.130669	0.472624	0.261	0.161	1
Zfp362	0.13127	0.270733	0.163	0.086	1
Ddx24	0.13127	0.334863	0.163	0.086	1
Atl3	0.13127	0.324439	0.163	0.086	1
Syncrip	0.131292	0.271588	0.315	0.204	1
Gapvd1	0.131595	0.351906	0.652	0.538	1
Nlk	0.131598	0.304236	0.457	0.323	1
Cct3	0.131881	-0.274656	0.054	0.118	1
Slc25a45	0.131881	0.297193	0.12	0.054	1
Cox8a	0.132214	-0.470569	0.076	0.14	1
Smap1	0.132663	-0.627619	0.228	0.29	1
Rmst	0.133528	-0.650621	0.076	0.14	1
Pbx1	0.133672	0.431208	0.478	0.366	1
Mterf3	0.134794	0.259616	0.12	0.054	1
Nol4l	0.134802	0.309166	0.207	0.118	1
Tasp1	0.135549	-0.354858	0.065	0.129	1
Mrpl33	0.135549	-0.336233	0.065	0.129	1
Map3k7	0.135643	0.277357	0.261	0.161	1
Stim1	0.13579	0.311537	0.272	0.183	1
Ptprt	0.137048	0.323023	0.207	0.118	1
Ank	0.137626	0.317367	0.185	0.108	1
Cd99l2	0.137757	-0.293074	0.054	0.118	1
Pdpk1	0.138032	-0.433666	0.25	0.323	1
Mdfic	0.138489	0.331155	0.337	0.237	1
Fam133b	0.138814	0.442449	0.185	0.108	1
Fancl	0.13951	0.385328	0.196	0.118	1
Rbl2	0.139625	-0.325164	0.141	0.215	1
Gtf3c1	0.141234	0.250997	0.13	0.065	1
Exd2	0.141234	0.301891	0.13	0.065	1
Mapk1	0.141348	-0.429521	0.283	0.355	1
A230057D06Rik	0.14154	-0.359293	0.174	0.258	1
Sidt2	0.141956	0.292228	0.13	0.065	1
Mast2	0.142438	-0.503072	0.12	0.194	1
Clk2	0.14301	0.381286	0.141	0.075	1
Magt1	0.14301	0.304223	0.141	0.075	1
Resf1	0.14304	-0.291524	0.13	0.215	1
Sptan1	0.143288	-0.443755	0.196	0.269	1
Casp4	0.144406	0.34532	0.141	0.075	1
Smg6	0.144598	-0.461062	0.457	0.495	1
Fam222b	0.144963	0.31492	0.261	0.161	1
Fbxo38	0.144993	0.28587	0.228	0.14	1
Brwd1	0.145059	0.305875	0.413	0.29	1
Cct7	0.145364	-0.479616	0.054	0.108	1
B230219D22Rik	0.145616	0.259555	0.13	0.065	1
Zfp934	0.146116	0.393487	0.185	0.108	1
Atg5	0.146323	0.253711	0.207	0.118	1
Prpf39	0.146468	0.253572	0.326	0.215	1
Bin1	0.146863	0.358456	0.511	0.387	1
Anapc16	0.147229	-0.400842	0.076	0.14	1
Srcin1	0.147229	-0.42475	0.076	0.14	1
Uty	0.14725	-0.297539	0.141	0.226	1
Srrm2	0.147291	0.277826	0.772	0.656	1
Kifc2	0.148595	0.360157	0.13	0.065	1
Trim5	0.148595	0.404472	0.13	0.065	1
Phtf1	0.148656	-0.367694	0.076	0.14	1
Cst3	0.148777	-0.261906	0.576	0.591	1
Fgfr2	0.149395	-0.42926	0.424	0.473	1
Dnmt3a	0.149503	0.284168	0.63	0.484	1
Large1	0.150046	0.339035	0.424	0.323	1
Stau1	0.150621	-0.494328	0.174	0.237	1
Nfe2l2	0.151291	0.486894	0.337	0.237	1
Ttc3	0.151397	0.29321	0.587	0.452	1
Unk	0.151542	0.317283	0.141	0.075	1
Rexo4	0.151621	0.25387	0.13	0.065	1
Htr1f	0.151621	0.257307	0.13	0.065	1
Ctsl	0.152423	0.285403	0.185	0.108	1
Marc2	0.153151	-0.303119	0.065	0.129	1
Bcl10	0.153151	0.277573	0.13	0.065	1
Tle4	0.153484	0.337677	0.554	0.43	1
Anxa3	0.155517	0.401297	0.293	0.204	1
Tmem191c	0.15663	-0.533246	0.065	0.118	1
Arid1a	0.157767	0.290403	0.457	0.344	1
Csgalnact2	0.15863	-0.390984	0.054	0.108	1
Katna1	0.15863	-0.390816	0.054	0.108	1
Samd8	0.158944	-0.287142	0.076	0.14	1
Aoah	0.159104	-0.273323	0.674	0.731	1
Ppig	0.159658	0.35557	0.25	0.161	1
Pnpla7	0.159801	0.313154	0.576	0.441	1
Dync1li1	0.159967	0.449537	0.217	0.14	1
Atp6v1e1	0.160142	0.270121	0.228	0.14	1
Fam120c	0.16035	-0.366747	0.054	0.108	1
A630001G21Rik	0.160499	0.274819	0.359	0.247	1
Trem2	0.160943	0.422611	0.174	0.108	1
Atrx	0.161124	-0.319273	0.554	0.516	1
Ing4	0.161125	-0.458467	0.13	0.194	1
Acrbp	0.161216	0.369646	0.109	0.054	1
Tec	0.161236	0.291571	0.391	0.269	1
Rasa2	0.161661	0.318894	0.196	0.118	1
Kat7	0.161669	0.34856	0.152	0.086	1
Fgf13	0.161669	0.55649	0.152	0.086	1
Pitpnb	0.16198	0.3093	0.141	0.075	1
Heatr5a	0.162691	0.48358	0.413	0.312	1
Ptpn12	0.16301	0.405071	0.272	0.194	1
Alkbh1	0.163168	-0.425152	0.098	0.161	1
Kndc1	0.163514	-0.398962	0.076	0.14	1
Mto1	0.163514	0.307519	0.141	0.075	1
Rrn3	0.163514	0.308125	0.141	0.075	1
Ap3b1	0.163789	0.272052	0.565	0.462	1
Btbd3	0.163835	-0.425651	0.054	0.108	1
Gdap2	0.163835	-0.465863	0.054	0.108	1
Tnrc18	0.163919	0.364399	0.511	0.387	1
Crtc3	0.164568	-0.41389	0.207	0.28	1
Cadm1	0.164951	0.658637	0.283	0.194	1
Mnat1	0.165058	0.27672	0.272	0.172	1
Lmbr1	0.16506	0.276159	0.141	0.075	1
Jade2	0.165598	-0.366373	0.054	0.108	1
Ccdc191	0.165931	-0.663884	0.141	0.204	1
Ppia	0.166106	0.402786	0.152	0.086	1
Crebbp	0.166431	-0.327031	0.5	0.559	1
Ctsd	0.167081	0.252648	0.402	0.29	1
Ywhah	0.167605	0.31535	0.152	0.086	1
Plekhg5	0.167715	-0.402677	0.522	0.548	1
Mta1	0.168269	0.313509	0.109	0.054	1
Snhg11	0.168538	-0.30858	0.717	0.71	1
March2	0.169243	-0.349178	0.109	0.172	1
Sh3d19	0.1696	-0.462963	0.13	0.194	1
Irgm2	0.169761	0.265229	0.141	0.075	1
Ccdc57	0.169859	-0.418989	0.065	0.118	1
Siglec1	0.169911	-0.255352	0.098	0.172	1
Inpp4b	0.169955	0.335665	0.587	0.484	1
Amy1	0.170068	0.332455	0.109	0.054	1
Rap1gap	0.170068	0.297783	0.109	0.054	1
Cops3	0.170633	0.336497	0.152	0.086	1
Pdhx	0.170973	-0.547486	0.054	0.108	1
Usp53	0.170973	-0.378653	0.054	0.108	1
Glud1	0.171004	-0.367941	0.174	0.247	1
Gna13	0.171028	0.29657	0.239	0.151	1
Adam10	0.171271	0.322414	0.272	0.183	1
Myo18a	0.171271	0.311109	0.272	0.183	1
Ttc8	0.171351	-0.330493	0.076	0.14	1
Tmem50a	0.171881	0.317815	0.109	0.054	1
Elp3	0.171881	0.337815	0.109	0.054	1
Cacna1e	0.17208	-0.385372	0.109	0.172	1
Snhg20	0.17208	-0.412462	0.109	0.172	1
Rogdi	0.172162	-0.321625	0.087	0.151	1
Tsc22d3	0.172271	-0.40344	0.272	0.344	1
A330076H08Rik	0.172584	0.292187	0.185	0.108	1
Riok2	0.172951	0.44473	0.141	0.075	1
Pi4ka	0.173037	0.296308	0.293	0.194	1
Eif3e	0.173293	-0.473878	0.065	0.118	1
Ide	0.173703	0.253696	0.152	0.086	1
Sh3gl3	0.173709	0.439037	0.109	0.054	1
Ythdc2	0.173869	-0.456126	0.152	0.215	1
Otud7b	0.174088	-0.298813	0.196	0.28	1
Slc16a10	0.174394	0.356848	0.315	0.215	1
Vcan	0.174628	-0.517087	0.054	0.108	1
Clic1	0.174644	-0.538138	0.174	0.247	1
Prdm2	0.174813	0.306626	0.272	0.183	1
Mrpl23	0.175029	-0.379306	0.065	0.118	1
Pdhb	0.175029	-0.528649	0.065	0.118	1
Ctnnd2	0.175038	0.394861	0.424	0.301	1
Usf2	0.175063	0.283003	0.196	0.118	1
Baz2a	0.175063	0.325924	0.196	0.118	1
Sh3bp5	0.175161	0.288639	0.217	0.14	1
Kcnh7	0.177087	-0.495794	0.12	0.183	1
4930469K13Rik	0.177407	0.263704	0.109	0.054	1
Smarce1	0.177407	0.266131	0.109	0.054	1
Lyz2	0.177595	-0.516726	0.217	0.29	1
Oxr1	0.178024	0.413497	0.5	0.398	1
Cd55	0.178341	-0.354791	0.054	0.108	1
Pcsk2	0.178384	0.334268	0.152	0.086	1
mt-Co2	0.178504	-0.443279	0.12	0.183	1
Mier1	0.178962	0.252546	0.38	0.269	1
Ap2a2	0.179221	-0.339499	0.587	0.634	1
8030453O22Rik	0.179278	0.30297	0.109	0.054	1
Mblac2	0.179278	0.335519	0.109	0.054	1
Furin	0.179349	-0.385643	0.098	0.161	1
Lacc1	0.179484	0.344548	0.207	0.129	1
Pde7a	0.179857	0.501532	0.391	0.301	1
Mia3	0.17989	0.28845	0.239	0.151	1
Araf	0.17993	-0.3841	0.12	0.183	1
Nhsl2	0.1802	-0.5068	0.152	0.226	1
Klhl2	0.180392	-0.439171	0.152	0.215	1
Tada2a	0.181209	0.471456	0.12	0.065	1
Abcd2	0.181483	0.443272	0.25	0.161	1
Ythdc1	0.181601	-0.493806	0.272	0.333	1
9930021J03Rik	0.181801	0.272594	0.337	0.247	1
R3hdm1	0.182286	0.310362	0.543	0.419	1
Supt6	0.182289	-0.442032	0.109	0.172	1
Wapl	0.182995	0.266855	0.467	0.355	1
March7	0.183028	0.253057	0.402	0.29	1
Nub1	0.183158	0.252687	0.152	0.086	1
Btbd1	0.183622	-0.360713	0.283	0.355	1
Gm26714	0.183828	0.402655	0.217	0.14	1
Ap3s1	0.183907	-0.255163	0.065	0.118	1
Specc1l	0.184043	0.342516	0.326	0.237	1
Iqgap1	0.184043	0.335407	0.326	0.237	1
Hnrnpf	0.184508	-0.533979	0.152	0.204	1
Homer1	0.184771	0.386652	0.152	0.086	1
Xrn2	0.185165	-0.323544	0.315	0.376	1
Sorbs2	0.185286	-0.401997	0.109	0.172	1
Esco1	0.185739	-0.381179	0.152	0.215	1
Zcchc24	0.185943	-0.265946	0.054	0.108	1
Desi2	0.186118	0.28483	0.272	0.172	1
Depdc5	0.186149	0.326589	0.228	0.151	1
Dnajc24	0.186369	0.289864	0.196	0.118	1
9530059O14Rik	0.186427	-0.459384	0.163	0.226	1
4931406C07Rik	0.18691	0.345178	0.109	0.054	1
March5	0.187088	0.289475	0.163	0.097	1
Mndal	0.187185	-0.424378	0.272	0.333	1
Dctn4	0.187245	0.357546	0.217	0.14	1
R3hdm2	0.187346	-0.281118	0.326	0.409	1
Fkbp9	0.18755	-0.479463	0.065	0.118	1
Fcgr1	0.188664	-0.422869	0.098	0.161	1
Fars2	0.189491	0.330623	0.424	0.333	1
Unc5c	0.190057	-0.40643	0.272	0.355	1
Fktn	0.190815	0.258114	0.109	0.054	1
Crbn	0.190815	0.254055	0.109	0.054	1
Hspa5	0.191156	-0.370314	0.13	0.194	1
Tiprl	0.191246	-0.309065	0.065	0.118	1
Lmln	0.191641	-0.337603	0.12	0.183	1
Lyl1	0.191864	-0.400216	0.174	0.237	1
Kif1c	0.192178	0.335364	0.12	0.065	1
Ppp1r2	0.192553	-0.407098	0.076	0.129	1
Tuba1a	0.192588	-0.399005	0.152	0.215	1
H13	0.19299	0.259699	0.152	0.086	1
Vamp2	0.19299	0.254259	0.152	0.086	1
Thoc1	0.19299	0.313039	0.152	0.086	1
Srek1	0.193251	0.32836	0.402	0.301	1
Zfp236	0.194123	0.290398	0.261	0.172	1
Pacs2	0.194551	-0.396091	0.25	0.312	1
Dalrd3	0.194995	-0.397216	0.065	0.118	1
Fech	0.194995	-0.327811	0.065	0.118	1
Ccdc186	0.195069	0.289687	0.163	0.097	1
Plekho1	0.195948	0.285551	0.435	0.323	1
Cask	0.196118	-0.279116	0.413	0.484	1
Rpl11	0.196135	-0.487948	0.076	0.129	1
Dgkh	0.196695	0.266306	0.163	0.097	1
Iffo2	0.19689	-0.309414	0.065	0.118	1
Cdr1os	0.197702	-0.335168	0.12	0.183	1
Evi5l	0.197842	0.447284	0.12	0.065	1
Hivep2	0.198533	0.33146	0.478	0.366	1
Epo	0.198631	-0.424511	0.163	0.226	1
Hecw2	0.198798	-0.466462	0.065	0.118	1
Cntrl	0.199359	-0.278852	0.25	0.312	1
Slc6a1	0.19971	-0.492026	0.109	0.161	1
Vasp	0.199757	0.37529	0.12	0.065	1
Tmem241	0.199887	0.322528	0.228	0.151	1
Cox16	0.200138	-0.405662	0.38	0.462	1
Vwa8	0.201527	0.361502	0.196	0.129	1
Tenm1	0.201601	-0.3804	0.076	0.129	1
Mtmr14	0.201685	0.294386	0.12	0.065	1
Gdpd5	0.201686	0.377353	0.12	0.065	1
Map3k5	0.202636	0.368329	0.652	0.559	1
Ptprk	0.202645	-0.444492	0.478	0.516	1
Adss	0.202655	-0.364268	0.065	0.118	1
Hnrnph3	0.203023	0.258343	0.337	0.226	1
Tpd52	0.203659	0.277049	0.391	0.28	1
Phactr4	0.203903	0.354267	0.185	0.118	1
Map1lc3b	0.204604	-0.28474	0.065	0.118	1
Nae1	0.205306	-0.366692	0.076	0.129	1
Morf4l2	0.205306	-0.339575	0.076	0.129	1
Unc80	0.205583	0.330966	0.12	0.065	1
Stimate	0.205583	0.261312	0.12	0.065	1
Tmem161b	0.20577	0.289536	0.217	0.14	1
Arl10	0.205951	-0.390591	0.098	0.151	1
Psen1	0.206027	0.487908	0.207	0.14	1
Fam118b	0.206276	-0.437773	0.087	0.14	1
Dynll1	0.206566	-0.29363	0.065	0.118	1
Stk11	0.207177	-0.366335	0.076	0.129	1
Snx11	0.207177	-0.433282	0.076	0.129	1
Cmklr1	0.207718	-0.330931	0.207	0.269	1
Csf3r	0.207729	0.474657	0.239	0.161	1
Smad4	0.207822	-0.320803	0.196	0.258	1
Shld1	0.208117	0.28641	0.13	0.075	1
Suclg2	0.208355	0.303646	0.163	0.097	1
Cdc73	0.208646	-0.351871	0.12	0.183	1
Wbp11	0.20906	-0.425526	0.076	0.129	1
Gpatch8	0.209837	0.304313	0.587	0.452	1
Dse	0.210537	-0.258637	0.63	0.656	1
Snta1	0.211852	-0.512319	0.196	0.247	1
Trappc6b	0.212169	-0.447621	0.13	0.183	1
Msl2	0.213526	-0.515655	0.087	0.14	1
Agtpbp1	0.213921	0.267799	0.174	0.108	1
Prox1	0.214445	0.340288	0.141	0.086	1
Zfp804a	0.214551	0.319773	0.12	0.065	1
Ezh2	0.214671	-0.422269	0.098	0.151	1
Timm10b	0.214784	-0.360526	0.076	0.129	1
Ntrk2	0.217276	0.428541	0.228	0.161	1
Hace1	0.21837	-0.257497	0.12	0.183	1
Kcnc2	0.218642	0.323633	0.196	0.129	1
Rab14	0.218809	0.328742	0.435	0.344	1
Cyld	0.219027	-0.483288	0.239	0.29	1
Pkn1	0.219467	0.288051	0.391	0.301	1
Gcnt1	0.21964	0.263926	0.13	0.075	1
Hnrnpd	0.220252	-0.406423	0.163	0.226	1
Maco1	0.220356	0.326624	0.304	0.226	1
Ntsr2	0.220686	-0.30073	0.065	0.118	1
Luc7l2	0.220746	0.332828	0.793	0.71	1
Vdac2	0.2219	0.413161	0.141	0.086	1
Il4ra	0.222653	0.433982	0.239	0.172	1
Unc13b	0.223345	-0.443903	0.109	0.161	1
Sept7	0.223512	-0.41244	0.38	0.419	1
Slc23a2	0.223529	-0.518926	0.283	0.333	1
Sbds	0.223581	0.255315	0.13	0.075	1
Anapc15	0.224282	0.30316	0.543	0.441	1
Acin1	0.224455	0.377658	0.413	0.333	1
Nfu1	0.224574	-0.282835	0.076	0.129	1
Ints8	0.224916	0.295979	0.228	0.151	1
Pank2	0.225117	-0.33668	0.13	0.194	1
Apobec3	0.225601	-0.387348	0.326	0.366	1
Phactr2	0.22579	0.367567	0.424	0.333	1
Tmem59	0.226126	0.301424	0.207	0.14	1
Coq8b	0.226652	-0.305443	0.087	0.14	1
Dhdds	0.226879	-0.478882	0.109	0.161	1
Pde3b	0.227124	0.251761	0.598	0.452	1
Galnt7	0.227172	0.257402	0.217	0.14	1
Parp11	0.227571	0.257408	0.13	0.075	1
C1qb	0.228208	-0.327421	0.565	0.559	1
Gtf2a2	0.228415	0.298192	0.185	0.118	1
Nckap1l	0.228627	0.285924	0.5	0.398	1
Map3k8	0.229494	0.290999	0.163	0.097	1
Psap	0.231043	-0.33573	0.457	0.495	1
St6galnac5	0.231613	0.25483	0.13	0.075	1
Trmt1l	0.231729	-0.354357	0.13	0.194	1
Gm4258	0.231878	-0.256165	0.37	0.43	1
Mtor	0.23245	-0.392141	0.087	0.14	1
Snx5	0.233451	0.265812	0.62	0.516	1
Agk	0.233653	0.30462	0.13	0.075	1
Slc30a6	0.233653	0.260917	0.13	0.075	1
Trps1	0.235113	0.33109	0.674	0.57	1
Rpl10	0.235729	0.380196	0.152	0.097	1
Trf	0.23608	-0.269389	0.391	0.452	1
Ikzf1	0.236249	0.289034	0.565	0.43	1
Parp12	0.236677	-0.38525	0.098	0.151	1
Igsf6	0.237763	-0.374099	0.12	0.172	1
Rbbp8	0.238938	-0.505871	0.239	0.28	1
Pdia6	0.239544	-0.528036	0.12	0.172	1
Dph6	0.239849	0.255708	0.13	0.075	1
Gm10441	0.239849	0.301845	0.13	0.075	1
Dcaf17	0.240315	-0.401652	0.163	0.226	1
Sin3b	0.240494	-0.33403	0.098	0.151	1
Magi3	0.240545	0.288303	0.185	0.118	1
Tpt1	0.240618	0.398678	0.163	0.097	1
Scfd1	0.240849	-0.286476	0.152	0.215	1
Arhgef3	0.241752	0.353384	0.652	0.559	1
Strada	0.243284	0.278644	0.25	0.172	1
Ppp1r13b	0.243352	0.295307	0.141	0.086	1
Daam2	0.24436	-0.340259	0.087	0.14	1
Txndc16	0.244486	0.336506	0.337	0.258	1
Bcap31	0.244774	-0.499247	0.065	0.108	1
Mgat5	0.245005	0.453713	0.413	0.333	1
Cspg5	0.245143	-0.368004	0.109	0.161	1
Baiap2	0.24571	-0.366406	0.13	0.183	1
Afap1l1	0.245965	-0.418933	0.272	0.333	1
Cbx5	0.247025	-0.331872	0.109	0.161	1
Mgmt	0.247681	0.386804	0.174	0.118	1
Ptpn9	0.248794	-0.522127	0.163	0.215	1
3110056K07Rik	0.248917	-0.342505	0.109	0.161	1
Sh3glb2	0.249374	-0.399718	0.065	0.108	1
Ms4a6b	0.24989	-0.290425	0.478	0.516	1
Sh3bp2	0.250435	-0.338033	0.12	0.172	1
Plcl2	0.250495	0.384427	0.543	0.495	1
Trim12a	0.251215	0.317702	0.152	0.097	1
Rac1	0.251862	-0.483987	0.174	0.226	1
Pdlim5	0.252171	-0.400063	0.413	0.43	1
Ppp6r3	0.252841	0.294856	0.359	0.269	1
Lrba	0.25414	-0.26332	0.12	0.172	1
Vmp1	0.254149	-0.522677	0.272	0.312	1
Mbd2	0.254937	0.332523	0.228	0.161	1
Mms19	0.255164	-0.478848	0.261	0.301	1
Tcf12	0.255571	0.283725	0.63	0.559	1
Pdcd6ip	0.255576	-0.263355	0.261	0.323	1
Cops4	0.256693	-0.294782	0.087	0.14	1
Man1c1	0.256888	0.299385	0.609	0.505	1
Pibf1	0.257418	0.28579	0.424	0.323	1
Cd86	0.257599	-0.281762	0.522	0.57	1
Stk3	0.257774	0.365378	0.489	0.409	1
Actr8	0.258754	-0.408505	0.065	0.108	1
Sirt2	0.259081	-0.327835	0.196	0.258	1
Slc16a6	0.259579	0.284126	0.293	0.215	1
Zfp280c	0.259714	0.298113	0.207	0.14	1
Zadh2	0.260231	-0.294556	0.098	0.151	1
Nxph1	0.260512	0.271839	0.185	0.118	1
Rps10	0.261247	0.283179	0.152	0.097	1
Ubn2	0.263369	-0.406065	0.435	0.452	1
Rasa3	0.263428	0.302121	0.239	0.161	1
Zfp282	0.26515	-0.322763	0.087	0.14	1
Slit1	0.265406	0.298719	0.163	0.108	1
Slc36a1	0.266221	0.283267	0.141	0.086	1
Mysm1	0.267383	-0.338724	0.217	0.28	1
Dot1l	0.267397	0.329791	0.152	0.097	1
Rps15	0.267409	-0.349484	0.12	0.172	1
Zfp740	0.267464	-0.27186	0.152	0.204	1
Cldn11	0.268376	-0.462988	0.065	0.108	1
Map1b	0.268425	0.254177	0.239	0.172	1
Zfyve16	0.268426	-0.288896	0.174	0.237	1
Mllt10	0.269361	-0.316551	0.522	0.548	1
Lncpint	0.26937	-0.449596	0.402	0.43	1
Tmeff2	0.269476	-0.291392	0.663	0.667	1
C4b	0.27014	-0.681605	0.076	0.118	1
Epn1	0.270577	-0.332741	0.141	0.194	1
Shisa4	0.270819	-0.40306	0.065	0.108	1
Gpi1	0.272654	-0.281144	0.174	0.237	1
Rab3gap1	0.273064	0.323793	0.348	0.258	1
Secisbp2	0.274178	-0.530698	0.109	0.151	1
Capn7	0.274221	0.281739	0.174	0.118	1
Atxn2	0.274309	-0.325125	0.391	0.409	1
Tacc1	0.274309	0.284185	0.446	0.355	1
Kbtbd2	0.274494	-0.379717	0.087	0.129	1
D430042O09Rik	0.275097	0.287419	0.185	0.129	1
Naa25	0.27716	0.292046	0.12	0.075	1
Rad54l2	0.277867	0.304213	0.152	0.097	1
Camkmt	0.27797	0.294218	0.185	0.129	1
Tmem135	0.278877	0.261171	0.315	0.237	1
Arhgap26	0.278894	-0.310458	0.163	0.226	1
Fam173a	0.279157	-0.348206	0.12	0.172	1
Rnf14	0.279157	-0.353253	0.12	0.172	1
Dnajc7	0.280362	0.35577	0.38	0.301	1
Sub1	0.280745	-0.27734	0.065	0.108	1
Anapc1	0.281149	-0.301682	0.12	0.172	1
Ints2	0.281262	-0.442683	0.087	0.129	1
Rcc2	0.281745	-0.342065	0.141	0.194	1
Kansl1l	0.28201	0.309986	0.424	0.333	1
Abhd12	0.283437	0.302436	0.576	0.473	1
Ppm1b	0.284154	0.268192	0.174	0.118	1
Ryr3	0.284304	0.348039	0.12	0.075	1
Lrrc28	0.284304	-0.395935	0.076	0.118	1
Ap3m1	0.285799	0.278909	0.109	0.065	1
Prex2	0.286442	0.267076	0.152	0.097	1
Ccdc141	0.286713	-0.445459	0.076	0.118	1
Plekha1	0.287623	-0.483647	0.293	0.333	1
Ints9	0.288142	-0.40025	0.087	0.129	1
A830018L16Rik	0.28835	-0.279051	0.065	0.108	1
Aldh2	0.28835	-0.314485	0.065	0.108	1
Galnt10	0.289426	-0.30883	0.283	0.333	1
Sema4a	0.289522	-0.270728	0.228	0.28	1
Fbxo34	0.289941	0.320874	0.163	0.108	1
Arhgap12	0.289978	-0.298495	0.446	0.505	1
Ap2a1	0.290351	-0.376324	0.076	0.118	1
Kif13a	0.290875	-0.41408	0.337	0.376	1
Nfkbiz	0.290915	0.425004	0.109	0.065	1
Pten	0.291476	0.328269	0.511	0.419	1
Klhl15	0.291572	-0.30325	0.076	0.118	1
Zdhhc6	0.293496	-0.351133	0.065	0.108	1
Sgk3	0.293794	-0.567813	0.337	0.366	1
Med26	0.294022	-0.367333	0.076	0.118	1
Adam17	0.294302	0.259981	0.304	0.226	1
Inpp5f	0.295349	-0.478579	0.109	0.151	1
Taf1b	0.296997	-0.350488	0.098	0.14	1
Hnrnpa3	0.297763	-0.367315	0.25	0.29	1
Serbp1	0.298541	-0.3598	0.152	0.194	1
Phactr1	0.299451	-0.425802	0.359	0.387	1
Glis3	0.301729	-0.30767	0.163	0.215	1
Nlrc4	0.301828	-0.407307	0.293	0.323	1
Tef	0.30247	-0.437255	0.174	0.215	1
Dhx15	0.30252	-0.330609	0.239	0.29	1
Cyth4	0.302699	0.280367	0.533	0.441	1
B3galt1	0.303183	0.338588	0.25	0.183	1
Spast	0.303245	-0.382573	0.228	0.269	1
Mapkap1	0.304442	0.306437	0.359	0.29	1
C2cd5	0.304596	-0.358696	0.152	0.204	1
Appl1	0.305885	-0.407301	0.13	0.172	1
Zfp1	0.307042	-0.364586	0.087	0.129	1
Mgrn1	0.307408	-0.276538	0.163	0.215	1
Nono	0.308003	0.254319	0.196	0.14	1
Afg3l2	0.308249	-0.419324	0.087	0.129	1
Cdh11	0.308455	-0.394165	0.098	0.14	1
Snx1	0.308977	0.275463	0.174	0.118	1
Heatr5b	0.30946	-0.301891	0.087	0.129	1
Ik	0.309467	0.285104	0.207	0.151	1
Tsga10	0.309888	0.26164	0.185	0.129	1
Tcf7l2	0.311143	-0.267672	0.424	0.484	1
Cry2	0.311558	-0.290658	0.076	0.118	1
Tsnax	0.311558	-0.33162	0.076	0.118	1
Pxn	0.311822	0.261352	0.283	0.215	1
Rps18	0.311892	-0.347876	0.087	0.129	1
Nav3	0.31352	-0.448017	0.25	0.301	1
Stx2	0.314118	-0.341857	0.076	0.118	1
Jam3	0.314336	0.345304	0.13	0.086	1
Cmtm6	0.314336	-0.286626	0.087	0.129	1
Sugct	0.3154	0.268923	0.174	0.118	1
Phlpp2	0.315468	-0.332006	0.098	0.14	1
Ankrd28	0.315468	-0.420035	0.098	0.14	1
Ccdc50	0.316187	0.316315	0.5	0.409	1
Wars2	0.316792	0.317179	0.13	0.086	1
Ube2r2	0.318388	0.264166	0.239	0.172	1
Dlgap1	0.318911	0.407385	0.391	0.312	1
Prkd1	0.320146	-0.264713	0.065	0.108	1
Tpr	0.321308	-0.397389	0.511	0.505	1
Calm2	0.321336	-0.301731	0.326	0.355	1
Ell	0.322164	-0.287012	0.109	0.151	1
Arhgef10l	0.322236	0.327857	0.196	0.14	1
Rcn2	0.322584	-0.337483	0.098	0.14	1
Lgals9	0.322584	0.481225	0.141	0.097	1
Rgs7bp	0.322689	-0.278618	0.261	0.301	1
Cd300c2	0.324202	-0.361041	0.163	0.204	1
Xndc1	0.324237	-0.257211	0.087	0.129	1
Chchd3	0.324346	0.426614	0.283	0.226	1
Inpp4a	0.325462	0.294647	0.293	0.237	1
Zfp36l1	0.326539	-0.292351	0.435	0.452	1
Ctnnb1	0.326782	-0.389766	0.109	0.151	1
Zfc3h1	0.326921	0.287351	0.37	0.312	1
Gm3764	0.327103	0.302158	0.315	0.237	1
Cd209f	0.327127	0.27976	0.12	0.075	1
Ptn	0.329515	-0.42501	0.261	0.301	1
Cers5	0.329687	-0.422974	0.12	0.161	1
Hs6st1	0.331524	-0.270364	0.13	0.172	1
Dnm1l	0.332569	-0.26146	0.174	0.226	1
Il16	0.333354	-0.367477	0.239	0.29	1
Ttll5	0.333721	-0.311461	0.13	0.172	1
Rapgef1	0.335112	-0.482376	0.207	0.247	1
Trappc10	0.335112	-0.345242	0.207	0.247	1
Aatf	0.33583	0.293429	0.196	0.14	1
Xist	0.336628	0.266884	0.696	0.581	1
Rpl3	0.337129	-0.333467	0.098	0.14	1
Hmgxb3	0.337129	-0.299894	0.098	0.14	1
Ndfip2	0.338518	-0.304786	0.109	0.151	1
Fry	0.338604	0.252239	0.424	0.344	1
Enah	0.339466	-0.296252	0.087	0.129	1
5430405H02Rik	0.339594	-0.330977	0.098	0.14	1
Sipa1	0.340406	-0.324139	0.196	0.237	1
Srsf6	0.340473	0.285922	0.293	0.237	1
Eif2a	0.343286	-0.28118	0.109	0.151	1
Erp44	0.343395	-0.314242	0.12	0.161	1
Efr3a	0.343977	-0.378578	0.174	0.204	1
Lifr	0.347233	-0.380741	0.511	0.516	1
Arf4	0.348044	0.349229	0.163	0.118	1
Eif4g1	0.349082	-0.404818	0.261	0.29	1
March3	0.34917	-0.466357	0.196	0.237	1
Ankle2	0.349581	-0.270068	0.152	0.194	1
Trit1	0.350383	-0.277198	0.12	0.161	1
Tardbp	0.351814	-0.406631	0.283	0.312	1
Nck1	0.352089	0.269388	0.141	0.097	1
Naa60	0.352089	-0.252706	0.098	0.14	1
Pml	0.352733	-0.320596	0.12	0.161	1
Ctdspl	0.352733	-0.398026	0.12	0.161	1
Aatk	0.35311	-0.376583	0.196	0.237	1
Cdk9	0.354262	-0.301622	0.141	0.183	1
Rngtt	0.35501	-0.31727	0.272	0.312	1
Ftx	0.355394	-0.30954	0.109	0.151	1
Il1rapl1	0.35656	-0.286752	0.511	0.527	1
Tgfbi	0.357366	-0.392274	0.293	0.312	1
Lmbrd2	0.357461	0.347149	0.163	0.118	1
Crim1	0.357461	-0.50757	0.12	0.161	1
Zcchc8	0.358513	0.312419	0.174	0.129	1
Atf2	0.358692	0.264196	0.293	0.237	1
Hexa	0.358921	-0.323199	0.348	0.376	1
Mfsd11	0.359621	-0.429153	0.185	0.226	1
Eif3c	0.359725	0.255522	0.141	0.097	1
Cbfa2t2	0.361233	0.335694	0.359	0.28	1
Atp6v0b	0.362245	-0.274348	0.609	0.591	1
Tra2a	0.362412	-0.305389	0.533	0.495	1
Dennd6a	0.36246	-0.284338	0.272	0.323	1
Rtn1	0.364337	-0.394724	0.217	0.247	1
Smagp	0.364629	-0.301315	0.12	0.161	1
Nbr1	0.365318	0.279213	0.261	0.204	1
Eif4e	0.365822	-0.457334	0.087	0.118	1
Tifa	0.365917	-0.481238	0.076	0.108	1
Tmem234	0.36702	-0.288631	0.152	0.194	1
Cacna1a	0.367121	0.272377	0.25	0.183	1
Snx25	0.368619	0.254227	0.25	0.194	1
Usp33	0.368943	-0.316952	0.163	0.204	1
Dcaf8	0.36958	-0.438652	0.261	0.28	1
Phka1	0.369712	-0.427357	0.163	0.194	1
Extl3	0.370037	0.499414	0.185	0.14	1
Gm10790	0.370129	0.31716	0.228	0.172	1
Kdm4c	0.370362	-0.279137	0.326	0.355	1
Mtmr3	0.370935	-0.280062	0.5	0.527	1
Arntl	0.372512	-0.290363	0.13	0.172	1
Tg	0.374698	-0.420358	0.076	0.108	1
Sh3pxd2b	0.376016	-0.351783	0.207	0.247	1
Mfsd14a	0.376575	0.328136	0.207	0.161	1
Ptprn2	0.377859	-0.312935	0.109	0.151	1
Acat1	0.379636	0.415437	0.174	0.129	1
Magi2	0.380428	-0.312637	0.457	0.495	1
Eya3	0.381084	0.31527	0.196	0.14	1
Thra	0.382715	-0.263825	0.152	0.194	1
Idh2	0.383095	-0.285271	0.174	0.215	1
Ppp1r12c	0.38519	-0.339983	0.196	0.226	1
Tubgcp2	0.386606	-0.420118	0.076	0.108	1
Stxbp5	0.386753	0.380739	0.359	0.301	1
Chm	0.387003	-0.350033	0.207	0.237	1
Rala	0.387274	-0.265029	0.152	0.194	1
Rfc1	0.3884	-0.415266	0.098	0.129	1
Slfn8	0.3884	-0.381895	0.098	0.129	1
Rnf19b	0.388592	-0.325435	0.141	0.183	1
Srgap2	0.390115	0.283306	0.772	0.806	1
Zmym4	0.390314	-0.299126	0.391	0.409	1
Bri3	0.39071	0.298842	0.152	0.108	1
Sun1	0.391215	-0.438621	0.087	0.118	1
D5Ertd579e	0.392105	0.262326	0.272	0.226	1
H3f3b	0.392446	0.294624	0.261	0.204	1
Trak1	0.392718	-0.356855	0.391	0.387	1
Slc25a3	0.393598	-0.289789	0.283	0.301	1
Ptprm	0.394134	-0.568529	0.13	0.172	1
Ttc14	0.395105	-0.299689	0.467	0.484	1
Ehmt2	0.395331	0.287136	0.196	0.151	1
Rnh1	0.395686	-0.402838	0.076	0.108	1
Mapk10	0.398078	-0.269775	0.141	0.183	1
Utp14a	0.398742	-0.545814	0.076	0.108	1
Slc49a4	0.401869	-0.566651	0.196	0.215	1
Fam114a2	0.402292	-0.351822	0.141	0.172	1
Thap2	0.404895	-0.369454	0.076	0.108	1
Zcrb1	0.404895	-0.308603	0.076	0.108	1
Soga1	0.405223	0.307418	0.174	0.129	1
Zkscan3	0.405872	-0.296949	0.239	0.269	1
Myl12b	0.406442	0.304749	0.109	0.075	1
Pcnx	0.406794	-0.333259	0.13	0.161	1
Sptbn1	0.40698	-0.387002	0.217	0.247	1
AW549877	0.410752	-0.351028	0.12	0.151	1
Hmgcs1	0.411686	-0.405255	0.087	0.118	1
Bfar	0.411686	-0.263827	0.087	0.118	1
Shtn1	0.412068	-0.656084	0.12	0.151	1
Camta1	0.412879	-0.262392	0.185	0.226	1
Cdk7	0.414022	-0.284196	0.109	0.14	1
Gnai3	0.414661	-0.348948	0.087	0.118	1
Znrf1	0.415548	-0.302744	0.196	0.237	1
Ubap2	0.416409	-0.355724	0.098	0.129	1
Arhgef18	0.416409	-0.349037	0.098	0.129	1
Tmem181a	0.416409	-0.292321	0.098	0.129	1
Ust	0.416609	-0.309476	0.304	0.344	1
Kansl3	0.416766	-0.328343	0.109	0.14	1
4933434E20Rik	0.41737	-0.286199	0.076	0.108	1
Tent5a	0.417593	-0.567376	0.163	0.194	1
Sucla2	0.417649	-0.328435	0.087	0.118	1
Lrrfip2	0.418729	-0.284039	0.174	0.215	1
Zc3h18	0.419558	-0.348196	0.13	0.161	1
Ifi207	0.419685	-0.418991	0.37	0.366	1
Cdc26	0.42065	-0.26598	0.087	0.118	1
Fnip2	0.42099	0.4055	0.413	0.376	1
Anks1b	0.422673	-0.346712	0.489	0.484	1
Map3k20	0.423692	-0.33038	0.076	0.108	1
Parp2	0.42669	-0.291996	0.087	0.118	1
Gbe1	0.426705	-0.360615	0.12	0.151	1
Scap	0.426874	-0.281839	0.076	0.108	1
Mtr	0.427325	-0.418641	0.38	0.387	1
Copa	0.430675	-0.420477	0.272	0.301	1
Thoc7	0.43085	-0.321178	0.098	0.129	1
Urm1	0.432779	-0.255051	0.087	0.118	1
Rsbn1l	0.432921	-0.418836	0.185	0.215	1
Tspan2	0.433279	-0.268185	0.076	0.108	1
Agrn	0.433279	-0.351784	0.076	0.108	1
Atp5f1	0.436707	-0.340202	0.098	0.129	1
Apba2	0.436707	-0.270106	0.098	0.129	1
Capns1	0.439097	-0.359314	0.109	0.14	1
Usp16	0.439853	-0.353492	0.141	0.172	1
Foxk1	0.441936	-0.29564	0.109	0.14	1
Dclk1	0.442929	-0.35951	0.272	0.29	1
Erc1	0.443117	-0.388646	0.13	0.161	1
Rhoj	0.445108	-0.346427	0.087	0.118	1
Dpp8	0.44533	-0.36749	0.348	0.355	1
Ncam2	0.445437	-0.425439	0.326	0.344	1
Ppp1cb	0.445903	-0.495625	0.174	0.194	1
Dhx9	0.447042	-0.30995	0.424	0.43	1
Atp6v0e	0.447892	0.272887	0.109	0.075	1
Stxbp6	0.448453	-0.39583	0.13	0.161	1
Strbp	0.451608	-0.271991	0.424	0.43	1
Ahcyl2	0.452733	0.268245	0.272	0.226	1
Dip2a	0.453396	-0.302223	0.109	0.14	1
Parp9	0.453596	-0.281374	0.174	0.204	1
Suz12	0.453825	-0.269441	0.13	0.161	1
Slmap	0.45391	-0.333659	0.326	0.333	1
Brd2	0.456059	0.26404	0.12	0.086	1
Blvra	0.456525	-0.36587	0.13	0.161	1
Srsf7	0.457233	-0.302394	0.37	0.376	1
Pigu	0.460586	-0.251627	0.098	0.129	1
1810013L24Rik	0.461074	-0.34933	0.12	0.151	1
Rab11fip2	0.462383	0.252233	0.12	0.086	1
Ubr4	0.462481	-0.360127	0.12	0.151	1
Tmem131l	0.463413	-0.39519	0.228	0.258	1
Nfia	0.467207	-0.255857	0.598	0.613	1
Slc31a1	0.468039	-0.413486	0.174	0.194	1
Msr1	0.46815	-0.368785	0.283	0.312	1
St7	0.46834	0.285458	0.217	0.172	1
Nfatc3	0.46834	0.293383	0.217	0.172	1
Cnrip1	0.470357	-0.308794	0.087	0.118	1
Sec62	0.470592	-0.307751	0.207	0.237	1
Kcnrg	0.470897	-0.302689	0.109	0.14	1
Immp1l	0.472911	-0.303036	0.13	0.161	1
Etv1	0.473902	-0.305806	0.435	0.441	1
Cwf19l2	0.473959	-0.365129	0.304	0.301	1
Kcnb2	0.475315	0.253934	0.174	0.14	1
Epb41l1	0.482769	-0.377025	0.109	0.14	1
Ctnnbl1	0.482769	-0.269199	0.109	0.14	1
Gatad2a	0.48309	0.265089	0.217	0.172	1
Lyve1	0.483464	-0.508169	0.228	0.247	1
Foxo1	0.48675	0.308153	0.152	0.118	1
Ube2e2	0.48942	-0.404272	0.196	0.226	1
Dennd4a	0.490604	0.312024	0.272	0.226	1
Dpy19l1	0.492747	-0.273893	0.152	0.183	1
Hnrnpl	0.494269	-0.478692	0.272	0.28	1
Cp	0.497373	-0.282683	0.391	0.398	1
Zfp266	0.500904	-0.313733	0.098	0.129	1
Cep128	0.502563	0.484312	0.174	0.14	1
Enpp2	0.504006	-0.253094	0.293	0.323	1
Trim41	0.506717	0.271545	0.261	0.215	1
Gm31243	0.507177	0.257425	0.228	0.183	1
Tbl1xr1	0.507436	0.250541	0.478	0.376	1
Atg7	0.510655	0.346515	0.228	0.204	1
Vps37a	0.511669	-0.294811	0.163	0.183	1
Peli2	0.514943	-0.361052	0.239	0.247	1
Acadsb	0.516449	-0.456612	0.087	0.108	1
Ms4a6c	0.519204	-0.257927	0.467	0.462	1
Tspan7	0.519346	0.291664	0.337	0.29	1
Hspa8	0.52043	-0.414979	0.25	0.258	1
Swt1	0.5217	-0.297952	0.185	0.215	1
Ap3d1	0.522978	-0.475885	0.196	0.204	1
Gm16083	0.525907	-0.613058	0.098	0.118	1
Ppfia1	0.52613	-0.395807	0.13	0.151	1
Sec63	0.529853	0.272122	0.228	0.183	1
Cep95	0.531418	-0.250291	0.185	0.204	1
Slc43a2	0.535172	-0.340819	0.5	0.484	1
Tfec	0.536389	-0.480197	0.152	0.172	1
Sh2b2	0.539289	0.335109	0.12	0.097	1
Ncbp1	0.540903	-0.381207	0.087	0.108	1
Simc1	0.540903	-0.398703	0.087	0.108	1
mt-Nd4	0.540903	-0.348851	0.087	0.108	1
Gna15	0.541174	0.250091	0.196	0.161	1
Rnpepl1	0.543087	-0.259995	0.109	0.129	1
Atp13a3	0.544354	0.351051	0.185	0.161	1
Egfem1	0.547757	0.279217	0.163	0.14	1
Slc38a9	0.547847	-0.270999	0.272	0.29	1
C87436	0.549585	-0.445073	0.109	0.129	1
Washc5	0.552849	-0.376202	0.109	0.129	1
Cbr2	0.553571	-0.256299	0.25	0.258	1
Ahctf1	0.555023	-0.266638	0.12	0.14	1
Nbeal1	0.555456	-0.458987	0.337	0.323	1
Fam126b	0.556209	-0.307049	0.13	0.151	1
Rfwd3	0.559373	-0.26451	0.12	0.086	1
Ate1	0.559677	-0.282414	0.098	0.118	1
Bclaf3	0.559677	-0.256197	0.098	0.118	1
Slc22a17	0.56087	-0.275959	0.196	0.215	1
Ufsp2	0.561346	-0.277436	0.12	0.14	1
Nampt	0.561346	-0.269547	0.12	0.14	1
Adgrl2	0.562206	-0.265526	0.283	0.301	1
BC052040	0.563111	-0.419971	0.098	0.118	1
Ms4a6d	0.564114	-0.324207	0.283	0.28	1
Myo1e	0.566409	-0.4257	0.12	0.086	1
Slc25a28	0.566555	-0.278731	0.098	0.118	1
Gm16599	0.566707	-0.319047	0.163	0.183	1
Edil3	0.569307	-0.373012	0.109	0.129	1
Sp100	0.569679	-0.482594	0.217	0.226	1
Ptprg	0.5714	-0.450805	0.196	0.215	1
Phyhipl	0.573172	-0.284401	0.087	0.108	1
Gramd3	0.57465	-0.291614	0.13	0.151	1
Ralgps2	0.57592	-0.262827	0.348	0.366	1
Nsmf	0.577304	-0.284102	0.12	0.14	1
Nid2	0.580481	-0.259891	0.141	0.161	1
Btk	0.582024	-0.323867	0.196	0.215	1
Plcb1	0.582682	-0.51701	0.326	0.312	1
Mta3	0.582994	-0.401739	0.239	0.247	1
Zbtb46	0.583755	-0.25913	0.163	0.183	1
Dock3	0.585186	-0.26249	0.163	0.183	1
Akap8	0.587426	-0.25503	0.228	0.247	1
Cnot6	0.587801	-0.306246	0.087	0.108	1
Gm30382	0.589561	-0.461721	0.141	0.161	1
Uhrf2	0.589847	-0.533199	0.272	0.269	1
Mpp6	0.590118	-0.361599	0.174	0.194	1
Npat	0.592732	-0.276743	0.109	0.129	1
Slc2a3	0.593472	-0.315023	0.12	0.14	1
Sugt1	0.594465	-0.264633	0.098	0.118	1
Ctsh	0.597136	-0.261755	0.261	0.28	1
N4bp2l2	0.598537	-0.573854	0.293	0.28	1
Fam120a	0.59941	-0.286232	0.261	0.269	1
Prkag1	0.602842	0.28636	0.152	0.129	1
Gm38134	0.602906	-0.257312	0.109	0.129	1
Rassf2	0.608538	-0.259013	0.359	0.366	1
Urgcp	0.609814	-0.30925	0.185	0.194	1
Kitl	0.610062	-0.329452	0.087	0.108	1
Grm5	0.612683	0.262505	0.272	0.237	1
Ifnar1	0.615613	-0.250316	0.174	0.194	1
Alpk1	0.616703	-0.412112	0.217	0.226	1
0610030E20Rik	0.61939	-0.276756	0.098	0.118	1
Nmnat3	0.621166	-0.285027	0.152	0.172	1
Arhgef12	0.633055	-0.283961	0.293	0.301	1
Csf2rb	0.637753	-0.262097	0.152	0.161	1
Bsg	0.639034	-0.473155	0.13	0.14	1
Rprd1a	0.639063	-0.256374	0.141	0.161	1
Nrg2	0.640275	-0.324209	0.272	0.28	1
Capza1	0.642172	-0.323779	0.391	0.366	1
Slc17a5	0.645273	-0.41722	0.272	0.28	1
Zfp64	0.64787	-0.293286	0.109	0.129	1
Arpc3	0.654893	-0.451931	0.152	0.161	1
Rnf213	0.656387	0.333192	0.326	0.29	1
Yeats2	0.656461	-0.282855	0.152	0.161	1
Klf3	0.660388	-0.333744	0.293	0.29	1
Traf3	0.665141	0.293636	0.228	0.204	1
N4bp1	0.66535	-0.3362	0.293	0.29	1
Iqsec2	0.666885	-0.292102	0.196	0.204	1
Chic2	0.668321	-0.278842	0.163	0.172	1
Itgb1	0.669185	0.289949	0.326	0.28	1
Myof	0.670956	-0.37459	0.141	0.151	1
Exoc3	0.672217	-0.279654	0.152	0.161	1
Rapgef4	0.672884	-0.371419	0.098	0.108	1
Rnf138	0.677187	-0.32019	0.109	0.118	1
Phax	0.67911	-0.287366	0.163	0.172	1
Clec4a1	0.686712	-0.410374	0.196	0.194	1
Ttc19	0.687014	-0.308736	0.196	0.204	1
Slc4a10	0.688164	-0.31183	0.109	0.118	1
Ergic1	0.688167	-0.347156	0.098	0.108	1
Fmn2	0.689354	-0.40253	0.13	0.14	1
Grik2	0.701454	-0.337697	0.304	0.301	1
C5ar1	0.7016	-0.317659	0.207	0.204	1
Rps27a	0.703578	-0.396364	0.098	0.108	1
Rpl37a	0.70558	-0.322439	0.163	0.172	1
Rpl5	0.70745	-0.274801	0.098	0.108	1
Ythdf2	0.709889	-0.263161	0.13	0.14	1
Pxk	0.710705	-0.279805	0.25	0.247	1
Ppwd1	0.713333	-0.31094	0.13	0.14	1
Ufl1	0.713436	-0.283466	0.163	0.172	1
Gabrg3	0.713848	-0.363416	0.152	0.161	1
Cntn4	0.715467	-0.27677	0.152	0.161	1
Pcbd2	0.717088	-0.274904	0.152	0.161	1
Nedd4	0.719093	-0.343069	0.196	0.204	1
Atxn2l	0.720738	-0.285774	0.228	0.226	1
Lamp1	0.721423	-0.290946	0.217	0.215	1
Zscan26	0.721599	-0.289966	0.261	0.258	1
Mir142hg	0.724413	-0.282867	0.315	0.301	1
Rnf41	0.72723	-0.25041	0.141	0.151	1
Epg5	0.728069	-0.324653	0.174	0.183	1
Mat2a	0.732298	-0.343589	0.261	0.258	1
Dram1	0.734535	-0.259841	0.109	0.086	1
Galnt13	0.738693	-0.459382	0.098	0.108	1
Ptpn4	0.740043	-0.342196	0.196	0.194	1
Abcc4	0.740231	-0.382332	0.109	0.118	1
Susd1	0.740414	-0.285812	0.283	0.269	1
Tcf25	0.745514	-0.411255	0.457	0.398	1
Gtf3c2	0.749671	-0.326301	0.228	0.237	1
4931406P16Rik	0.753149	-0.285988	0.163	0.161	1
Smc3	0.76577	-0.268259	0.174	0.172	1
Acbd5	0.77328	-0.367142	0.196	0.194	1
Ralb	0.796289	-0.271425	0.185	0.183	1
Tesk2	0.796864	-0.258929	0.217	0.215	1
Ednrb	0.813355	0.299289	0.315	0.333	1
Rmnd1	0.814576	-0.294366	0.217	0.215	1
Ogdh	0.815187	-0.293619	0.25	0.215	1
Ddx10	0.817123	-0.305775	0.174	0.172	1
Dync1h1	0.819667	-0.259434	0.25	0.247	1
Gspt1	0.824007	-0.306514	0.163	0.14	1
Bmpr2	0.824258	-0.333644	0.467	0.441	1
Tex2	0.825562	-0.418784	0.141	0.14	1
Herc4	0.825982	-0.261357	0.609	0.505	1
Tlr7	0.826278	-0.25663	0.348	0.333	1
Klc1	0.826573	-0.338912	0.228	0.215	1
Fgd2	0.829965	-0.271787	0.413	0.398	1
Gm26871	0.83422	-0.277492	0.141	0.118	1
Zfp951	0.83422	-0.315067	0.13	0.129	1
Hs2st1	0.834257	-0.279996	0.293	0.258	1
Map4k5	0.844633	-0.334575	0.152	0.151	1
Rbx1	0.848934	-0.307927	0.13	0.129	1
Cdc37l1	0.852509	-0.421474	0.38	0.333	1
Chd3	0.854925	-0.267049	0.196	0.183	1
Sept8	0.854987	-0.26163	0.152	0.151	1
Syt1	0.873234	-0.276938	0.38	0.344	1
Il18	0.875625	-0.370648	0.196	0.172	1
Rpap2	0.881566	-0.284547	0.12	0.118	1
Dmd	0.882139	-0.339538	0.217	0.204	1
Chordc1	0.897558	-0.28491	0.174	0.161	1
Dnajc5	0.902162	-0.306493	0.283	0.237	1
Spock3	0.904755	-0.305732	0.12	0.108	1
Mir100hg	0.918013	-0.537323	0.239	0.215	1
Tmod2	0.919022	-0.393431	0.141	0.129	1
Tmtc2	0.930664	-0.280386	0.13	0.129	1
Nmt2	0.932455	-0.261893	0.12	0.108	1
Ep300	0.932627	-0.250203	0.359	0.323	1
Tbcd	0.934397	-0.277927	0.174	0.161	1
Stat5b	0.935001	-0.250595	0.315	0.28	1
Ctr9	0.936419	-0.25693	0.12	0.108	1
Cept1	0.956254	-0.354665	0.467	0.387	1
Arih2	0.962772	-0.29307	0.272	0.237	1
Rps29	0.973056	-0.269142	0.207	0.183	1
Fgfr1op2	0.9744	-0.260726	0.163	0.161	1

## Sheet: Activated Microglia
gene	p_val	avg_log2FC	pct.1	pct.2	p_val_adj
Anapc15	1.67832e-19	2.19991	0.815	0.214	4.14932e-15
Cst3	7.32724e-17	-1.92927	0.552	0.829	1.81151e-12
Stab1	2.9385e-16	1.5672	0.891	0.386	7.26484e-12
Tmem119	3.71967e-16	-1.8829	0.03	0.314	9.19614e-12
Selplg	1.82213e-15	-2.0081	0.158	0.543	4.50486e-11
mt-Atp6	5.46607e-15	-1.79658	0.121	0.486	1.35138e-10
Abca1	9.1455e-15	1.46536	0.906	0.514	2.26104e-10
Mitf	1.80724e-14	1.72865	0.83	0.329	4.46804e-10
mt-Co3	4.68815e-14	-1.9355	0.13	0.486	1.15905e-09
Rftn1	4.8803e-14	1.85563	0.697	0.157	1.20656e-09
Fnip2	5.92363e-14	2.08014	0.77	0.314	1.4645e-09
Sparc	1.47156e-13	-1.79009	0.191	0.543	3.63814e-09
Lrmda	1.60501e-13	1.12038	0.973	0.757	3.96807e-09
Myo5a	3.36826e-13	1.44097	0.745	0.2	8.32736e-09
Nrp1	8.4269e-13	1.23221	0.855	0.3	2.08338e-08
Nav2	1.76822e-12	-1.65253	0.503	0.771	4.37157e-08
Igf1	2.47215e-12	2.21786	0.533	0.043	6.11191e-08
Selenop	3.16874e-12	1.64901	0.676	0.2	7.83408e-08
Gm35188	3.80458e-12	-1.52687	0.203	0.543	9.40605e-08
Slc9a9	6.91098e-12	0.93573	0.958	0.729	1.7086e-07
Ctsb	1.93707e-11	1.14676	0.888	0.457	4.78902e-07
Bcar3	3.25402e-11	2.17682	0.445	0.014	8.04492e-07
C1qa	5.86795e-11	-1.24942	0.418	0.686	1.45073e-06
Rcbtb2	8.17944e-11	1.45372	0.615	0.129	2.0222e-06
Apoe	8.31353e-11	1.28473	0.927	0.714	2.05535e-06
Man1c1	9.20841e-11	1.15575	0.836	0.414	2.2766e-06
Gas6	1.0506e-10	1.28278	0.639	0.143	2.59739e-06
Fnip1	1.78576e-10	1.32529	0.727	0.257	4.41493e-06
Chd9	2.38899e-10	-0.814233	0.885	0.957	5.90631e-06
Slc38a6	2.64993e-10	1.26666	0.694	0.2	6.55142e-06
Tanc2	3.32039e-10	-0.904284	0.864	0.914	8.209e-06
Snx24	4.62978e-10	1.14009	0.827	0.4	1.14462e-05
Plek	6.98112e-10	1.51288	0.6	0.143	1.72594e-05
Tgfbr1	8.86855e-10	-1.43621	0.6	0.757	2.19257e-05
Gpnmb	1.36122e-09	2.90931	0.379	0	3.36535e-05
Vps13c	1.64204e-09	1.36915	0.633	0.2	4.05962e-05
Ccnd3	2.46395e-09	-1.18313	0.524	0.757	6.09163e-05
Dmxl1	3.23713e-09	1.10139	0.706	0.243	8.00315e-05
Mrc1	5.10135e-09	0.409526	0.691	0.186	0.000126121
Numb	5.23296e-09	-0.904674	0.621	0.829	0.000129374
St6gal1	9.56476e-09	1.17805	0.706	0.3	0.000236469
Cacna1a	1.04515e-08	1.41257	0.633	0.243	0.000258393
Hpse	1.19361e-08	1.67428	0.345	0	0.000295097
Ppm1h	1.25725e-08	0.920036	0.891	0.6	0.00031083
Sgpl1	1.62067e-08	1.18705	0.476	0.071	0.000400679
Fmn1	2.45638e-08	1.56593	0.506	0.114	0.000607291
Osbpl8	2.53926e-08	1.4294	0.63	0.257	0.00062778
Gm46367	2.60899e-08	-1.41427	0.185	0.443	0.000645021
Csf1r	2.61066e-08	-1.00612	0.809	0.843	0.000645433
Sash1	2.68686e-08	1.23747	0.536	0.129	0.000664274
Cd84	3.41093e-08	1.1064	0.685	0.243	0.000843284
Ddx60	4.09441e-08	1.21831	0.461	0.086	0.00101226
Dgkz	4.60732e-08	1.30975	0.585	0.2	0.00113907
P2rx4	5.26889e-08	1.26634	0.515	0.129	0.00130263
Spp1	5.4061e-08	2.63436	0.321	0	0.00133655
Snx8	5.86463e-08	1.26074	0.448	0.071	0.00144991
Pnpla7	7.59655e-08	0.891577	0.852	0.486	0.00187809
Atp6v1a	7.79979e-08	1.29674	0.391	0.043	0.00192834
Gpr137b	7.89158e-08	1.27589	0.497	0.114	0.00195104
Kansl1l	9.0589e-08	1.07678	0.57	0.171	0.00223963
Tecpr1	9.10201e-08	1.38113	0.391	0.043	0.00225029
Fli1	9.24227e-08	0.78985	0.927	0.629	0.00228497
Zfhx3	1.17536e-07	-0.844763	0.894	0.943	0.00290584
Gramd1b	1.18832e-07	1.11721	0.503	0.114	0.00293788
Susd3	1.45261e-07	-1.13528	0.073	0.271	0.00359129
Itgb5	1.62668e-07	-0.967622	0.627	0.757	0.00402165
Arid5b	1.86363e-07	1.44336	0.506	0.143	0.00460744
Ralgapa2	1.97483e-07	1.32437	0.418	0.071	0.00488238
Abhd12	2.34808e-07	0.878197	0.873	0.557	0.00580517
Neat1	2.57385e-07	0.956039	0.536	0.143	0.00636332
Slco2b1	2.75435e-07	-1.0947	0.406	0.629	0.00680959
Abcd2	3.38072e-07	1.21184	0.476	0.114	0.00835816
Ccr5	3.70205e-07	-1.53243	0.121	0.343	0.00915259
Kif13b	3.79845e-07	1.07431	0.679	0.314	0.00939091
Erbin	4.38938e-07	0.842139	0.688	0.271	0.0108519
Nav3	5.09722e-07	-0.693062	0.582	0.814	0.0126019
Arhgap24	6.35604e-07	1.00295	0.558	0.2	0.015714
Akap10	9.35037e-07	0.78617	0.639	0.243	0.0231169
Plekhm2	1.01018e-06	1.00444	0.585	0.214	0.0249747
Kansl1	1.01269e-06	0.801525	0.818	0.529	0.0250367
Gm5086	1.06449e-06	1.1276	0.582	0.214	0.0263174
Lama3	1.12013e-06	1.92991	0.27	0	0.027693
Fgd4	1.2779e-06	0.970984	0.494	0.129	0.0315936
Cx3cr1	1.33675e-06	-0.772836	0.624	0.829	0.0330486
Reps2	1.42929e-06	1.30669	0.342	0.043	0.0353363
Ctsa	1.65226e-06	0.980103	0.548	0.171	0.0408489
Cacnb2	1.66631e-06	-1.40657	0.218	0.443	0.0411962
Slc8a1	1.74131e-06	0.662673	0.964	0.857	0.0430504
Abcg3	1.82901e-06	1.46253	0.288	0.014	0.0452187
Nceh1	1.96456e-06	0.907894	0.327	0.043	0.0485699
Apobec1	1.98956e-06	1.15389	0.552	0.229	0.0491878
Hexa	2.18234e-06	0.846222	0.506	0.157	0.053954
Siglech	2.85505e-06	-0.864474	0.436	0.657	0.0705854
Gm42477	2.98555e-06	-0.983108	0.079	0.257	0.0738117
Gng12	3.02307e-06	0.992279	0.542	0.2	0.0747394
Lilrb4a	3.09185e-06	1.38338	0.252	0	0.0764399
mt-Co2	3.24928e-06	-1.3613	0.106	0.3	0.080332
Gm26917	3.39389e-06	0.852112	0.818	0.5	0.0839072
Prkch	4.75195e-06	1.02142	0.442	0.129	0.117483
Fkbp5	5.61686e-06	-1.29862	0.221	0.414	0.138866
Ttyh2	6.18503e-06	1.19616	0.285	0.029	0.152913
Apbb1ip	6.42955e-06	-0.818549	0.724	0.814	0.158958
Tmem87b	6.84123e-06	0.956007	0.467	0.157	0.169136
mt-Nd3	8.15552e-06	-0.759765	0.009	0.1	0.201629
Wwox	8.46089e-06	0.998265	0.664	0.371	0.209179
Gapvd1	8.53592e-06	0.815208	0.642	0.271	0.211033
mt-Cytb	9.53148e-06	-1.18117	0.052	0.2	0.235647
Tspan9	9.67183e-06	1.26377	0.303	0.043	0.239117
Mertk	1.00686e-05	0.515555	0.961	0.8	0.248926
Igf1r	1.03207e-05	0.733671	0.655	0.3	0.255158
Arhgef40	1.09288e-05	-1.12924	0.079	0.243	0.270192
Cd9	1.11342e-05	1.13153	0.433	0.143	0.275271
Osbpl1a	1.19907e-05	0.945786	0.309	0.043	0.296446
Wwp1	1.27286e-05	0.887721	0.585	0.243	0.314689
Gab3	1.41328e-05	1.17534	0.348	0.071	0.349406
Frmd4a	1.50566e-05	-0.653062	0.87	0.857	0.372244
Tmeff2	1.5359e-05	-0.721091	0.615	0.743	0.379721
Gm13391	1.58375e-05	1.19846	0.221	0	0.39155
Nagk	1.66509e-05	0.770452	0.324	0.057	0.411661
Ivns1abp	1.69997e-05	-0.90839	0.506	0.629	0.420285
Sult1a1	1.7094e-05	-0.773905	0.015	0.114	0.422614
AC149090.1	2.01086e-05	0.614296	0.918	0.714	0.497144
Mog	2.01727e-05	-1.31955	0.145	0.329	0.49873
Fbxl20	2.03713e-05	0.860551	0.461	0.157	0.503639
Abr	2.45898e-05	0.868001	0.603	0.286	0.607935
Slc17a5	2.45992e-05	0.905966	0.385	0.1	0.608165
Rere	2.59718e-05	0.661821	0.77	0.457	0.642102
Slc23a2	2.74194e-05	0.990816	0.464	0.171	0.677889
Snx30	2.79079e-05	0.754457	0.548	0.2	0.689968
5033421B08Rik	3.08254e-05	1.16024	0.312	0.057	0.762096
mt-Co1	3.17974e-05	-1.14266	0.124	0.3	0.786127
Pvt1	3.19372e-05	1.07049	0.288	0.043	0.789583
Tnfrsf11a	3.35025e-05	0.775869	0.57	0.243	0.828283
Appl2	3.3956e-05	0.841042	0.482	0.171	0.839493
Rbm47	3.56952e-05	0.743752	0.715	0.371	0.882493
Mycbp2	3.84666e-05	-0.69667	0.742	0.771	0.95101
Pecam1	3.85186e-05	-0.73317	0.012	0.1	0.952296
Erbb4	3.91794e-05	-0.981899	0.57	0.657	0.968631
Pfkfb3	3.9933e-05	0.993786	0.358	0.086	0.987264
Cnrip1	4.0556e-05	1.08715	0.348	0.086	1
Atp6v0d1	4.08411e-05	0.942674	0.342	0.086	1
Arhgap25	4.35473e-05	0.708933	0.512	0.186	1
Dennd4c	4.41776e-05	0.896935	0.309	0.057	1
Wdr26	4.57984e-05	0.572561	0.658	0.314	1
Rgl1	4.58722e-05	0.911079	0.5	0.2	1
Gab2	4.60629e-05	0.589878	0.927	0.7	1
Dab2	4.71381e-05	0.508098	0.579	0.286	1
Pdpk1	4.88843e-05	0.901609	0.333	0.071	1
Slf2	4.97944e-05	0.787754	0.421	0.129	1
Nudt3	5.1942e-05	0.951445	0.248	0.029	1
Cfap74	5.22982e-05	-1.07221	0.1	0.257	1
Tacc1	5.36755e-05	-0.821101	0.476	0.629	1
Mbp	5.37366e-05	-0.779315	0.615	0.686	1
Zfp346	5.56833e-05	1.03977	0.197	0	1
Zmiz1	5.58371e-05	0.670874	0.682	0.329	1
Mthfs	5.65203e-05	0.797033	0.509	0.2	1
Ptpra	6.15176e-05	0.743257	0.709	0.414	1
Arhgap39	6.17658e-05	-0.790339	0.567	0.671	1
Apbb2	6.50124e-05	0.659811	0.618	0.271	1
Bri3	6.97251e-05	0.600024	0.382	0.1	1
Nfe2l2	7.03362e-05	0.788446	0.418	0.129	1
Mroh1	7.20136e-05	0.795896	0.433	0.143	1
Rragc	7.42101e-05	0.704944	0.33	0.071	1
Runx1	7.4322e-05	0.530199	0.858	0.6	1
Dkk2	7.57552e-05	1.55189	0.191	0	1
Pag1	7.64099e-05	-0.786014	0.573	0.657	1
Srgap2	8.07097e-05	-0.513484	0.924	0.943	1
Fam102b	8.53455e-05	-1.18009	0.148	0.314	1
Rab1a	8.80304e-05	0.807401	0.376	0.114	1
Pced1b	8.87556e-05	0.864057	0.245	0.029	1
Golga4	0.000100667	0.813731	0.427	0.157	1
C1qb	0.000102016	-0.929488	0.455	0.557	1
Fblim1	0.000102805	1.00827	0.185	0	1
Gas2l3	0.000102805	0.970711	0.185	0	1
Smyd3	0.000104271	0.636183	0.724	0.414	1
Rab11fip5	0.000104511	0.773392	0.27	0.043	1
Fam172a	0.000111291	0.694391	0.67	0.371	1
Plxna4	0.000113785	-1.01977	0.339	0.486	1
Tec	0.000122073	0.64278	0.539	0.229	1
Elf2	0.00012294	0.715655	0.567	0.257	1
Pum1	0.000124672	0.695075	0.421	0.143	1
Scaf11	0.000128107	0.808942	0.397	0.129	1
Serinc3	0.000129663	-0.714809	0.627	0.743	1
F13a1	0.000132628	-2.00383	0.027	0.129	1
Plin2	0.000132669	0.8607	0.288	0.057	1
Cadm1	0.000134062	0.886711	0.639	0.4	1
Cnot4	0.000134914	0.668375	0.545	0.243	1
Csf1	0.000135912	1.21896	0.23	0.029	1
Il10rb	0.000139186	0.827059	0.324	0.086	1
Ptbp3	0.000142983	0.646941	0.57	0.271	1
Ecscr	0.000151696	-0.784835	0.021	0.114	1
Stau2	0.000152193	0.918683	0.336	0.1	1
Dock4	0.000153961	-0.516373	0.918	0.886	1
Sntb2	0.000160102	0.836612	0.252	0.043	1
March7	0.000161088	0.803749	0.333	0.086	1
Galk2	0.000164608	0.730875	0.397	0.129	1
Aig1	0.000165819	0.978401	0.482	0.229	1
Rassf3	0.000169685	0.95087	0.276	0.057	1
Arhgap19	0.00017391	0.87922	0.255	0.043	1
Cdh23	0.000179634	-1.34719	0.233	0.4	1
Abcg1	0.000182073	0.971382	0.27	0.057	1
Myo1f	0.00019294	0.747403	0.739	0.471	1
Prkg1	0.00019348	0.925558	0.512	0.257	1
Sun2	0.000195312	-0.933988	0.061	0.186	1
Irf8	0.00019854	0.825511	0.527	0.243	1
Rtn3	0.000208338	0.654152	0.606	0.3	1
Lcp1	0.000220989	0.748765	0.448	0.171	1
Adam33	0.000227494	0.800387	0.276	0.057	1
Gnpda1	0.000227676	0.858375	0.252	0.043	1
Ctsz	0.000230775	0.737495	0.455	0.186	1
Rab40c	0.000236333	0.733576	0.409	0.143	1
mt-Nd2	0.000238281	-0.985119	0.036	0.143	1
Inpp4b	0.000242442	0.639664	0.809	0.486	1
Zfp106	0.000246804	0.812922	0.224	0.029	1
Elmo1	0.00024823	-0.510507	0.948	0.943	1
Atp6v0d2	0.000253245	1.47696	0.167	0	1
Gpr157	0.000253245	0.80237	0.167	0	1
Arhgap18	0.000256223	0.820613	0.306	0.086	1
Crebrf	0.0002592	0.636641	0.455	0.171	1
Apaf1	0.000259529	0.655593	0.3	0.071	1
Eya4	0.000263178	0.773023	0.382	0.129	1
Eepd1	0.000267444	0.828753	0.282	0.071	1
Asap1	0.000268272	0.551565	0.867	0.643	1
Kcnk12	0.000269639	-0.761077	0.036	0.143	1
Rap2a	0.000277761	0.78944	0.309	0.086	1
Mdfic	0.000281752	0.858918	0.221	0.029	1
Usp12	0.00028491	0.802465	0.348	0.114	1
Pcdh9	0.000289161	-0.505103	0.924	0.914	1
Man1a	0.000299414	-0.913374	0.439	0.557	1
Nrp2	0.000316535	0.569566	0.358	0.114	1
Olfml3	0.000322183	-0.804897	0.091	0.229	1
Ctss	0.000332412	-0.656591	0.503	0.6	1
C1qc	0.000340506	-0.795478	0.491	0.6	1
Sdcbp	0.000343292	0.633237	0.364	0.114	1
Blnk	0.000343654	0.522409	0.642	0.343	1
Gm26714	0.000347314	0.685627	0.218	0.029	1
Coro7	0.000357175	0.44398	0.315	0.086	1
Atxn7l1	0.000361675	0.659144	0.612	0.329	1
Gng10	0.000367349	-0.775197	0.018	0.1	1
Cntrl	0.000367731	0.764481	0.336	0.1	1
Fyb	0.000368076	0.540103	0.885	0.7	1
Ms4a6c	0.000391211	0.832982	0.236	0.043	1
Btbd17	0.00039226	-0.681182	0.024	0.114	1
Samd4	0.000402186	1.04897	0.342	0.129	1
Fbxw4	0.000437422	0.69535	0.412	0.171	1
Syngr1	0.000437508	0.587647	0.442	0.171	1
Glul	0.000445561	-0.952902	0.182	0.329	1
Pld3	0.000445744	0.778236	0.23	0.043	1
Pcdh10	0.000446606	-0.824923	0.039	0.143	1
Ppfibp2	0.00048161	0.740863	0.233	0.043	1
Manba	0.000493058	0.598596	0.315	0.086	1
Pcmtd1	0.000493278	0.590348	0.409	0.157	1
Snx27	0.000497719	0.773021	0.209	0.029	1
Usp25	0.000507934	0.729246	0.324	0.1	1
Dtnbp1	0.000513057	0.705461	0.421	0.157	1
Iqsec2	0.000513839	0.8499	0.209	0.029	1
Col4a3bp	0.000515116	0.662855	0.376	0.129	1
Arhgap5	0.000516616	-0.793566	0.376	0.514	1
Snrnp70	0.000521279	-0.536463	0.773	0.729	1
Lpcat2	0.000529013	-0.872089	0.336	0.471	1
Ccdc107	0.000567437	-0.721407	0.073	0.2	1
Galc	0.00058288	0.733235	0.233	0.043	1
Xist	0.000586861	0.642408	0.697	0.543	1
Itgam	0.000587549	-0.843575	0.339	0.471	1
Stox2	0.000589996	1.04368	0.37	0.143	1
Synj1	0.000592652	0.636498	0.37	0.129	1
Cdkal1	0.00059442	0.556728	0.509	0.229	1
Lyst	0.000595983	0.744718	0.515	0.257	1
Fndc3b	0.000608821	0.515574	0.539	0.243	1
Vps54	0.000611061	0.703849	0.424	0.171	1
Mfsd11	0.000615151	0.709871	0.339	0.114	1
Wipf1	0.000616809	0.708627	0.558	0.271	1
Usp48	0.000617122	0.648839	0.391	0.143	1
Lonrf3	0.00062449	0.810607	0.203	0.029	1
Arap2	0.000626428	0.678851	0.233	0.043	1
Aplp2	0.000639793	0.663853	0.406	0.157	1
Kpna4	0.0006523	0.642932	0.464	0.214	1
Dock10	0.00065599	-0.585439	0.73	0.8	1
Dapk1	0.000661891	0.835842	0.227	0.043	1
Ms4a7	0.000679387	0.599309	0.252	0.057	1
Vps35l	0.000686056	0.58456	0.4	0.143	1
Vps13d	0.000694436	0.612069	0.503	0.214	1
Akap9	0.000695829	0.659999	0.352	0.129	1
E230016M11Rik	0.000706562	0.825293	0.145	0	1
Galns	0.000706562	0.794382	0.145	0	1
Oxct1	0.000745408	0.641909	0.588	0.314	1
Zfand6	0.000755126	0.476471	0.473	0.186	1
Atf7	0.000755666	0.681644	0.473	0.214	1
Copa	0.000759455	0.505347	0.333	0.1	1
Bcl2a1b	0.000761366	0.768418	0.2	0.029	1
Cd63	0.000780002	0.725859	0.267	0.071	1
Ank3	0.000781737	-0.799299	0.445	0.557	1
B4galt1	0.000784357	0.514074	0.545	0.257	1
Fam13b	0.000788024	0.529203	0.442	0.186	1
Rin2	0.000800082	0.607333	0.545	0.271	1
Frrs1	0.000805193	0.638674	0.403	0.157	1
Ide	0.000816381	0.779794	0.142	0	1
Meg3	0.000828132	-0.490469	0.912	0.943	1
Ldlrad4	0.000831414	-0.479006	0.909	0.871	1
Rttn	0.000831435	0.796689	0.267	0.071	1
Hpcal1	0.000843746	0.771565	0.197	0.029	1
Pmepa1	0.000860491	-0.80958	0.315	0.457	1
St3gal6	0.00087057	-1.03657	0.306	0.443	1
Ankrd12	0.000878979	0.448589	0.552	0.257	1
Snx5	0.000901474	0.517559	0.591	0.3	1
Plekhm1	0.00090917	0.561221	0.276	0.071	1
Ncoa3	0.000918147	0.519002	0.552	0.257	1
Renbp	0.000939437	0.704053	0.297	0.086	1
3110082I17Rik	0.000962301	0.571509	0.358	0.129	1
Scly	0.000987979	0.710425	0.221	0.043	1
Flcn	0.00102521	0.629379	0.348	0.129	1
Lmo2	0.00103071	0.656964	0.388	0.157	1
Ralgps1	0.00103257	-0.827604	0.236	0.371	1
Cmtm8	0.00106314	-0.785305	0.036	0.129	1
Wdr91	0.00106989	0.610444	0.167	0.014	1
Slc2a7	0.00107162	-0.621948	0.021	0.1	1
Nexn	0.00108826	0.797537	0.136	0	1
Gns	0.00111324	0.460963	0.658	0.343	1
Atp6v1c1	0.00111373	0.497283	0.297	0.086	1
Lypd6	0.00113796	0.81013	0.164	0.014	1
Cd300a	0.00113929	0.552101	0.333	0.114	1
Trf	0.00114323	-0.925486	0.194	0.329	1
Lonp2	0.00116072	0.678967	0.303	0.1	1
Hif1a	0.00116237	0.667955	0.312	0.1	1
P2ry12	0.00116334	-0.635858	0.591	0.7	1
Adgrg1	0.00118751	-0.751299	0.055	0.157	1
Ptprk	0.00121772	-1.02046	0.109	0.243	1
Opa1	0.00126478	0.526627	0.27	0.071	1
Lyz2	0.00132851	0.813285	0.161	0.014	1
Slc26a11	0.00133065	0.753137	0.188	0.029	1
Mlxipl	0.00133421	-0.760725	0.194	0.329	1
Cd48	0.00136437	0.710542	0.161	0.014	1
St3gal2	0.00136771	-0.971522	0.064	0.171	1
Tor1aip1	0.00141134	0.481164	0.342	0.129	1
Nol4l	0.00142472	0.730463	0.3	0.1	1
Ttc3	0.00152993	0.349473	0.527	0.243	1
2900089D17Rik	0.00154467	0.681003	0.27	0.086	1
Myo9a	0.00155691	0.453757	0.697	0.386	1
Gga2	0.0015794	0.712919	0.179	0.029	1
Tnks2	0.00159868	0.632303	0.442	0.214	1
Dse	0.00161224	0.688258	0.3	0.1	1
Tjp1	0.00161431	-0.995704	0.27	0.4	1
Wdr11	0.00161485	0.662197	0.185	0.029	1
Tom1	0.00163111	0.677753	0.285	0.086	1
Hpgds	0.00164079	0.488717	0.891	0.714	1
Arhgap10	0.00164522	0.591109	0.158	0.014	1
Gyg	0.00166895	0.719832	0.127	0	1
A830008E24Rik	0.00170721	-1.07668	0.13	0.257	1
Npl	0.00175281	0.681012	0.403	0.171	1
Tmem65	0.00175476	0.610805	0.248	0.071	1
Soat1	0.00176372	0.503004	0.412	0.171	1
Osbpl9	0.00176875	0.430392	0.615	0.343	1
Cd81	0.00179761	-0.875762	0.194	0.329	1
Atp6v1h	0.00185126	0.682569	0.336	0.129	1
Snx10	0.00185803	0.511	0.258	0.071	1
Map3k1	0.00187068	0.536582	0.403	0.171	1
Extl3	0.00187243	-0.89863	0.212	0.343	1
E230029C05Rik	0.00191198	-0.796197	0.252	0.4	1
Prmt7	0.00192288	0.697403	0.124	0	1
Rbpj	0.0019388	-0.804746	0.512	0.243	1
Msl1	0.00198653	-0.723375	0.085	0.2	1
Rreb1	0.00199787	0.322934	0.945	0.771	1
Xrcc4	0.00200195	0.618725	0.336	0.129	1
Wdr7	0.00201823	0.561943	0.467	0.214	1
Plcl1	0.00202984	-0.591979	0.679	0.743	1
Wdpcp	0.00205735	0.561065	0.23	0.057	1
Erp29	0.00205802	0.512045	0.361	0.143	1
Ctsl	0.00206095	0.749584	0.433	0.2	1
Rab20	0.00207433	-0.525369	0.024	0.1	1
Cdk8	0.00208034	0.443948	0.609	0.329	1
Gm15283	0.00210619	0.658382	0.152	0.014	1
Zrsr2	0.00215513	0.623003	0.23	0.057	1
Cdk17	0.00216178	0.481313	0.403	0.171	1
Zbtb18	0.00221449	0.665881	0.121	0	1
Tlr1	0.00221449	0.640594	0.121	0	1
Zbtb11	0.00226212	0.687581	0.176	0.029	1
Pten	0.00226645	-0.764103	0.37	0.471	1
Parp9	0.00229904	0.647171	0.224	0.057	1
Xrn1	0.00230555	0.585871	0.412	0.186	1
Skap2	0.00232193	0.461322	0.682	0.414	1
Nhlrc3	0.00233216	0.679082	0.176	0.029	1
Dcaf10	0.00236467	0.679848	0.173	0.029	1
Tbc1d23	0.00238808	0.599402	0.373	0.157	1
Nrg1	0.00243432	0.488814	0.4	0.157	1
Zfp395	0.0024707	0.725452	0.17	0.029	1
Rab2a	0.00247395	0.525478	0.394	0.171	1
Snx20	0.00248536	0.620877	0.148	0.014	1
Sox6	0.00248784	0.659658	0.2	0.043	1
Wdfy3	0.002499	0.440457	0.845	0.543	1
Wnk1	0.00250165	-0.572061	0.715	0.729	1
Tmem268	0.00250169	0.627149	0.148	0.014	1
Gpr146	0.00254926	0.652528	0.118	0	1
2810004N23Rik	0.00254926	0.662009	0.118	0	1
Ifngr2	0.00255637	0.575149	0.294	0.1	1
Trafd1	0.00256481	0.48705	0.273	0.086	1
Entpd1	0.0025672	0.511768	0.755	0.471	1
Samd8	0.00259833	0.616181	0.197	0.043	1
Dst	0.00261788	-0.553319	0.742	0.757	1
Atg7	0.00262308	0.709358	0.3	0.114	1
2510009E07Rik	0.0026675	0.704887	0.239	0.071	1
Maf	0.00267045	0.412357	0.739	0.486	1
Colgalt1	0.00272334	0.558314	0.273	0.086	1
Slc7a7	0.00272403	0.477078	0.47	0.229	1
Arsg	0.00274408	0.653196	0.194	0.043	1
Cyba	0.00276194	0.653368	0.264	0.086	1
Inpp4a	0.00278071	0.575673	0.33	0.129	1
Fcgr2b	0.00278957	0.576273	0.294	0.1	1
Soga1	0.00280171	-0.891412	0.327	0.443	1
Uvrag	0.00280346	0.367383	0.7	0.429	1
Dock1	0.00280393	0.473526	0.63	0.343	1
Fyco1	0.00281992	0.677034	0.261	0.086	1
Rnf2	0.00285884	0.503025	0.33	0.129	1
Vps26a	0.00286222	0.514072	0.218	0.057	1
Mapkapk3	0.00287396	0.581956	0.145	0.014	1
Fars2	0.00290349	0.411448	0.442	0.214	1
Dock6	0.00290466	0.778277	0.23	0.071	1
Dglucy	0.00290571	0.644335	0.194	0.043	1
Nsf	0.00290882	0.55045	0.382	0.157	1
Alg14	0.00293345	0.637288	0.115	0	1
Scfd2	0.00294629	0.631712	0.221	0.057	1
Aph1c	0.00296691	0.633086	0.17	0.029	1
Cpq	0.00301433	0.536551	0.364	0.157	1
Col27a1	0.00303859	-0.735481	0.194	0.314	1
Pde3b	0.00311027	-0.653113	0.712	0.757	1
Commd10	0.00311529	0.69135	0.233	0.071	1
Clcn7	0.0031438	0.629649	0.258	0.086	1
3830406C13Rik	0.00315289	0.641614	0.142	0.014	1
Dnajb14	0.00315514	0.4703	0.333	0.129	1
Tm9sf4	0.00315944	0.506711	0.221	0.057	1
Elk3	0.00317017	0.393344	0.482	0.229	1
Mthfr	0.00318968	0.606252	0.17	0.029	1
Creb5	0.00325803	-0.660304	0.061	0.157	1
Prune2	0.00326817	0.650115	0.239	0.071	1
Prdm15	0.0033742	0.586982	0.112	0	1
Itgax	0.00337421	0.694508	0.112	0	1
Dna2	0.00337421	0.564788	0.112	0	1
Mamdc2	0.00337421	0.996735	0.112	0	1
Atxn1	0.00338144	0.564625	0.791	0.529	1
Slc46a3	0.00340855	0.565128	0.267	0.086	1
Fbxw7	0.00341012	0.521896	0.342	0.143	1
Eng	0.00341993	-0.809592	0.052	0.143	1
Grina	0.00343709	0.489136	0.442	0.2	1
Tbc1d4	0.00347773	0.460862	0.452	0.214	1
Cyth3	0.00349179	0.465513	0.258	0.086	1
Itpkb	0.00349879	0.325811	0.427	0.186	1
Rasa1	0.00352892	0.637877	0.442	0.214	1
Tnfrsf21	0.00355502	0.604907	0.285	0.1	1
Stim1	0.00356657	0.471326	0.261	0.086	1
Rps6ka1	0.00361267	-0.875101	0.255	0.371	1
Btaf1	0.00361487	0.576168	0.421	0.2	1
Tpd52	0.0036227	0.553478	0.379	0.171	1
Map2k4	0.00362884	0.617737	0.23	0.071	1
Cd68	0.00363777	0.568611	0.261	0.086	1
Pld2	0.00364285	0.613459	0.139	0.014	1
Atp1b3	0.00373194	0.552044	0.318	0.129	1
1700025G04Rik	0.00374114	0.738028	0.136	0.014	1
Aldh2	0.0037882	0.63887	0.133	0.014	1
Fgd2	0.00380168	-0.720947	0.558	0.586	1
Adgb	0.00381341	0.678815	0.164	0.029	1
Tgfbr2	0.00381774	0.517796	0.612	0.371	1
Eea1	0.00382719	0.502488	0.282	0.1	1
Klc1	0.0038291	0.506143	0.306	0.114	1
Vac14	0.0038528	0.435097	0.233	0.071	1
Arap1	0.00385469	0.588766	0.212	0.057	1
Hebp1	0.00387973	0.645807	0.109	0	1
Axl	0.00387973	0.587561	0.109	0	1
Paox	0.00387973	0.577565	0.109	0	1
Cand1	0.00387973	0.613766	0.109	0	1
Sec22a	0.00387973	0.616571	0.109	0	1
Ccs	0.00387973	0.582254	0.109	0	1
8030442B05Rik	0.00390855	-0.779252	0.312	0.443	1
Csnk1g1	0.0039441	0.630815	0.361	0.157	1
Rsrc1	0.00400699	0.591406	0.445	0.229	1
Itga4	0.00402696	0.687587	0.206	0.057	1
Klhl24	0.00402947	0.564952	0.276	0.1	1
Slc2a9	0.00405644	0.653705	0.161	0.029	1
Slc6a6	0.00406326	0.40805	0.491	0.229	1
Picalm	0.00407682	-0.418751	0.688	0.714	1
Supt6	0.00417144	0.565582	0.164	0.029	1
Gas5	0.00417622	-0.687336	0.224	0.343	1
Mgmt	0.00418541	0.649594	0.291	0.114	1
Iars2	0.00420434	0.624082	0.185	0.043	1
Rab12	0.00425241	0.630694	0.182	0.043	1
Il15	0.00428411	0.449598	0.324	0.129	1
Itga9	0.00430271	-0.69432	0.309	0.414	1
Pkig	0.00432257	-0.816577	0.312	0.414	1
Ctsd	0.00433441	0.418439	0.867	0.671	1
Nek6	0.00434837	0.484431	0.336	0.143	1
Olfr56	0.00434873	0.566064	0.164	0.029	1
Nkain2	0.00441984	-0.526999	0.742	0.743	1
Manbal	0.00445939	0.560321	0.106	0	1
Pparg	0.00445939	0.657353	0.106	0	1
Phtf2	0.00461814	0.542683	0.188	0.043	1
Gm32591	0.00465464	0.64876	0.161	0.029	1
Gna12	0.00467107	0.512953	0.594	0.329	1
Arrdc1	0.00469198	0.615824	0.158	0.029	1
Rab22a	0.00469552	0.517477	0.188	0.043	1
Canx	0.00481529	0.392174	0.379	0.171	1
Mfsd1	0.00484082	0.633598	0.179	0.043	1
Cd180	0.00490958	0.612513	0.467	0.243	1
Ranbp9	0.00496275	0.472485	0.382	0.171	1
Camsap2	0.00496392	0.547537	0.209	0.057	1
Adipor1	0.00510325	0.560655	0.276	0.1	1
Rbbp8	0.00512388	0.560823	0.103	0	1
Card11	0.00512389	0.591568	0.103	0	1
Ogfod1	0.00512389	0.591687	0.103	0	1
Arfgef2	0.0051261	0.647502	0.345	0.157	1
Khdc4	0.00527854	0.452901	0.282	0.1	1
Tmcc3	0.00528666	0.332072	0.927	0.743	1
Osbpl2	0.00529585	0.582997	0.155	0.029	1
Crtc3	0.00539393	0.501176	0.279	0.1	1
Kcnma1	0.00539547	-0.845069	0.282	0.386	1
Cr1l	0.00539994	0.513104	0.185	0.043	1
Lrp12	0.00541141	0.514043	0.23	0.071	1
Baz2b	0.00541187	0.376493	0.667	0.371	1
Magi1	0.00554505	0.561651	0.688	0.471	1
Phc3	0.0056316	0.487771	0.339	0.143	1
Eif4ebp2	0.00564462	0.555961	0.179	0.043	1
Mphosph9	0.005673	-0.754651	0.076	0.171	1
Wtap	0.00567604	0.385557	0.203	0.057	1
Gm13710	0.00568395	0.5559	0.473	0.243	1
Ip6k1	0.00576645	0.3581	0.433	0.229	1
Cab39	0.0057749	0.480788	0.324	0.143	1
Fgf13	0.00578466	0.738752	0.588	0.386	1
Slc30a9	0.00578703	0.450517	0.342	0.143	1
Specc1	0.0058355	0.487006	0.682	0.443	1
Gm4876	0.00588551	0.636808	0.1	0	1
Cd22	0.00588551	0.578593	0.1	0	1
Zfp36l1	0.00588832	0.52432	0.409	0.2	1
Chd3	0.00595422	0.520351	0.312	0.129	1
Rabgap1	0.00595485	0.358563	0.455	0.214	1
Smarca4	0.00598533	0.57322	0.248	0.086	1
Adcy7	0.00600739	0.460873	0.409	0.2	1
Ms4a4a	0.00605457	0.42398	0.182	0.043	1
Nup88	0.00605816	0.589436	0.124	0.014	1
Maml3	0.00606636	-0.46278	0.782	0.8	1
Prkce	0.00613532	-0.696327	0.209	0.329	1
Olfr111	0.00614072	0.571956	0.155	0.029	1
Snhg14	0.00615309	-0.917919	0.264	0.357	1
Map3k20	0.00618997	0.563899	0.176	0.043	1
Ppp1r12b	0.00620224	0.55719	0.336	0.143	1
Lrp5	0.00624061	0.522521	0.397	0.186	1
Ppp3cb	0.00624558	0.47472	0.288	0.114	1
H3f3a	0.00627829	0.403934	0.248	0.086	1
Vti1a	0.00632203	0.502857	0.624	0.371	1
Rassf4	0.00636549	0.323954	0.203	0.057	1
Srsf9	0.00637481	-0.769496	0.067	0.157	1
Csmd3	0.00639287	-1.2407	0.382	0.457	1
March6	0.00645771	0.485563	0.221	0.071	1
Cblb	0.00649096	0.517694	0.248	0.086	1
Amdhd2	0.00651135	0.493836	0.155	0.029	1
Dhrs3	0.00664384	0.495676	0.403	0.2	1
Epb41	0.00667204	0.580406	0.439	0.229	1
Fggy	0.00669722	0.536559	0.224	0.071	1
Snd1	0.00671932	0.566949	0.518	0.286	1
Ago4	0.00672426	0.573518	0.152	0.029	1
Mapk1	0.00673152	0.320092	0.339	0.143	1
Tsix	0.00674046	0.338335	0.594	0.386	1
Vps33a	0.00688473	0.447613	0.252	0.086	1
B4galt6	0.00691816	-0.706245	0.121	0.229	1
Prickle1	0.00691857	0.689723	0.236	0.086	1
Lipa	0.00693455	0.446546	0.179	0.043	1
Gm12353	0.0070116	0.524045	0.261	0.1	1
Esr1	0.00703012	0.63418	0.124	0.014	1
Dennd1a	0.00704904	0.446423	0.682	0.443	1
Eri3	0.00704905	0.643734	0.418	0.214	1
Cog4	0.00707336	0.40165	0.258	0.1	1
Gm34280	0.00707861	-0.488352	0.03	0.1	1
Npepps	0.00709669	0.466796	0.476	0.243	1
Zdhhc14	0.00712002	0.440935	0.797	0.557	1
Cpeb3	0.00714083	0.429912	0.267	0.1	1
Zcchc8	0.00717354	0.528061	0.267	0.1	1
Pex14	0.00717776	0.546382	0.279	0.114	1
Otub1	0.007183	-0.574286	0.03	0.1	1
Nemf	0.00720516	0.546291	0.288	0.114	1
Lrrc39	0.00721277	0.589584	0.124	0.014	1
Abl2	0.00721314	0.568629	0.494	0.286	1
Esyt2	0.00723819	0.532391	0.2	0.057	1
Ago3	0.00723972	0.433884	0.527	0.286	1
Scaper	0.00724858	0.494679	0.391	0.186	1
Mettl25	0.00725557	0.469132	0.152	0.029	1
Rad51b	0.00725665	0.670338	0.33	0.157	1
Emc8	0.00730569	0.555452	0.124	0.014	1
Ulk4	0.00730569	0.542665	0.124	0.014	1
Tle4	0.00733444	0.495144	0.406	0.186	1
Snn	0.00738583	-0.627336	0.048	0.129	1
P4hb	0.0074783	-0.593665	0.058	0.143	1
Blvra	0.00754269	0.332189	0.124	0.014	1
Mosmo	0.00759818	0.565931	0.121	0.014	1
Iqgap2	0.00760857	0.303889	0.224	0.071	1
Ppp4r3a	0.00764015	0.606352	0.282	0.114	1
Nsmce2	0.00764961	0.482385	0.539	0.314	1
Mtm1	0.00774624	0.538212	0.121	0.014	1
Qrich1	0.00776835	0.338368	0.355	0.157	1
Tgs1	0.00778969	-0.799733	0.176	0.286	1
Lrp6	0.00780911	0.554066	0.473	0.257	1
Cyth4	0.00781342	-0.582918	0.6	0.614	1
Hps5	0.00781387	0.564693	0.17	0.043	1
Ptgds	0.00786499	-1.01918	0.091	0.186	1
Stx6	0.0079698	0.54758	0.194	0.057	1
Map2k5	0.00798413	0.359449	0.452	0.229	1
Srsf7	0.0079891	-0.71851	0.264	0.357	1
Atp5j2	0.00812309	-0.648313	0.058	0.143	1
B2m	0.00813786	0.657983	0.206	0.071	1
Mal	0.00814506	-0.834365	0.039	0.114	1
Atp6v1b2	0.00818213	0.566734	0.4	0.2	1
Dpp10	0.00821151	0.318932	0.461	0.229	1
Ly6h	0.00822596	-0.830801	0.07	0.157	1
Sqstm1	0.00823057	0.408995	0.218	0.071	1
Stx12	0.00834722	0.472693	0.194	0.057	1
Cdc42	0.00835987	0.397263	0.491	0.257	1
4931422A03Rik	0.00838849	0.512352	0.17	0.043	1
Dgkd	0.0086251	0.366857	0.585	0.329	1
Ccdc82	0.00864129	0.56823	0.145	0.029	1
Phyhd1	0.0087933	-0.52142	0.564	0.6	1
Sipa1	0.00882645	-0.697799	0.252	0.343	1
Pikfyve	0.00886085	0.329637	0.291	0.114	1
Micu2	0.00886931	0.578021	0.191	0.057	1
Marf1	0.00888502	0.305871	0.394	0.186	1
Pibf1	0.00889899	0.415157	0.433	0.229	1
Akap7	0.00892063	0.55561	0.194	0.057	1
Shprh	0.00892344	0.328973	0.221	0.071	1
Gm42047	0.00897081	0.669247	0.142	0.029	1
Tlr7	0.00898769	0.364164	0.376	0.171	1
Sergef	0.0090521	0.618912	0.145	0.029	1
Nrip1	0.00908827	-0.468229	0.439	0.514	1
Irak4	0.00915749	0.564171	0.145	0.029	1
Spg11	0.00916781	0.497469	0.233	0.086	1
Ddhd1	0.00926269	0.512774	0.358	0.171	1
Gtf2h1	0.009263	0.540879	0.167	0.043	1
Ccdc57	0.00927359	0.596816	0.118	0.014	1
Atp6v0a1	0.0092906	0.502578	0.7	0.5	1
Arhgef18	0.00930842	0.625955	0.139	0.029	1
Kif5b	0.00934646	0.48393	0.327	0.143	1
Ms4a6d	0.00942576	0.485508	0.145	0.029	1
Rnf13	0.00943257	0.438356	0.421	0.214	1
Hmg20a	0.00944155	0.29581	0.315	0.129	1
Lhfpl2	0.00947887	0.485794	0.515	0.3	1
Psma1	0.00953503	0.473946	0.145	0.029	1
Cdk13	0.009538	0.48612	0.455	0.243	1
Slc37a2	0.00960638	0.484542	0.279	0.114	1
Stard9	0.0096328	0.373412	0.621	0.371	1
Arnt	0.00965389	0.276074	0.288	0.114	1
Tenm3	0.00967449	0.543931	0.194	0.057	1
Rtf1	0.00971574	0.557723	0.188	0.057	1
Glud1	0.00972344	0.427417	0.194	0.057	1
Tmc7	0.00972889	-0.713687	0.079	0.171	1
Dnajb6	0.00974585	0.459193	0.367	0.171	1
Cdip1	0.00982234	0.553968	0.312	0.143	1
Zfp407	0.00986704	0.416703	0.467	0.257	1
Cog5	0.00990508	0.362942	0.473	0.257	1
Txndc16	0.00995703	0.310909	0.267	0.1	1
Zmym6	0.00999015	0.501349	0.167	0.043	1
Vav2	0.0100014	0.52225	0.442	0.243	1
Ttc7	0.0101111	0.410625	0.233	0.086	1
Eif4e2	0.0102133	0.565753	0.115	0.014	1
Dars	0.0102294	0.475548	0.209	0.071	1
Tmem106a	0.0102766	0.435302	0.194	0.057	1
Plxnc1	0.0103481	0.57646	0.233	0.086	1
Chchd3	0.0103671	0.389207	0.342	0.157	1
Cfh	0.0104055	-0.743374	0.455	0.514	1
Pld1	0.0105618	-0.593633	0.391	0.457	1
Znfx1	0.0106251	0.3382	0.218	0.071	1
Tnpo1	0.0106289	0.446993	0.397	0.2	1
Phkb	0.0106877	0.427696	0.4	0.2	1
Dpp8	0.0107286	0.409844	0.379	0.171	1
Nadk2	0.0107467	0.534127	0.115	0.014	1
Slc25a13	0.010815	0.523904	0.115	0.014	1
Trappc8	0.0108219	0.440666	0.439	0.214	1
Cyp4v3	0.0108838	0.502153	0.115	0.014	1
Suz12	0.0109693	0.586356	0.245	0.1	1
Tssc4	0.0109765	-0.615963	0.061	0.143	1
Coq8b	0.0109838	0.363221	0.142	0.029	1
Smad7	0.0109899	-0.860974	0.158	0.257	1
Rbfox2	0.0110082	-0.782708	0.155	0.257	1
Chek2	0.0110225	0.482753	0.115	0.014	1
Polr3a	0.0110225	0.489231	0.115	0.014	1
Dhx15	0.0111234	0.47138	0.273	0.114	1
Abcb4	0.0111431	-0.542914	0.033	0.1	1
Tsc22d1	0.0111575	0.470759	0.209	0.071	1
Npm1	0.0112358	0.477718	0.167	0.043	1
Csnk1d	0.01124	0.545855	0.182	0.057	1
Ice2	0.0113046	0.323944	0.115	0.014	1
Cerk	0.0113352	0.425861	0.676	0.443	1
Aste1	0.0113466	-0.583873	0.033	0.1	1
Arhgef11	0.0113823	0.368523	0.455	0.229	1
Mbtps2	0.0114128	0.567469	0.182	0.057	1
Pi4ka	0.0114713	0.402445	0.373	0.171	1
Gm40645	0.0116335	0.433771	0.324	0.143	1
Lsamp	0.0116986	-0.432448	0.903	0.9	1
Ddx50	0.0118222	0.407923	0.324	0.143	1
Cdk7	0.0118423	0.405551	0.161	0.043	1
Pmm2	0.0118463	0.387592	0.167	0.043	1
Trpm2	0.011855	-0.549917	0.042	0.114	1
Ppme1	0.0118758	0.520364	0.139	0.029	1
Arhgdia	0.0120657	0.509158	0.109	0.014	1
Ptgs1	0.0120912	-0.692738	0.236	0.329	1
Rell1	0.0122898	0.36468	0.139	0.029	1
Apba1	0.0122964	-0.704316	0.394	0.471	1
AB124611	0.0123788	0.474711	0.109	0.014	1
4933434E20Rik	0.0125638	0.384136	0.206	0.071	1
Dennd2a	0.0125925	0.507935	0.164	0.043	1
BC005561	0.0126444	0.299386	0.139	0.029	1
Asb10	0.0126859	0.451724	0.112	0.014	1
Zfp512	0.0127142	0.468858	0.206	0.071	1
Rpl35a	0.0127661	0.475168	0.112	0.014	1
Nln	0.0128285	0.413665	0.233	0.086	1
Sept9	0.0128467	0.389994	0.112	0.014	1
Bbx	0.0128773	0.426243	0.279	0.114	1
Lclat1	0.0129277	0.325552	0.112	0.014	1
Prrc2b	0.0129312	0.317998	0.285	0.114	1
Dcun1d2	0.0130266	0.516903	0.109	0.014	1
Myo9b	0.0130752	0.534412	0.427	0.229	1
Ring1	0.0131107	-0.631487	0.064	0.143	1
Rnf144b	0.0132063	0.390937	0.206	0.071	1
Ecpas	0.0132492	0.397799	0.464	0.257	1
Znrf2	0.0133175	0.344625	0.403	0.2	1
Rasgef1b	0.0133595	0.441144	0.233	0.086	1
Lpin1	0.0133661	0.483615	0.209	0.071	1
C3ar1	0.0135217	0.503538	0.158	0.043	1
Mia3	0.0135255	0.378677	0.23	0.086	1
Ubn2	0.0135621	0.447872	0.555	0.343	1
Slc15a2	0.013591	0.509164	0.136	0.029	1
Klhdc10	0.013618	0.285119	0.258	0.1	1
Rap2b	0.0137042	0.47046	0.109	0.014	1
Snx9	0.0137769	0.294173	0.3	0.129	1
Ctnna1	0.01378	0.462455	0.206	0.071	1
Taf3	0.0138451	0.41522	0.206	0.071	1
Gigyf1	0.013876	0.466056	0.245	0.1	1
Rtcb	0.0139032	0.453983	0.136	0.029	1
Osbp	0.014042	0.43766	0.206	0.071	1
Ranbp10	0.0141939	0.443267	0.37	0.186	1
Iqch	0.0142326	0.495187	0.109	0.014	1
Celf1	0.0142776	0.404863	0.636	0.4	1
Ube3c	0.0143283	0.445343	0.33	0.157	1
Fbxo42	0.0143649	0.373833	0.185	0.057	1
Gm7072	0.0144127	0.458867	0.109	0.014	1
Wls	0.0144291	0.322176	0.445	0.243	1
Slc45a4	0.0144357	0.400525	0.185	0.057	1
Napg	0.0144468	0.461483	0.158	0.043	1
Asb2	0.014563	-0.687676	0.055	0.129	1
Ifnar1	0.0146475	0.449196	0.206	0.071	1
Rcbtb1	0.0146866	0.393736	0.109	0.014	1
Akirin1	0.0147162	0.392269	0.206	0.071	1
St8sia4	0.0147388	0.459154	0.179	0.057	1
Cacul1	0.0148968	0.44453	0.27	0.114	1
Nvl	0.0149332	0.495643	0.221	0.086	1
Vps4b	0.01494	0.419705	0.185	0.057	1
Kat2b	0.0149445	0.321994	0.339	0.157	1
Sema6a	0.0149593	-0.762317	0.182	0.286	1
Foxo3	0.0150021	0.517984	0.424	0.214	1
Mrps9	0.0150763	0.539523	0.13	0.029	1
Uchl3	0.0150855	-0.61789	0.073	0.157	1
Herc2	0.0152265	-0.607657	0.464	0.529	1
Tbc1d2b	0.0152725	0.495334	0.2	0.071	1
Hdlbp	0.0153305	0.353965	0.267	0.114	1
2900026A02Rik	0.015425	0.447311	0.13	0.029	1
Tpcn1	0.0154521	0.341842	0.218	0.086	1
Hnrnpul1	0.0154671	0.429243	0.27	0.114	1
Clta	0.0155363	0.450693	0.606	0.371	1
Morrbid	0.0155487	0.340984	0.158	0.043	1
Rgs7bp	0.0155576	0.537855	0.394	0.214	1
Zc3h6	0.0155623	0.589802	0.148	0.043	1
St6galnac3	0.0158104	0.467366	0.133	0.029	1
Atraid	0.0158104	0.410098	0.133	0.029	1
Gas7	0.0159866	0.571801	0.33	0.171	1
Fam168b	0.0160257	0.329414	0.297	0.129	1
Rogdi	0.0160313	-0.90215	0.136	0.229	1
Gm35154	0.0160799	-0.674187	0.064	0.143	1
Glis3	0.0161589	0.403941	0.227	0.086	1
Slmap	0.0162545	0.409964	0.424	0.214	1
Cox10	0.0162856	0.487635	0.103	0.014	1
Sfmbt1	0.0163773	0.317291	0.548	0.314	1
Tcf7l2	0.0163822	0.254149	0.452	0.243	1
mt-Nd4	0.0164148	-0.73047	0.085	0.171	1
Nbr1	0.016456	0.359574	0.276	0.114	1
Mthfsl	0.0164657	0.423665	0.158	0.043	1
Gtf2f2	0.0165732	0.416789	0.182	0.057	1
Tcirg1	0.0165758	0.347592	0.352	0.171	1
Mrs2	0.0165763	0.4447	0.106	0.014	1
Klhl3	0.0167352	0.361333	0.182	0.057	1
Zc3h13	0.0167832	0.42712	0.221	0.086	1
Cyhr1	0.0167848	0.418897	0.106	0.014	1
Gatad2a	0.01685	0.273983	0.2	0.071	1
Fam219a	0.016946	0.481334	0.412	0.214	1
Narf	0.0170021	0.517442	0.152	0.043	1
Rasa3	0.0170522	0.396858	0.318	0.157	1
Mylip	0.0170997	0.496813	0.533	0.314	1
4932438A13Rik	0.0171528	0.392519	0.391	0.2	1
Gm16867	0.0171832	-0.538724	0.082	0.171	1
Btrc	0.0172213	0.47356	0.279	0.129	1
Ftl1	0.0172821	0.880796	0.285	0.129	1
Slc36a4	0.017349	0.452863	0.103	0.014	1
Eif2ak4	0.0174084	0.357513	0.224	0.086	1
Ankrd17	0.0175018	0.287045	0.57	0.314	1
Snap23	0.0175267	0.413755	0.285	0.129	1
Meaf6	0.0176421	-0.618309	0.076	0.157	1
Agfg1	0.0176511	0.251852	0.182	0.057	1
Slc16a10	0.0176584	0.488298	0.312	0.157	1
Emc2	0.0176706	0.435602	0.13	0.029	1
Csf2ra	0.0176977	0.486921	0.276	0.129	1
Rbms1	0.0177291	0.42546	0.37	0.186	1
Cpne1	0.0177321	0.323125	0.2	0.071	1
Kif21b	0.0177377	-0.542491	0.309	0.4	1
Sp100	0.0178407	0.622323	0.127	0.029	1
Asap3	0.0179292	-0.758641	0.036	0.1	1
Bdp1	0.0179542	0.349993	0.224	0.086	1
Rmdn1	0.0180274	0.438735	0.352	0.171	1
Mettl8	0.0180715	0.421466	0.13	0.029	1
Phldb2	0.0180794	-0.492752	0.036	0.1	1
Unc93b1	0.0182468	-0.411626	0.652	0.657	1
Smurf1	0.0182727	-0.613056	0.182	0.286	1
Naa50	0.0182749	0.417901	0.13	0.029	1
Gm3739	0.018383	-0.521445	0.036	0.1	1
Golgb1	0.0184269	0.367852	0.324	0.157	1
Ldah	0.018443	0.43957	0.218	0.086	1
Hps4	0.0184499	-0.578579	0.276	0.357	1
Pkib	0.0184651	0.411416	0.179	0.057	1
Cep128	0.018518	0.413095	0.155	0.043	1
Fgfr1op2	0.0185545	0.426717	0.179	0.057	1
Acap2	0.0185672	0.467313	0.676	0.514	1
Cfdp1	0.0186544	0.28652	0.2	0.071	1
Ankrd44	0.0187452	-0.350845	0.727	0.7	1
Bax	0.018822	0.433894	0.103	0.014	1
Ap3s1	0.0188265	0.435499	0.2	0.071	1
Ppt1	0.0189049	0.349137	0.327	0.157	1
Aptx	0.0190036	-0.539727	0.036	0.1	1
Chd4	0.0190341	-0.612134	0.367	0.443	1
Srbd1	0.0190983	0.420332	0.194	0.071	1
Cpeb4	0.0192598	0.4468	0.379	0.2	1
Atf6	0.0192924	0.275267	0.309	0.143	1
Aup1	0.0193723	0.404157	0.145	0.043	1
Stk25	0.0193952	0.340482	0.155	0.043	1
Zfp704	0.0196853	0.253206	0.452	0.257	1
Slc16a7	0.0196899	0.399089	0.33	0.171	1
Stx8	0.0198141	0.428975	0.467	0.271	1
Zfp869	0.0198675	-0.510474	0.045	0.114	1
Sytl2	0.019888	-0.709442	0.115	0.2	1
Nf2	0.0199887	0.391072	0.188	0.071	1
Gabpb2	0.0200224	0.329497	0.221	0.086	1
Clybl	0.0200609	0.358516	0.227	0.1	1
Atxn2	0.0200819	0.468884	0.455	0.257	1
Rpl12	0.0201894	0.448408	0.127	0.029	1
Ncoa6	0.020341	0.310459	0.288	0.129	1
Lrrc58	0.0204142	0.467697	0.145	0.043	1
Ly6e	0.020521	-0.903974	0.112	0.2	1
Secisbp2	0.0205321	0.379819	0.2	0.071	1
St18	0.0206238	-0.796693	0.261	0.343	1
Ramp1	0.0206443	0.384213	0.127	0.029	1
Adgre1	0.0207348	0.344125	0.618	0.357	1
Tfec	0.0207594	0.347387	0.127	0.029	1
Fat3	0.0208056	-0.909289	0.212	0.3	1
Gigyf2	0.0208532	0.34672	0.388	0.2	1
Sept4	0.0209359	-0.643832	0.103	0.186	1
Fam76a	0.0209753	0.381659	0.152	0.043	1
Mob3c	0.0209913	0.361662	0.127	0.029	1
Slx4ip	0.0210199	0.463371	0.209	0.086	1
Vsir	0.0210267	-0.529027	0.415	0.471	1
Aopep	0.0210425	0.476827	0.439	0.243	1
Gabbr1	0.0211352	-0.67597	0.152	0.243	1
Cdc5l	0.0211612	0.424054	0.176	0.057	1
Lima1	0.0211798	0.437493	0.218	0.086	1
Xpot	0.0211884	0.405059	0.191	0.071	1
Ap3m1	0.0212344	0.457619	0.1	0.014	1
Gmcl1	0.0213258	0.446753	0.124	0.029	1
Vps41	0.0213361	0.352435	0.388	0.2	1
Slc43a2	0.0213514	0.451824	0.47	0.286	1
Magt1	0.021367	0.460881	0.1	0.014	1
Efcab14	0.021395	0.367259	0.209	0.086	1
Ing4	0.0214618	0.3583	0.224	0.086	1
Eprs	0.0214918	0.424494	0.215	0.086	1
Hook2	0.0215002	0.457533	0.1	0.014	1
Gna13	0.0215342	0.43537	0.297	0.143	1
Sec22b	0.0217689	0.41003	0.1	0.014	1
Malsu1	0.0217689	0.4061	0.1	0.014	1
Ubr4	0.0218033	0.367644	0.212	0.086	1
Sugct	0.0218078	0.580409	0.124	0.029	1
Rab21	0.02188	0.275528	0.176	0.057	1
Trappc10	0.0219288	0.36334	0.218	0.086	1
Litaf	0.0219576	0.427881	0.339	0.171	1
Vps16	0.0220404	0.293989	0.1	0.014	1
Usp49	0.0220404	0.378269	0.1	0.014	1
Usp33	0.0220877	0.414469	0.291	0.143	1
Sec62	0.0221723	0.444223	0.236	0.1	1
Slc44a1	0.0222652	0.395722	0.236	0.1	1
Wsb2	0.0222686	0.459625	0.121	0.029	1
Plp1	0.022279	-0.518616	0.585	0.586	1
Rnasel	0.0223585	0.434702	0.236	0.1	1
Cpne3	0.0224236	0.474775	0.124	0.029	1
Plgrkt	0.0224353	0.413912	0.412	0.229	1
Ehbp1	0.022513	0.328759	0.321	0.157	1
Ube4a	0.0225269	0.320088	0.194	0.071	1
Sec11a	0.0226471	0.386531	0.121	0.029	1
Ppard	0.0227033	0.376483	0.391	0.214	1
Mapkapk2	0.0227747	0.391891	0.173	0.057	1
Ulk2	0.0228057	0.35784	0.715	0.529	1
Vps39	0.0228835	0.424553	0.173	0.057	1
Zfyve16	0.0228835	0.42534	0.173	0.057	1
Cstf3	0.0229014	0.311242	0.261	0.114	1
Morc3	0.0230145	0.363794	0.47	0.257	1
Cul3	0.0231679	0.275619	0.327	0.157	1
Tbck	0.0232368	0.364349	0.352	0.171	1
Ccdc58	0.023384	0.410644	0.148	0.043	1
Sufu	0.0235032	0.407306	0.148	0.043	1
Pclo	0.0236981	0.252589	0.197	0.071	1
Col15a1	0.0237052	-0.563341	0.058	0.129	1
Snx25	0.0237864	0.486066	0.27	0.129	1
U2af2	0.0237902	0.343674	0.282	0.129	1
Ltc4s	0.0237971	-0.716032	0.239	0.314	1
Atpif1	0.0240355	0.362198	0.188	0.071	1
Cndp2	0.0240421	0.476716	0.142	0.043	1
Acer3	0.0243229	0.370621	0.358	0.2	1
Myo18b	0.0243256	-0.796411	0.082	0.157	1
Dock7	0.024377	0.410033	0.382	0.2	1
Mcph1	0.0243978	0.253077	0.23	0.1	1
Hdac8	0.0246426	0.380333	0.433	0.243	1
Hnrnpf	0.0249583	0.44702	0.145	0.043	1
Pcsk2	0.0249985	0.55866	0.139	0.043	1
Tor1aip2	0.0251192	0.474377	0.23	0.1	1
Vps35	0.0251192	0.327861	0.23	0.1	1
0610040J01Rik	0.0251619	-0.452649	0.467	0.5	1
Ckb	0.0251702	-0.817673	0.306	0.371	1
Pgap1	0.0253068	0.502375	0.161	0.057	1
Tnrc6c	0.0253797	0.40181	0.512	0.3	1
Gak	0.0254514	0.404696	0.294	0.143	1
Rasal2	0.0254907	0.298353	0.573	0.329	1
Optn	0.0255735	0.420513	0.118	0.029	1
Blvrb	0.0255743	0.414913	0.17	0.057	1
S100pbp	0.0255969	0.411657	0.121	0.029	1
Inpp5a	0.0256827	0.418369	0.167	0.057	1
Arfgap2	0.0257166	0.434164	0.118	0.029	1
BC005537	0.0258097	0.303127	0.218	0.086	1
Pphln1	0.026238	0.365326	0.167	0.057	1
Mbd6	0.0262442	0.38837	0.194	0.071	1
Trim2	0.0262442	-0.712837	0.158	0.243	1
Bmt2	0.0265209	0.318884	0.239	0.1	1
Pde1c	0.0265444	-0.555863	0.039	0.1	1
Ankrd11	0.026558	0.331141	0.7	0.471	1
Pip4k2b	0.0266564	0.381642	0.145	0.043	1
Pggt1b	0.0266757	0.371835	0.121	0.029	1
Tmlhe	0.0268135	0.498958	0.221	0.1	1
4930473A02Rik	0.0268962	0.361639	0.121	0.029	1
Bms1	0.0268962	0.257225	0.121	0.029	1
Tpcn2	0.0272397	0.493872	0.112	0.029	1
Prkag2	0.0272748	0.424522	0.188	0.071	1
Ubr3	0.027317	0.267216	0.461	0.257	1
Bank1	0.0273474	-0.616899	0.164	0.257	1
Usp40	0.027351	0.399196	0.276	0.129	1
Rad23b	0.0274577	0.415851	0.142	0.043	1
Dtx3	0.027478	0.442882	0.236	0.1	1
Parp4	0.0277039	0.408911	0.139	0.043	1
Rnf149	0.0277502	0.330212	0.145	0.043	1
Pid1	0.027888	0.512968	0.748	0.571	1
2610507B11Rik	0.0279814	0.311294	0.252	0.114	1
Tbl1x	0.0282173	0.412033	0.418	0.257	1
Rap1b	0.0282933	0.331674	0.445	0.257	1
Lmbrd1	0.0283405	0.314414	0.215	0.086	1
Tmem68	0.0285692	0.459939	0.118	0.029	1
5330438D12Rik	0.0286302	-0.800706	0.355	0.414	1
Il31ra	0.0286684	-0.47155	0.039	0.1	1
Fmnl2	0.0287479	0.499506	0.548	0.357	1
Ripk1	0.0287593	0.439315	0.164	0.057	1
Ncln	0.0289658	-0.555575	0.07	0.143	1
Stard8	0.0289881	0.393853	0.379	0.214	1
Sil1	0.0289909	0.359585	0.233	0.1	1
Phf20l1	0.0290269	0.265398	0.479	0.271	1
Myo1d	0.029117	-0.645235	0.118	0.2	1
St3gal3	0.0292308	0.377518	0.37	0.2	1
Itsn2	0.0292648	0.441777	0.515	0.314	1
Rab5b	0.0292899	0.385076	0.188	0.071	1
Fbxo34	0.0293173	0.423724	0.142	0.043	1
Stxbp6	0.0293657	-0.736614	0.061	0.129	1
Sat1	0.0293889	0.35992	0.585	0.386	1
Tmx3	0.0295354	0.530288	0.158	0.057	1
Gpi1	0.0295839	0.382996	0.233	0.1	1
Ttyh1	0.0296484	-0.719252	0.082	0.157	1
AW549877	0.0296816	0.396676	0.188	0.071	1
Zfp942	0.0296868	0.390173	0.118	0.029	1
Cmya5	0.0297844	-0.422182	0.039	0.1	1
Cemip2	0.0298425	0.381545	0.115	0.029	1
Zbtb4	0.0298495	0.380007	0.118	0.029	1
Slc8b1	0.030013	0.421904	0.118	0.029	1
Rpl10	0.030013	0.386891	0.118	0.029	1
Sp4	0.030326	-0.643973	0.082	0.157	1
Ksr1	0.0304286	0.374166	0.164	0.057	1
Eloa	0.0305082	0.400668	0.115	0.029	1
Mapk1ip1	0.0305141	-0.538059	0.061	0.129	1
Dleu2	0.0305298	-0.363833	0.812	0.829	1
Adamts16	0.0305714	0.425775	0.164	0.057	1
Rapgef5	0.0306039	-0.457612	0.597	0.586	1
Gnptab	0.0306062	0.341002	0.203	0.086	1
Arhgap21	0.0306098	0.435681	0.206	0.086	1
Scn3a	0.0307092	-0.569081	0.061	0.129	1
Sltm	0.0307765	0.366785	0.427	0.229	1
Gmps	0.0308418	0.328559	0.118	0.029	1
Ap3s2	0.0308419	0.344208	0.118	0.029	1
Aqr	0.0309212	0.309491	0.167	0.057	1
Adam22	0.0311568	0.384889	0.188	0.071	1
Tmem245	0.0312406	-0.689059	0.188	0.271	1
Slc25a26	0.0314376	0.467939	0.139	0.043	1
Glb1	0.0315569	0.400796	0.185	0.071	1
Dph6	0.0315956	0.391441	0.139	0.043	1
Spire1	0.0316377	0.306346	0.421	0.229	1
Rbx1	0.0317038	0.376918	0.115	0.029	1
Sumf1	0.0318928	0.429405	0.136	0.043	1
Clec2d	0.0318928	0.485363	0.136	0.043	1
Ccdc93	0.0319308	0.391558	0.4	0.214	1
Prag1	0.0319734	0.401338	0.136	0.043	1
Astn2	0.0320226	0.33299	0.212	0.086	1
Csf2rb	0.0320313	0.335016	0.164	0.057	1
Taf2	0.032135	0.452542	0.136	0.043	1
Mindy2	0.0321353	0.438952	0.267	0.129	1
Atg4c	0.0322294	0.318945	0.142	0.043	1
Lactb2	0.0323396	0.411551	0.203	0.086	1
Hipk2	0.0323892	-0.527244	0.339	0.414	1
Immt	0.0324102	0.303624	0.188	0.071	1
Anxa4	0.0324807	0.353721	0.164	0.057	1
Lrrc4	0.0325188	0.31487	0.245	0.114	1
Kidins220	0.032679	0.265304	0.47	0.286	1
Setbp1	0.0328713	0.496671	0.136	0.043	1
Uvssa	0.0328713	0.418859	0.136	0.043	1
Ctdsp2	0.0329867	-0.568474	0.082	0.157	1
Sbno1	0.0330369	0.309701	0.412	0.229	1
Stmn2	0.0330945	-0.580316	0.052	0.114	1
Pcdh15	0.0331849	0.251945	0.255	0.114	1
Brd3	0.0333	0.410199	0.115	0.029	1
Enpp1	0.0334815	0.377233	0.115	0.029	1
Trim26	0.0335193	-0.784668	0.167	0.243	1
Dusp16	0.033644	-0.494232	0.07	0.143	1
Plcg2	0.0336703	-0.630933	0.424	0.471	1
Tcea1	0.0337554	0.431232	0.221	0.1	1
Gm49359	0.0338527	0.420376	0.112	0.029	1
Thsd7a	0.0339765	-0.711161	0.121	0.2	1
Rtf2	0.0340312	0.367573	0.115	0.029	1
Serac1	0.0340312	0.35676	0.115	0.029	1
Gm40841	0.0340328	0.373624	0.348	0.186	1
Gjc3	0.0340453	-0.546256	0.106	0.186	1
Orc3	0.0341691	0.289195	0.233	0.1	1
Kctd3	0.0342161	0.372376	0.115	0.029	1
Timp2	0.0343693	0.468862	0.276	0.143	1
Stk11	0.0344139	0.396659	0.112	0.029	1
Rcsd1	0.034435	-0.424416	0.361	0.443	1
Mpp1	0.0344502	0.262754	0.185	0.071	1
Zc3h7b	0.0344848	-0.569272	0.073	0.143	1
Tcp11l1	0.0345886	0.363076	0.115	0.029	1
Akr1a1	0.0347299	0.355959	0.373	0.2	1
Dhx32	0.0347761	0.326317	0.115	0.029	1
Prex1	0.0349054	-0.411207	0.497	0.529	1
Psmd1	0.035019	0.409708	0.258	0.129	1
Wdr47	0.0351537	0.330799	0.115	0.029	1
Btbd9	0.0352158	0.27926	0.748	0.529	1
Myo1e	0.0353326	0.363668	0.297	0.157	1
Slc38a10	0.0353575	0.287	0.182	0.071	1
Tfeb	0.035625	0.454231	0.294	0.157	1
Gm31243	0.0359914	-0.498084	0.052	0.114	1
Atp6v0c	0.0360286	0.255974	0.258	0.114	1
Ipo5	0.0365403	0.348999	0.112	0.029	1
Tdrd7	0.0366646	0.331405	0.158	0.057	1
Jak2	0.0367293	0.352946	0.161	0.057	1
Cwc27	0.0368539	0.42936	0.255	0.129	1
Ank	0.0368596	0.250718	0.388	0.214	1
Mgll	0.036883	0.380022	0.361	0.2	1
Naa35	0.0369046	0.325283	0.285	0.143	1
Myo7a	0.0369106	0.441858	0.106	0.029	1
Sec31a	0.0370614	0.389296	0.176	0.071	1
Babam2	0.0371995	0.340937	0.421	0.243	1
Naa40	0.0372468	0.403184	0.179	0.071	1
Arhgef1	0.0373231	0.39561	0.403	0.243	1
Ppp4c	0.0373249	0.346472	0.133	0.043	1
Hvcn1	0.0374091	0.32313	0.161	0.057	1
Lrsam1	0.037414	0.327856	0.136	0.043	1
Epha5	0.0375213	0.462192	0.158	0.057	1
Pik3ap1	0.0375403	0.298284	0.512	0.329	1
Dnajc21	0.0377434	-0.612103	0.042	0.1	1
Zfp329	0.0377467	0.375295	0.112	0.029	1
Vti1b	0.037753	0.358625	0.161	0.057	1
Cox16	0.0378301	0.369619	0.455	0.286	1
Zbtb38	0.037926	0.299012	0.161	0.057	1
Yipf5	0.037971	0.363435	0.136	0.043	1
Vps11	0.0379801	0.3382	0.133	0.043	1
Hexb	0.0381799	-0.308675	0.948	0.871	1
Slc12a2	0.0382066	0.276113	0.542	0.329	1
Kansl3	0.038274	0.310231	0.161	0.057	1
Cog2	0.0385696	0.352676	0.112	0.029	1
Rcn2	0.0387778	0.337744	0.112	0.029	1
Vps9d1	0.0391062	0.299664	0.136	0.043	1
Jup	0.0391216	-0.496002	0.042	0.1	1
Pyroxd2	0.0391414	0.270281	0.221	0.1	1
Prpf39	0.0392795	0.286127	0.33	0.171	1
Nrxn1	0.0393882	-0.339	0.779	0.771	1
Tnrc6a	0.0395055	-0.550527	0.4	0.457	1
Asah2	0.0395474	0.513186	0.106	0.029	1
Paip2	0.0395818	-0.57094	0.194	0.271	1
Egln1	0.0396197	0.31954	0.112	0.029	1
Trpv2	0.0396197	0.314239	0.112	0.029	1
Trap1	0.0396197	0.304981	0.112	0.029	1
Cln3	0.0398361	0.400486	0.215	0.1	1
Pdlim5	0.0398499	0.343051	0.258	0.129	1
Alkbh3	0.0398789	0.305601	0.136	0.043	1
Mpeg1	0.0398915	0.416189	0.191	0.086	1
Stat6	0.0400113	0.292052	0.158	0.057	1
F11r	0.0401204	-0.651574	0.191	0.271	1
Arhgap35	0.0401547	0.338393	0.215	0.1	1
Tlk1	0.0402732	0.378337	0.445	0.271	1
Plekhh2	0.0402821	0.367894	0.218	0.1	1
Ccm2	0.0402894	0.322295	0.3	0.157	1
Ofd1	0.0403079	0.38927	0.109	0.029	1
Gmfb	0.0404669	0.250906	0.136	0.043	1
Dync1li1	0.0404758	0.350469	0.245	0.114	1
Slf1	0.0405061	0.400152	0.13	0.043	1
Cenpp	0.0405423	-0.501348	0.042	0.1	1
Eif4g3	0.0406382	0.263103	0.727	0.5	1
Ptp4a2	0.0409067	0.280537	0.376	0.214	1
Susd1	0.0409666	0.46977	0.109	0.029	1
Pnp	0.0409802	-0.536335	0.064	0.129	1
Gclm	0.0411226	-0.632946	0.042	0.1	1
Socs6	0.041137	0.428344	0.173	0.071	1
Naip5	0.0412665	0.303528	0.2	0.086	1
Clpp	0.0414108	0.431711	0.109	0.029	1
Snhg11	0.0414463	-0.379328	0.673	0.657	1
Nek1	0.0416311	0.382401	0.155	0.057	1
Itgav	0.0417774	0.317528	0.355	0.2	1
Scd2	0.0419152	0.407572	0.133	0.043	1
Ncoa4	0.0420412	0.319	0.179	0.071	1
Mospd2	0.0421423	0.344015	0.13	0.043	1
Aak1	0.0425145	0.343652	0.515	0.343	1
P4ha1	0.0425851	0.423164	0.436	0.271	1
5031439G07Rik	0.0428254	0.355718	0.245	0.114	1
Dgcr2	0.0428332	0.281707	0.158	0.057	1
Tmem199	0.0434605	0.349765	0.109	0.029	1
Slc10a7	0.0434878	0.438009	0.279	0.143	1
Gcnt1	0.0435092	0.371706	0.152	0.057	1
Ttc7b	0.0436425	0.310846	0.279	0.143	1
2610037D02Rik	0.0436743	0.325877	0.212	0.1	1
Pacrg	0.0436935	0.36774	0.109	0.029	1
Tsc1	0.0438066	0.370937	0.261	0.129	1
2310015A10Rik	0.043834	0.41283	0.13	0.043	1
Rab3il1	0.0439534	0.349597	0.279	0.143	1
Parp2	0.0440494	0.306092	0.13	0.043	1
Tmem127	0.0441626	0.30847	0.109	0.029	1
Kcnq1	0.0442229	0.32229	0.133	0.043	1
Dcp1b	0.0442658	0.322108	0.13	0.043	1
Nfya	0.0445511	0.341883	0.197	0.086	1
Aatf	0.0446581	0.280742	0.285	0.143	1
Exd2	0.04468	-0.625232	0.076	0.143	1
Ambra1	0.0447787	0.425005	0.494	0.329	1
Nup153	0.0449919	0.370564	0.191	0.086	1
Cops3	0.0450285	-0.599385	0.115	0.186	1
Actr10	0.0451135	0.306706	0.109	0.029	1
Dhx8	0.0451135	0.30366	0.109	0.029	1
Fam120a	0.0451837	0.355614	0.367	0.2	1
Rnf213	0.0452507	0.399693	0.212	0.1	1
Acly	0.0453609	0.267445	0.13	0.043	1
Phrf1	0.0454662	0.384803	0.148	0.057	1
Slc39a11	0.0455407	0.332984	0.152	0.057	1
Pacs1	0.0455671	0.334809	0.445	0.286	1
Otulin	0.0456088	0.316221	0.264	0.129	1
Atf2	0.0458914	0.393882	0.276	0.143	1
Fbxo33	0.0458931	-0.511395	0.064	0.129	1
Nnat	0.0462031	0.334808	0.176	0.071	1
Vps29	0.0462862	0.352869	0.127	0.043	1
Avl9	0.0463663	0.313372	0.255	0.129	1
Rcc2	0.046586	0.294686	0.152	0.057	1
Dgkh	0.0468194	0.303495	0.173	0.071	1
Rptor	0.0469194	-0.530775	0.6	0.6	1
Cotl1	0.0469366	0.306725	0.342	0.186	1
Hmgcl	0.0470494	0.333539	0.155	0.057	1
Zmynd11	0.0471784	-0.604716	0.33	0.371	1
Snx12	0.0472877	0.432519	0.145	0.057	1
AY036118	0.0473353	-0.321652	0.612	0.586	1
Dek	0.0479003	0.298395	0.127	0.043	1
Sipa1l2	0.0479391	0.267127	0.603	0.4	1
Stat1	0.0480264	0.394782	0.148	0.057	1
Pacc1	0.0482733	0.333229	0.27	0.143	1
Naa20	0.0484517	0.320518	0.282	0.143	1
Wipf2	0.0486233	0.31164	0.191	0.086	1
Ewsr1	0.0487733	0.269641	0.515	0.314	1
Tbc1d32	0.0487844	0.292289	0.13	0.043	1
Zfp993	0.0488438	0.345671	0.127	0.043	1
Grm7	0.0491687	0.255277	0.367	0.2	1
4931406C07Rik	0.04929	0.413041	0.103	0.029	1
Gm13684	0.0494758	0.260231	0.106	0.029	1
Phka2	0.0495341	0.255351	0.3	0.157	1
Smim14	0.0496088	0.374212	0.309	0.171	1
1810026B05Rik	0.0496128	0.318241	0.215	0.1	1
Ptpn11	0.0498628	0.260594	0.155	0.057	1
Gm2245	0.0499212	0.27233	0.33	0.186	1
Ugp2	0.049981	0.29886	0.2	0.086	1
Dennd1b	0.0499975	0.308852	0.306	0.171	1
Gmpr	0.050003	0.304745	0.106	0.029	1
Fchsd2	0.050092	-0.301421	0.824	0.814	1
Lrp1	0.0502114	0.266199	0.679	0.486	1
Kri1	0.0503589	0.363537	0.103	0.029	1
Gon4l	0.050448	0.301066	0.364	0.2	1
Pigv	0.0505347	0.286677	0.106	0.029	1
Ip6k2	0.0505347	0.289685	0.106	0.029	1
Zfp808	0.0506291	0.388415	0.103	0.029	1
Arhgap45	0.051013	-0.36371	0.715	0.714	1
Ugcg	0.0510713	0.2616	0.106	0.029	1
Cmklr1	0.051131	-0.617356	0.112	0.186	1
Rnf185	0.0511654	0.311651	0.148	0.057	1
Prpf38b	0.0514036	0.299117	0.258	0.129	1
Cnnm3	0.0516125	0.253773	0.106	0.029	1
Ppip5k2	0.0517234	0.290123	0.209	0.1	1
Pgm1	0.0518599	0.385184	0.148	0.057	1
Gm10134	0.0522761	0.351575	0.103	0.029	1
Dram2	0.0525228	0.29505	0.294	0.157	1
Tbc1d22a	0.0525852	0.293123	0.621	0.414	1
Ppp2r5c	0.0525879	0.292435	0.467	0.271	1
Elp4	0.0525976	0.366564	0.245	0.129	1
Tcf12	0.0526771	0.346432	0.636	0.443	1
Rtn1	0.0527398	-0.765507	0.185	0.257	1
Slit1	0.0531163	0.381889	0.103	0.029	1
2210408I21Rik	0.053139	0.337251	0.209	0.1	1
Uhrf1bp1l	0.0532	0.38637	0.17	0.071	1
Mpp5	0.0532959	0.392185	0.182	0.086	1
Helz	0.0533909	0.286883	0.473	0.286	1
Ddx31	0.0535221	0.331981	0.206	0.1	1
Slc30a5	0.0535256	0.315864	0.188	0.086	1
Lbr	0.053585	-0.486696	0.045	0.1	1
Erf	0.053585	-0.557294	0.045	0.1	1
Adamts10	0.0536377	0.448923	0.142	0.057	1
Otud7a	0.0536826	0.391538	0.103	0.029	1
Ankrd39	0.0543027	-0.59076	0.045	0.1	1
Setd3	0.0543699	0.307471	0.279	0.143	1
Ngly1	0.0544378	0.330502	0.145	0.057	1
Diaph1	0.0554119	0.341299	0.103	0.029	1
Rufy2	0.0555286	0.334213	0.167	0.071	1
Rhoh	0.0555823	0.298515	0.355	0.2	1
Ptprt	0.0561603	0.394814	0.206	0.1	1
Zfp697	0.0561715	0.327742	0.145	0.057	1
Macrod1	0.0564177	0.388749	0.1	0.029	1
Szrd1	0.0567079	0.345534	0.167	0.071	1
Cnot6	0.0567187	0.30822	0.1	0.029	1
E2f4	0.0568779	-0.525823	0.045	0.1	1
Ankrd52	0.0568883	0.307443	0.103	0.029	1
Slc31a1	0.0569991	0.443543	0.161	0.071	1
Unc79	0.057138	-0.521185	0.115	0.186	1
Dgki	0.0571454	0.276663	0.209	0.1	1
Prdx5	0.0572539	-0.487822	0.045	0.1	1
March3	0.0573952	0.527767	0.142	0.057	1
Wdyhv1	0.0574879	0.268471	0.103	0.029	1
Srpk2	0.0575684	0.263629	0.518	0.314	1
Zfp182	0.0575813	0.372808	0.209	0.1	1
Tnfrsf13b	0.0576026	-0.541424	0.058	0.114	1
Txnrd2	0.0576296	0.359638	0.1	0.029	1
Gga1	0.0581724	0.342967	0.142	0.057	1
Mob1a	0.0581724	-0.599186	0.07	0.129	1
Ptpn6	0.0581823	0.293145	0.185	0.086	1
Slc22a17	0.0581885	-0.744187	0.197	0.257	1
Man2c1	0.0582434	0.339163	0.1	0.029	1
Kpna1	0.0583228	0.27531	0.17	0.071	1
Prr5l	0.0585602	0.373866	0.121	0.043	1
Map1s	0.0589935	-0.544892	0.058	0.114	1
Drosha	0.0590619	-0.485865	0.091	0.157	1
Adk	0.0591826	0.253917	0.258	0.129	1
Fam91a1	0.0593035	0.344909	0.248	0.129	1
Wnk2	0.0593456	-0.574259	0.058	0.114	1
9930021J03Rik	0.0595806	0.272225	0.273	0.143	1
Ints6	0.0595813	0.359686	0.206	0.1	1
Atp11c	0.0596213	0.284952	0.252	0.129	1
BC005624	0.0596282	-0.552308	0.079	0.143	1
Etfa	0.0598718	0.309714	0.167	0.071	1
Pigt	0.0600549	-0.609317	0.058	0.114	1
Zfp654	0.0605073	0.355621	0.139	0.057	1
Exosc10	0.0605335	0.296373	0.17	0.071	1
Acbd5	0.0605473	0.280071	0.191	0.086	1
Oma1	0.0607112	0.252177	0.209	0.1	1
Lrfn5	0.0607855	-0.804774	0.145	0.214	1
Rps14	0.0612811	-0.584795	0.145	0.214	1
Ankib1	0.061308	0.291764	0.245	0.129	1
Rab7	0.0613084	0.255431	0.33	0.186	1
Hcfc2	0.0613954	0.329497	0.1	0.029	1
Zfp568	0.0614406	0.337844	0.121	0.043	1
Pdcd10	0.0616028	0.316339	0.124	0.043	1
Khdrbs1	0.0616175	0.263666	0.43	0.257	1
Rsbn1	0.0618053	-0.523636	0.224	0.286	1
Klhl18	0.0618948	0.285466	0.124	0.043	1
Zswim8	0.0619574	0.313065	0.252	0.129	1
Syk	0.0620109	0.319946	0.476	0.314	1
Pfkl	0.0623272	0.300983	0.121	0.043	1
Fem1c	0.062368	0.334987	0.1	0.029	1
Elovl6	0.0624701	-0.610025	0.07	0.129	1
Ap4e1	0.0624823	0.261634	0.124	0.043	1
Uchl5	0.0624824	0.253331	0.124	0.043	1
Ttll4	0.0625236	-0.642974	0.082	0.143	1
Themis2	0.0627779	0.289243	0.124	0.043	1
Agrn	0.0627999	-0.477204	0.079	0.143	1
Ikbkb	0.062827	0.299822	0.3	0.171	1
Ilkap	0.0629646	0.359198	0.182	0.086	1
Mfsd14b	0.0630235	0.337549	0.1	0.029	1
D030028A08Rik	0.0633344	-0.465514	0.058	0.114	1
Arl4c	0.0633534	0.332636	0.1	0.029	1
Camkmt	0.0634414	0.374915	0.167	0.071	1
Tent4b	0.0637353	0.349212	0.276	0.157	1
Gatad2b	0.06375	0.293943	0.3	0.171	1
Myo1b	0.0638951	-0.548136	0.058	0.114	1
Ssh1	0.0641428	0.338802	0.142	0.057	1
H2afz	0.0643516	0.305144	0.1	0.029	1
Upf1	0.0645613	0.346447	0.118	0.043	1
Plpp1	0.0646872	0.322382	0.1	0.029	1
Engase	0.0647435	0.29089	0.121	0.043	1
Zdhhc9	0.0650242	0.25638	0.1	0.029	1
Nr2c1	0.0650242	0.251768	0.1	0.029	1
Chkb	0.065829	0.286914	0.145	0.057	1
Syne1	0.0658352	0.281597	0.297	0.171	1
Cep350	0.0658402	0.324532	0.394	0.229	1
Rnf14	0.0661157	0.259381	0.145	0.057	1
Trappc6b	0.0663403	-0.726059	0.121	0.186	1
Ccdc141	0.0663725	-0.700467	0.058	0.114	1
Zfp606	0.0664845	-0.502649	0.048	0.1	1
4930581F22Rik	0.0664845	-0.670319	0.048	0.1	1
Fus	0.0669531	-0.490725	0.697	0.671	1
Actr2	0.0671487	0.290804	0.476	0.3	1
Rgs19	0.0673247	-0.625108	0.048	0.1	1
Elavl1	0.0674545	0.260702	0.212	0.1	1
Gm46224	0.0676071	0.309569	0.142	0.057	1
Katnbl1	0.067872	0.316277	0.121	0.043	1
Elf4	0.0679619	0.263846	0.306	0.171	1
Mef2a	0.0680158	-0.353607	0.858	0.8	1
Taf1d	0.0681114	0.29437	0.321	0.186	1
Ets1	0.0683315	-0.443217	0.058	0.114	1
Ep300	0.068335	0.273732	0.47	0.286	1
Hs2st1	0.0684054	0.366382	0.279	0.157	1
Gstz1	0.068729	-0.422402	0.058	0.114	1
Klf3	0.0687465	0.256101	0.285	0.157	1
Nck1	0.0687999	0.274065	0.191	0.086	1
Rnf8	0.0688343	0.302782	0.121	0.043	1
Tyrobp	0.0690717	0.268585	0.267	0.143	1
Bcl2l11	0.0691278	0.301434	0.203	0.1	1
Rc3h2	0.0693055	-0.510077	0.261	0.329	1
Lifr	0.0693962	-0.641594	0.115	0.186	1
Pi4kb	0.0694106	0.313363	0.2	0.1	1
Adgra3	0.0694632	-0.457801	0.048	0.1	1
Tln2	0.0695163	0.410721	0.427	0.271	1
Clec4a2	0.0695296	-0.384951	0.058	0.114	1
Gfpt1	0.0696981	0.335779	0.142	0.057	1
Pex13	0.0698975	-0.604987	0.048	0.1	1
Mapk8	0.070043	0.30715	0.158	0.071	1
Uqcrc2	0.0701351	0.267358	0.121	0.043	1
Max	0.0701923	0.322501	0.2	0.1	1
Luzp1	0.0705173	0.286095	0.185	0.086	1
Nub1	0.0709562	0.284068	0.209	0.1	1
Fam168a	0.071004	-0.486528	0.342	0.386	1
Map2k1	0.0710188	-0.528018	0.309	0.357	1
Dnajc1	0.0713483	0.300325	0.47	0.3	1
Hip1	0.071388	0.37585	0.179	0.086	1
AU040320	0.0720686	-0.618595	0.188	0.243	1
Wwc2	0.0722938	0.250238	0.333	0.186	1
Fbxl5	0.0727216	0.271144	0.185	0.086	1
Gbp7	0.0730008	-0.44771	0.048	0.1	1
Map4k2	0.0730008	-0.523567	0.048	0.1	1
Rps15a	0.0731353	-0.604206	0.097	0.157	1
Tbxas1	0.07314	0.319442	0.709	0.557	1
Sbf2	0.0732687	0.304742	0.706	0.486	1
Vps53	0.0733695	0.268125	0.118	0.043	1
Acvr2b	0.0735046	-0.659682	0.061	0.114	1
Slc25a3	0.0736107	-0.495152	0.267	0.329	1
Kcnt2	0.0738026	-0.605192	0.082	0.143	1
Rhbdd1	0.0740593	0.362539	0.118	0.043	1
Tmem178b	0.0744976	0.316827	0.158	0.071	1
Lst1	0.0748191	-0.644122	0.133	0.2	1
Uqcc1	0.0749709	0.298416	0.161	0.071	1
Ctso	0.0752856	-0.639665	0.048	0.1	1
Cers6	0.0755419	0.261421	0.388	0.243	1
Slc22a23	0.0756977	0.30584	0.221	0.114	1
Srebf2	0.0760199	0.274507	0.164	0.071	1
Prmt3	0.0762022	0.354552	0.112	0.043	1
Kpnb1	0.0764282	-0.575149	0.106	0.171	1
Exoc3	0.0765025	0.33277	0.161	0.071	1
Washc3	0.077041	0.332456	0.139	0.057	1
Pdcd11	0.0772293	0.262807	0.118	0.043	1
Tmod3	0.0775116	0.38544	0.152	0.071	1
Cdc14b	0.077604	0.283857	0.136	0.057	1
Pgap2	0.0779485	0.268681	0.118	0.043	1
Baz1b	0.0781959	-0.487742	0.252	0.314	1
Zfand3	0.0782676	0.26514	0.552	0.371	1
A330023F24Rik	0.0785431	0.327692	0.158	0.071	1
Sfpq	0.0785823	0.287989	0.461	0.286	1
Parp8	0.0786461	-0.429294	0.376	0.414	1
Txlna	0.0787874	0.309379	0.136	0.057	1
Dusp6	0.0793024	0.33865	0.115	0.043	1
Lats2	0.0794273	-0.556056	0.121	0.186	1
Tbccd1	0.0795151	0.350441	0.133	0.057	1
Mat2a	0.0795705	-0.540748	0.194	0.257	1
Sec14l1	0.0801094	0.302373	0.385	0.229	1
Tpp2	0.0801994	0.274626	0.379	0.229	1
Rars2	0.0803075	0.335875	0.158	0.071	1
Ilk	0.0807939	0.260088	0.115	0.043	1
Pitpnc1	0.080885	-0.29926	0.742	0.743	1
Mtmr10	0.0810988	0.265599	0.139	0.057	1
Homer1	0.0811702	0.315472	0.115	0.043	1
Scarb2	0.081373	0.254898	0.364	0.214	1
Pprc1	0.0826263	-0.632672	0.061	0.114	1
Ndufaf2	0.08284	0.274102	0.139	0.057	1
Rad50	0.083166	0.335177	0.176	0.086	1
Sugp2	0.0834361	0.340583	0.152	0.071	1
Gusb	0.0838053	0.299691	0.33	0.2	1
Gaa	0.0839554	0.304145	0.155	0.071	1
Cep95	0.0840265	0.299885	0.136	0.057	1
Zfp62	0.0840337	0.2832	0.194	0.1	1
Golph3l	0.0846222	0.272764	0.115	0.043	1
Calm2	0.0846996	-0.533838	0.361	0.386	1
Fam155a	0.0854978	0.353528	0.388	0.243	1
Dennd5b	0.0858634	-0.498995	0.061	0.114	1
Unc80	0.0861299	-0.679514	0.1	0.157	1
Prrc2a	0.086134	-0.594764	0.182	0.243	1
Stard13	0.0862032	-0.533526	0.097	0.157	1
Pygb	0.0865054	0.309548	0.112	0.043	1
C87436	0.0871298	0.330312	0.13	0.057	1
Rnf220	0.0877253	-0.646856	0.236	0.3	1
Rusc2	0.0877422	0.277032	0.155	0.071	1
Dock11	0.0877487	0.271992	0.509	0.329	1
Rbm41	0.0881232	0.259428	0.112	0.043	1
Eml6	0.0883094	0.26427	0.197	0.1	1
Speg	0.0885513	0.312683	0.133	0.057	1
Senp5	0.0887916	0.332557	0.218	0.114	1
Parvb	0.0888514	0.328983	0.17	0.086	1
Trim37	0.0890053	0.36779	0.152	0.071	1
Polk	0.0893086	0.255847	0.133	0.057	1
Atp9b	0.0894115	0.257398	0.47	0.286	1
Mga	0.0895412	0.357369	0.388	0.243	1
Epc2	0.09006	0.293725	0.261	0.143	1
Pon2	0.090071	0.302487	0.133	0.057	1
Rrnad1	0.0903146	0.263565	0.173	0.086	1
Rubcn	0.0903853	0.283472	0.176	0.086	1
Trim30a	0.0904234	0.296938	0.309	0.186	1
Nxph1	0.0904543	0.347239	0.133	0.057	1
Wwc1	0.0905597	-0.524612	0.064	0.114	1
Rnf19a	0.0906244	0.330514	0.152	0.071	1
Scn8a	0.0908311	-0.559673	0.1	0.157	1
Lcorl	0.0915112	0.328161	0.482	0.314	1
mt-Nd1	0.0927101	-0.549956	0.052	0.1	1
Ifnar2	0.0928829	0.340004	0.345	0.214	1
Sv2a	0.093379	-0.78139	0.076	0.129	1
Crybb1	0.0936481	-0.56615	0.136	0.2	1
Dennd4a	0.0943225	-0.558031	0.558	0.529	1
Fbxl17	0.0947541	0.351578	0.736	0.571	1
Tcf20	0.0949574	0.292626	0.397	0.257	1
Nrros	0.0956423	0.262161	0.564	0.4	1
Ldha	0.0959582	0.276297	0.133	0.057	1
Rab39	0.0964432	-0.38475	0.118	0.186	1
Ankrd28	0.0966321	0.299241	0.224	0.129	1
Lpxn	0.0974039	0.334306	0.148	0.071	1
9330159F19Rik	0.0975864	-0.579302	0.103	0.157	1
Atp6v1e1	0.0978137	0.270113	0.212	0.114	1
Dennd5a	0.098643	0.258962	0.391	0.243	1
Xpnpep3	0.09878	0.278835	0.109	0.043	1
Lamc1	0.0988089	0.322951	0.133	0.057	1
Fam126a	0.0989922	0.281344	0.173	0.086	1
Ppp1r21	0.099174	-0.455724	0.315	0.343	1
Ube2f	0.099469	0.265475	0.152	0.071	1
Sh3pxd2a	0.0997612	-0.473987	0.385	0.414	1
Pknox1	0.0998454	0.313991	0.13	0.057	1
Golim4	0.100142	0.260677	0.109	0.043	1
Ints6l	0.100214	0.357159	0.764	0.629	1
Sacm1l	0.100425	0.318771	0.185	0.1	1
Dlgap2	0.100646	0.265806	0.152	0.071	1
Mxi1	0.101316	0.299378	0.227	0.129	1
Rprd2	0.101718	0.258472	0.215	0.114	1
Abi1	0.101816	0.287286	0.542	0.386	1
Cltc	0.101878	0.322604	0.679	0.471	1
Tulp4	0.102397	-0.437998	0.348	0.386	1
Ablim2	0.102447	0.320406	0.109	0.043	1
Ddx39b	0.102526	0.279792	0.333	0.2	1
Kazn	0.102633	-0.728592	0.127	0.186	1
Poldip3	0.103219	-0.601721	0.115	0.171	1
Zbtb20	0.103474	-0.366957	0.758	0.7	1
Sqor	0.103884	0.287832	0.127	0.057	1
Agap1	0.103962	-0.451222	0.23	0.286	1
Sirt2	0.104039	0.358902	0.285	0.171	1
Tesk2	0.10432	0.300297	0.109	0.043	1
Zfp692	0.104539	0.262828	0.106	0.043	1
Acaca	0.104668	0.311228	0.2	0.114	1
Phax	0.104712	-0.303498	0.061	0.114	1
Rab27a	0.104967	0.414743	0.167	0.086	1
Nup214	0.105783	0.287033	0.188	0.1	1
Foxn3	0.106109	-0.314781	0.885	0.771	1
Atp5c1	0.106116	0.311932	0.145	0.071	1
Pak1	0.106161	-0.630622	0.209	0.257	1
Dnajc24	0.106492	-0.413381	0.097	0.157	1
Mbtd1	0.107259	0.291269	0.439	0.286	1
Sulf2	0.107664	0.26028	0.109	0.043	1
Zfp710	0.10809	-0.486934	0.739	0.657	1
Lars2	0.108111	-0.291045	0.497	0.514	1
Ppfia4	0.108995	-0.53608	0.118	0.171	1
Zdhhc21	0.10916	0.293268	0.106	0.043	1
Anks3	0.109182	0.293129	0.188	0.1	1
Ifitm10	0.109272	-0.531925	0.364	0.4	1
Cnnm2	0.109565	0.318047	0.188	0.1	1
Ubr5	0.109743	-0.53969	0.424	0.443	1
Slc25a37	0.110091	-0.463193	0.1	0.157	1
Hps3	0.110599	-0.558175	0.327	0.357	1
Tent5a	0.110775	0.252528	0.13	0.057	1
Bod1l	0.111784	0.290526	0.276	0.157	1
Hnrnpl	0.111789	0.27876	0.303	0.186	1
Kcnq1ot1	0.112312	0.257283	0.479	0.329	1
Gm3764	0.112411	-0.462217	0.291	0.343	1
Hpf1	0.11253	0.281766	0.145	0.071	1
Cyb5r1	0.112667	0.25045	0.106	0.043	1
Stk3	0.112685	0.25845	0.427	0.271	1
Robo1	0.112687	0.31176	0.282	0.171	1
Adcy2	0.112968	-0.581624	0.079	0.129	1
Gmeb1	0.114119	0.278831	0.252	0.143	1
Ddx52	0.114445	-0.371182	0.064	0.114	1
Sema4a	0.114677	-0.664342	0.055	0.1	1
Ywhaq	0.11491	-0.480746	0.167	0.229	1
Snx4	0.115271	0.26054	0.127	0.057	1
Auts2	0.115398	-0.574205	0.509	0.5	1
Acox1	0.116309	0.292086	0.203	0.114	1
Ap1g1	0.116655	0.260128	0.291	0.171	1
B4galt4	0.11671	-0.566578	0.079	0.129	1
Epm2a	0.116973	0.312012	0.145	0.071	1
Tbc1d12	0.117323	0.26531	0.348	0.214	1
Ergic2	0.118264	0.262455	0.167	0.086	1
Zdhhc20	0.118432	-0.497621	0.379	0.4	1
Taf15	0.118974	-0.493487	0.361	0.386	1
Lair1	0.119853	-0.525119	0.448	0.443	1
Capn15	0.12022	0.256698	0.206	0.114	1
St3gal5	0.120577	-0.563483	0.233	0.286	1
Pus10	0.120626	0.267431	0.145	0.071	1
Stag2	0.12078	0.269368	0.379	0.243	1
Pcgf3	0.121434	0.288127	0.124	0.057	1
Fcrls	0.121609	-0.400429	0.736	0.657	1
Cmpk1	0.121934	0.260539	0.124	0.057	1
Ccnl1	0.122444	0.337562	0.555	0.4	1
Brpf3	0.122585	-0.525519	0.067	0.114	1
Pcnx3	0.122766	0.291114	0.103	0.043	1
Atxn10	0.122799	0.312078	0.439	0.3	1
L3mbtl3	0.123053	-0.857346	0.142	0.2	1
Ttll7	0.12319	-0.455367	0.067	0.114	1
Adgrl1	0.123349	-0.57086	0.079	0.129	1
Ankhd1	0.123852	0.251869	0.573	0.386	1
Prkca	0.124101	-0.445369	0.467	0.5	1
Syt16	0.124407	-0.458353	0.067	0.114	1
Zcchc4	0.124422	0.295274	0.103	0.043	1
Prr14	0.124554	-0.426665	0.091	0.143	1
Crim1	0.125061	-0.272445	0.1	0.157	1
Ggta1	0.125216	-0.559279	0.218	0.271	1
Prpf4b	0.125238	-0.319979	0.488	0.5	1
Adcy9	0.126774	0.262196	0.367	0.229	1
Acsl3	0.127232	-0.527415	0.17	0.229	1
Phgdh	0.127694	-0.415453	0.055	0.1	1
Mif	0.127694	-0.360103	0.055	0.1	1
Plxnb2	0.127858	-0.645733	0.248	0.286	1
Sort1	0.128429	-0.486325	0.188	0.243	1
Tecr	0.129123	-0.547852	0.212	0.257	1
Ssr4	0.129691	-0.426736	0.079	0.129	1
Rnpepl1	0.130394	0.264776	0.118	0.057	1
Unc13c	0.131815	-0.402687	0.055	0.1	1
Camkk2	0.132162	0.267681	0.206	0.114	1
Sncaip	0.132322	0.29346	0.236	0.143	1
Clasp2	0.132593	-0.369533	0.612	0.571	1
Rbbp6	0.132966	-0.312492	0.321	0.343	1
Spindoc	0.133552	0.250715	0.103	0.043	1
Rasgrp3	0.134168	0.40045	0.567	0.443	1
Sik2	0.134758	-0.581649	0.315	0.343	1
Ubash3b	0.135357	-0.26927	0.609	0.614	1
Kctd16	0.135719	0.278431	0.142	0.071	1
Arfrp1	0.135785	-0.39865	0.067	0.114	1
Hmg20b	0.136744	0.263206	0.1	0.043	1
Psmd11	0.136778	0.301955	0.158	0.086	1
Atg13	0.137705	0.25659	0.103	0.043	1
Rab14	0.138482	0.288716	0.421	0.286	1
Galnt11	0.138597	0.290288	0.215	0.129	1
Mtus1	0.139136	-0.363136	0.391	0.386	1
Afap1l1	0.140157	0.258276	0.182	0.1	1
Tm6sf1	0.140281	-0.41075	0.23	0.286	1
Zfp655	0.141648	0.26092	0.1	0.043	1
Trim12a	0.142104	0.254034	0.215	0.129	1
Plod3	0.142923	-0.494568	0.094	0.143	1
Cbfb	0.144285	-0.437503	0.233	0.286	1
Rabl6	0.144399	-0.443252	0.218	0.271	1
Usp35	0.144432	0.252946	0.121	0.057	1
Ncl	0.144546	-0.402469	0.115	0.171	1
Itm2b	0.144642	-0.384149	0.609	0.586	1
Mtrex	0.145283	0.255815	0.139	0.071	1
Dtx4	0.146797	-0.498126	0.179	0.229	1
Tsnax	0.146976	-0.344337	0.079	0.129	1
Chsy1	0.147324	-0.454417	0.082	0.129	1
Ctcf	0.147497	0.25223	0.203	0.114	1
Rnft1	0.148309	-0.485026	0.094	0.143	1
Acp2	0.149942	-0.383987	0.091	0.143	1
Nr6a1	0.150319	-0.524092	0.273	0.314	1
Gm12940	0.150721	-0.397343	0.058	0.1	1
Pomp	0.1511	-0.563042	0.058	0.1	1
Trim36	0.1511	-0.460055	0.058	0.1	1
Prrc2c	0.15134	-0.312366	0.473	0.457	1
Stk24	0.155679	0.288622	0.194	0.114	1
Bcl9l	0.157041	-0.460361	0.097	0.143	1
Fbxl7	0.158427	-0.623625	0.07	0.114	1
Lyzl4	0.158652	0.272757	0.176	0.1	1
Slc39a12	0.159153	-0.43689	0.07	0.114	1
Usp19	0.159765	-0.48593	0.182	0.229	1
Ephb1	0.159946	-0.382333	0.121	0.171	1
Brip1os	0.160755	-0.545273	0.182	0.229	1
Tut4	0.161693	-0.411044	0.406	0.429	1
Rpl41	0.161899	0.257587	0.121	0.057	1
Sh2d3c	0.16262	-0.587889	0.082	0.129	1
Rlim	0.163448	-0.500801	0.121	0.171	1
Farp2	0.163561	-0.407063	0.07	0.114	1
Sorcs3	0.163608	-0.422058	0.058	0.1	1
Cd47	0.165411	-0.497258	0.167	0.214	1
Ubac2	0.167608	-0.463287	0.285	0.314	1
Ak2	0.169267	-0.475605	0.085	0.129	1
Rbks	0.169795	-0.566704	0.109	0.157	1
Stimate	0.17067	-0.581605	0.061	0.1	1
Nod1	0.171488	-0.471305	0.061	0.1	1
Adgrb2	0.172309	-0.436054	0.061	0.1	1
Aco1	0.172646	-0.549284	0.097	0.143	1
Arl6ip4	0.173961	-0.442495	0.061	0.1	1
Scn1a	0.175179	-0.273621	0.058	0.1	1
Arhgap15	0.175541	-0.69321	0.121	0.171	1
Pbdc1	0.175624	-0.395025	0.061	0.1	1
Proser1	0.175763	-0.337828	0.07	0.114	1
Dgcr8	0.177934	-0.519607	0.112	0.157	1
Tbca	0.178584	0.257606	0.13	0.071	1
Gm16337	0.17883	-0.409754	0.109	0.157	1
1700047M11Rik	0.178954	-0.393013	0.073	0.114	1
Dscaml1	0.178986	-0.472351	0.061	0.1	1
Nubpl	0.179099	0.278348	0.109	0.057	1
Rhoa	0.179506	-0.506438	0.291	0.314	1
Odf2l	0.180811	0.292791	0.127	0.071	1
Map3k3	0.180968	-0.306199	0.47	0.457	1
Dnaja1	0.181695	-0.425459	0.082	0.129	1
Sall1	0.183642	-0.737041	0.233	0.271	1
Rplp1	0.185927	-0.463976	0.17	0.214	1
Pdgfb	0.186067	-0.434915	0.088	0.129	1
Lysmd4	0.186785	-0.445401	0.348	0.371	1
Pafah1b2	0.187052	-0.499135	0.127	0.171	1
Dagla	0.189359	-0.458284	0.061	0.1	1
Rab6b	0.189587	-0.332694	0.109	0.157	1
Arv1	0.19113	-0.316434	0.061	0.1	1
Trpm3	0.191853	-0.802558	0.479	0.486	1
Il10ra	0.194746	-0.516054	0.342	0.357	1
Plxna2	0.194791	-0.50124	0.076	0.114	1
Cacna1b	0.196516	-0.294813	0.061	0.1	1
Pcsk1n	0.196789	-0.512343	0.073	0.114	1
Gramd1a	0.197119	-0.443454	0.23	0.271	1
Sertad2	0.197516	-0.527729	0.112	0.157	1
Akna	0.19843	-0.397855	0.1	0.143	1
Fgf14	0.198626	-0.536456	0.436	0.429	1
Rps20	0.199831	-0.26789	0.088	0.129	1
Ythdc2	0.199945	-0.43877	0.124	0.171	1
Slc4a7	0.2001	-0.422599	0.191	0.229	1
Tapbp	0.20034	-0.355275	0.085	0.129	1
Cops5	0.202989	-0.499339	0.088	0.129	1
Cct2	0.203132	-0.510033	0.076	0.114	1
Gls	0.203391	-0.369381	0.397	0.414	1
Commd1	0.204371	0.270491	0.109	0.057	1
Timmdc1	0.205313	-0.353158	0.073	0.114	1
Lrch3	0.205697	-0.419313	0.364	0.371	1
Prr14l	0.205853	0.309708	0.439	0.3	1
Rab24	0.206136	-0.437977	0.142	0.186	1
Dlc1	0.207202	-0.653135	0.242	0.271	1
Gpr158	0.208073	-0.287198	0.109	0.157	1
Csad	0.208131	-0.348357	0.309	0.343	1
Bin1	0.208174	-0.312812	0.706	0.643	1
Rpl7a	0.208279	-0.456286	0.064	0.1	1
Acbd6	0.211166	-0.537176	0.127	0.171	1
Basp1	0.212923	-0.523041	0.345	0.357	1
Copz1	0.213535	-0.44944	0.091	0.129	1
Gpc6	0.216599	-0.640793	0.212	0.243	1
Dpy19l1	0.21673	-0.423889	0.103	0.143	1
Xpo6	0.216951	-0.443596	0.197	0.229	1
Ndrg4	0.217633	-0.453094	0.091	0.129	1
Tspan5	0.217895	-0.573068	0.191	0.229	1
Itpr2	0.218443	-0.314002	0.494	0.471	1
Iffo1	0.218953	-0.401113	0.188	0.229	1
Abi2	0.219048	-0.344162	0.158	0.2	1
Usp24	0.219189	-0.420556	0.427	0.414	1
C1galt1	0.21966	-0.374732	0.064	0.1	1
Tspan7	0.220625	-0.530681	0.303	0.329	1
Nucb1	0.220628	-0.384608	0.064	0.1	1
Cntn1	0.220933	-0.680639	0.185	0.229	1
Fyn	0.22096	-0.352561	0.248	0.157	1
Zranb1	0.221675	-0.498284	0.203	0.243	1
Stambpl1	0.222801	-0.449777	0.145	0.186	1
Mkln1	0.223212	-0.321758	0.582	0.529	1
0610030E20Rik	0.224203	-0.454673	0.076	0.114	1
Tyw1	0.226857	-0.306093	0.073	0.114	1
Sh3tc1	0.227491	-0.35719	0.064	0.1	1
Fmnl1	0.227632	-0.62714	0.118	0.157	1
Bclaf1	0.2281	-0.278568	0.464	0.443	1
Rnps1	0.228443	-0.50668	0.106	0.143	1
Denr	0.22963	-0.458454	0.079	0.114	1
Lims1	0.230333	-0.451421	0.439	0.429	1
Npnt	0.230431	-0.380134	0.088	0.129	1
Hsp90ab1	0.231076	-0.345692	0.276	0.3	1
Zdhhc6	0.231092	-0.369943	0.103	0.143	1
Pik3cd	0.23248	0.274491	0.561	0.4	1
Ccdc91	0.232485	-0.327754	0.064	0.1	1
Spag9	0.233086	-0.365586	0.488	0.471	1
Dtna	0.233513	-0.41229	0.239	0.271	1
Gcn1	0.233793	-0.468313	0.233	0.257	1
Phlpp1	0.234184	-0.479793	0.264	0.3	1
Gm26871	0.234385	0.31103	0.161	0.1	1
Gsdme	0.235306	-0.431783	0.076	0.114	1
Chp1	0.235306	-0.462631	0.076	0.114	1
Srrm1	0.237303	-0.465091	0.421	0.414	1
Pcyt2	0.237831	-0.376112	0.264	0.286	1
Son	0.241349	-0.290874	0.785	0.729	1
Cox5a	0.241628	-0.426552	0.091	0.129	1
Malt1	0.242119	-0.344177	0.179	0.214	1
Man2c1os	0.242518	-0.425397	0.091	0.129	1
Afdn	0.242518	-0.40431	0.091	0.129	1
Kctd13	0.24265	-0.619544	0.067	0.1	1
P2ry6	0.242739	-0.331238	0.47	0.443	1
Cul4b	0.243746	-0.364466	0.064	0.1	1
Ammecr1l	0.244414	-0.434532	0.103	0.143	1
Stmn1	0.244561	-0.43556	0.079	0.114	1
Cd86	0.244809	0.251111	0.503	0.4	1
Kif13a	0.245059	-0.290809	0.339	0.371	1
Dusp12	0.245719	-0.479506	0.106	0.143	1
Kcnrg	0.247003	-0.357765	0.091	0.129	1
Copb1	0.24788	-0.27835	0.173	0.214	1
Abcd1	0.247907	-0.368726	0.091	0.129	1
Dcaf1	0.249111	-0.504333	0.106	0.143	1
Rab4b	0.24987	-0.379438	0.067	0.1	1
Nlrp3	0.250047	-0.289248	0.064	0.1	1
Ctdspl	0.250146	-0.469532	0.121	0.157	1
Atr	0.251143	-0.446226	0.148	0.186	1
Gm15489	0.252109	-0.443926	0.255	0.286	1
Ptpro	0.252287	-0.525755	0.23	0.257	1
Atrnl1	0.253389	-0.525026	0.148	0.186	1
Gdi2	0.254261	-0.259776	0.458	0.443	1
Cmtm6	0.254658	-0.466146	0.094	0.129	1
Ctsh	0.255064	-0.397726	0.152	0.186	1
Mtpap	0.258175	-0.361948	0.079	0.114	1
Fhit	0.2583	-0.512173	0.327	0.343	1
Tmem176b	0.262592	-0.413384	0.067	0.1	1
Csnk2a1	0.262779	-0.282648	0.273	0.171	1
Atp13a3	0.263719	-0.480654	0.236	0.257	1
Slc6a1	0.26389	-0.446599	0.094	0.129	1
Cp	0.265764	-0.617023	0.094	0.129	1
Arhgef28	0.265842	-0.463144	0.067	0.1	1
Dlg1	0.266083	-0.316188	0.373	0.386	1
Tmed5	0.266294	-0.254009	0.064	0.1	1
Med12l	0.266688	-0.554562	0.297	0.314	1
Cdh13	0.266704	-0.587265	0.094	0.129	1
Zfp827	0.270617	-0.442617	0.179	0.214	1
Crebbp	0.270881	-0.324201	0.591	0.543	1
Sipa1l1	0.271709	-0.568479	0.312	0.329	1
Nipsnap2	0.272468	-0.469776	0.182	0.214	1
Tcerg1	0.273866	-0.468598	0.188	0.214	1
Cyld	0.277496	-0.37123	0.276	0.286	1
Ankra2	0.277616	-0.542326	0.082	0.114	1
Rps6ka2	0.277992	-0.38772	0.067	0.1	1
Cbx3	0.278645	-0.446343	0.082	0.114	1
Ptprd	0.27974	-0.273218	0.764	0.671	1
Ptprm	0.280945	-0.461678	0.291	0.314	1
Atp6v0a2	0.281803	-0.671298	0.167	0.2	1
Ncor1	0.282569	-0.34029	0.57	0.514	1
Atxn7	0.28345	-0.273731	0.382	0.386	1
Tafa2	0.284875	-0.476413	0.082	0.114	1
Tgfb1	0.285247	-0.47799	0.233	0.257	1
Gsdmd	0.28698	-0.380776	0.094	0.129	1
Ttc9c	0.287222	-0.60087	0.07	0.1	1
Creb1	0.287506	-0.385805	0.273	0.3	1
Cacna1e	0.287585	-0.414993	0.124	0.157	1
Gm3488	0.287875	-0.457236	0.097	0.129	1
Elk4	0.287971	-0.407501	0.094	0.129	1
Fbxo11	0.289398	-0.28549	0.464	0.457	1
Plekhg5	0.290766	-0.361383	0.182	0.214	1
Gm39469	0.291197	-0.34541	0.082	0.114	1
Sdf2	0.292022	-0.472259	0.124	0.157	1
Elmo2	0.29236	-0.466116	0.139	0.171	1
Arel1	0.293133	-0.458461	0.112	0.143	1
Psd4	0.293996	-0.312932	0.067	0.1	1
D930016D06Rik	0.294049	-0.372476	0.07	0.1	1
Ptov1	0.294298	-0.469171	0.097	0.129	1
Abi3	0.294912	-0.44638	0.197	0.229	1
Lhfp	0.295197	-0.541365	0.07	0.1	1
Mir142hg	0.295895	-0.461385	0.273	0.286	1
Selenot	0.296348	-0.341149	0.07	0.1	1
Rps10	0.297427	-0.474729	0.121	0.157	1
Lingo2	0.298648	-0.280354	0.415	0.386	1
Capn3	0.298737	-0.431243	0.148	0.186	1
Lpcat3	0.299771	-0.519767	0.239	0.257	1
Nol8	0.299773	-0.315461	0.082	0.114	1
Stxbp1	0.302596	-0.480405	0.094	0.129	1
Jam3	0.304491	-0.373678	0.07	0.1	1
Arhgap30	0.305644	-0.315297	0.355	0.371	1
Daglb	0.306508	-0.436525	0.318	0.314	1
Khnyn	0.306918	-0.370576	0.097	0.129	1
Fam149b	0.307376	-0.394313	0.112	0.143	1
Zfp141	0.307414	-0.328627	0.082	0.114	1
Cmtm7	0.308321	-0.506023	0.303	0.329	1
Bptf	0.30843	-0.40764	0.442	0.429	1
Rps6ka5	0.30893	-0.392266	0.215	0.243	1
Tmem41b	0.30962	-0.398442	0.082	0.114	1
Tab2	0.310593	-0.358003	0.427	0.4	1
Trappc11	0.311737	-0.490598	0.112	0.143	1
Taf1	0.312818	-0.331895	0.148	0.186	1
Chst11	0.313491	-0.303808	0.094	0.129	1
Eef1a1	0.316384	-0.389439	0.303	0.3	1
Garnl3	0.316385	-0.41056	0.161	0.186	1
Hck	0.317088	-0.523019	0.227	0.243	1
Gpkow	0.320004	-0.322677	0.07	0.1	1
Vav3	0.323655	-0.250822	0.155	0.1	1
Coro2a	0.323656	-0.402217	0.07	0.1	1
Tmed10	0.323802	-0.497487	0.145	0.171	1
Ptprn	0.325492	-0.294723	0.07	0.1	1
Gm15764	0.325871	-0.394466	0.085	0.114	1
Acvr1	0.325934	-0.372667	0.221	0.243	1
Fbrsl1	0.327987	-0.450633	0.255	0.271	1
Mpp6	0.328068	-0.473315	0.142	0.171	1
Ncbp3	0.328222	-0.336415	0.148	0.186	1
Tubb4a	0.328568	-0.295167	0.07	0.1	1
Afg3l1	0.329897	-0.353401	0.142	0.171	1
Pde7b	0.330117	-0.320825	0.152	0.186	1
Ttc13	0.330257	-0.383208	0.127	0.157	1
Shld1	0.33111	-0.26911	0.109	0.143	1
Ggt5	0.332283	-0.279851	0.07	0.1	1
Bin2	0.333173	-0.396206	0.176	0.2	1
Tenm4	0.333183	-0.25399	0.161	0.2	1
Ubqln1	0.333218	-0.312011	0.097	0.129	1
Rabac1	0.335259	-0.451195	0.073	0.1	1
Patz1	0.335259	-0.659286	0.073	0.1	1
Gpr108	0.335259	-0.36344	0.073	0.1	1
Cd164	0.336912	-0.292329	0.082	0.114	1
Rps24	0.338254	0.261855	0.118	0.071	1
Herpud1	0.339794	-0.3695	0.07	0.1	1
Spock2	0.341452	-0.347137	0.073	0.1	1
Zfp804b	0.343949	-0.58307	0.073	0.1	1
Tmem33	0.343949	-0.352775	0.073	0.1	1
Sppl3	0.344722	-0.365988	0.397	0.386	1
Cacna2d1	0.345002	-0.494302	0.155	0.186	1
Ergic1	0.345834	-0.57954	0.145	0.171	1
Atp1a3	0.346606	-0.372597	0.085	0.114	1
Gna15	0.347432	-0.410464	0.264	0.271	1
Pcif1	0.347802	-0.47502	0.103	0.129	1
4833420G17Rik	0.348106	-0.536941	0.158	0.186	1
Arap3	0.348201	-0.376257	0.155	0.186	1
Mfap3	0.348727	-0.341497	0.188	0.214	1
Suclg1	0.348979	-0.389127	0.073	0.1	1
Pdlim4	0.348979	-0.340067	0.073	0.1	1
Vkorc1l1	0.349677	-0.408479	0.097	0.129	1
Adam15	0.351195	-0.298363	0.191	0.214	1
Slc4a4	0.351372	-0.273649	0.23	0.257	1
Rapgef1	0.351909	-0.476557	0.367	0.343	1
Desi1	0.352511	-0.451243	0.085	0.114	1
A230057D06Rik	0.35254	-0.490428	0.215	0.229	1
Il1rap	0.354056	-0.311979	0.073	0.1	1
Hspa14	0.356085	-0.369629	0.085	0.114	1
Pip4p1	0.356477	-0.307607	0.303	0.3	1
Tmem44	0.357673	-0.553388	0.13	0.157	1
Ndufaf7	0.358482	-0.474361	0.088	0.114	1
Clcn3	0.358831	-0.544044	0.264	0.271	1
Lamtor1	0.362049	-0.462217	0.088	0.114	1
Ccdc88b	0.362134	-0.366694	0.1	0.129	1
Cept1	0.362779	-0.44487	0.348	0.329	1
Xbp1	0.363243	-0.467278	0.088	0.114	1
Psme4	0.365108	-0.366658	0.461	0.414	1
Ndufs1	0.365207	-0.371099	0.158	0.186	1
Dpysl2	0.365235	-0.336584	0.315	0.329	1
Rad21	0.365638	-0.496851	0.088	0.114	1
Cnbp	0.366479	-0.266558	0.127	0.157	1
Gle1	0.366942	-0.332082	0.085	0.114	1
Eif2ak3	0.368234	-0.365502	0.161	0.186	1
Ubtf	0.369383	-0.256746	0.085	0.114	1
Golm1	0.370061	-0.40868	0.203	0.214	1
Agfg2	0.370458	-0.333257	0.088	0.114	1
Rps15	0.372364	-0.285799	0.1	0.129	1
Kcnk6	0.374582	-0.40785	0.076	0.1	1
Nfasc	0.374734	-0.370722	0.358	0.357	1
Smc4	0.374825	-0.301983	0.073	0.1	1
Fmnl3	0.375591	-0.370916	0.264	0.286	1
Aif1	0.376968	-0.344701	0.1	0.129	1
Strn3	0.378346	-0.361764	0.57	0.471	1
Pard3	0.378802	-0.544185	0.073	0.1	1
Krcc1	0.37911	-0.263033	0.176	0.114	1
6720427I07Rik	0.379601	-0.450655	0.088	0.114	1
Mid1	0.381467	-0.252742	0.073	0.1	1
Phf12	0.381645	-0.366959	0.233	0.257	1
H2-Ke6	0.382804	-0.334023	0.073	0.1	1
Samd12	0.384523	-0.281594	0.1	0.129	1
Stk10	0.385315	-0.502107	0.173	0.2	1
Slc25a45	0.386005	-0.37677	0.103	0.129	1
2610020C07Rik	0.387458	-0.398822	0.13	0.157	1
Ppwd1	0.387636	-0.304757	0.088	0.114	1
Ilf2	0.387787	-0.357884	0.091	0.114	1
Atat1	0.388511	-0.39629	0.13	0.157	1
Bicd1	0.388881	-0.312721	0.088	0.114	1
Bsg	0.389495	-0.316405	0.103	0.129	1
Ttc39b	0.391379	-0.352092	0.088	0.114	1
Eapp	0.393068	-0.313877	0.085	0.114	1
Pard3b	0.393101	-0.251522	0.288	0.314	1
Spast	0.393102	-0.358152	0.161	0.186	1
Cables1	0.393297	-0.635977	0.2	0.214	1
Emsy	0.394613	-0.489563	0.221	0.229	1
Ndfip1	0.394641	-0.335897	0.297	0.3	1
Dcaf17	0.397945	-0.33837	0.227	0.243	1
Gm50035	0.398808	-0.441965	0.242	0.257	1
March2	0.398894	-0.464154	0.103	0.129	1
Cfap20	0.400509	-0.476064	0.1	0.129	1
Prkag1	0.401265	-0.334853	0.103	0.129	1
Phf6	0.403201	-0.329886	0.073	0.1	1
Naaladl2	0.404451	-0.450312	0.133	0.157	1
Ppp6r1	0.404601	-0.402689	0.091	0.114	1
Ppib	0.405253	-0.367701	0.076	0.1	1
Vdac3	0.40657	-0.279426	0.088	0.114	1
Fmn2	0.409629	-0.442028	0.103	0.129	1
Rps4x	0.413488	-0.504838	0.091	0.114	1
Mcm3ap	0.413494	-0.284074	0.076	0.1	1
Zfr	0.414877	-0.31039	0.485	0.429	1
Rasa2	0.415182	-0.252648	0.191	0.129	1
Med17	0.418097	-0.311027	0.103	0.129	1
Ntan1	0.418605	-0.514009	0.106	0.129	1
4930444A19Rik	0.418637	-0.349521	0.167	0.186	1
Dhx30	0.42492	-0.458827	0.17	0.186	1
Slc35c2	0.425104	-0.272348	0.115	0.143	1
Itpr1	0.425776	-0.463305	0.118	0.143	1
Ampd3	0.426041	-0.256959	0.076	0.1	1
Map4	0.43267	-0.283921	0.421	0.4	1
Plcb2	0.432917	-0.340438	0.091	0.114	1
Coro2b	0.433248	-0.441651	0.079	0.1	1
Vasp	0.433248	-0.29215	0.079	0.1	1
Med15	0.433786	-0.359001	0.218	0.229	1
C130071C03Rik	0.436915	-0.306218	0.106	0.129	1
Dmtf1	0.438101	-0.283323	0.294	0.286	1
Cep152	0.438393	-0.324626	0.109	0.129	1
Ptn	0.440196	-0.527453	0.294	0.286	1
Magi2	0.441225	-0.409995	0.482	0.429	1
Dpm1	0.441439	-0.341062	0.185	0.2	1
Lpar6	0.442571	-0.320848	0.148	0.171	1
Sfswap	0.443681	-0.306326	0.3	0.3	1
Araf	0.443891	-0.378661	0.155	0.171	1
Dip2b	0.444083	-0.253966	0.83	0.7	1
Lnpep	0.444453	-0.347061	0.294	0.3	1
Acvr2a	0.444591	-0.299323	0.118	0.143	1
Daam1	0.44462	-0.379133	0.191	0.214	1
Tnr	0.445568	-0.355746	0.239	0.243	1
Ppp4r3b	0.445644	-0.336537	0.233	0.243	1
Pdia6	0.446634	-0.259714	0.103	0.129	1
Nos1ap	0.446811	-0.360486	0.17	0.186	1
Hnrnpr	0.446929	-0.402037	0.239	0.243	1
Tg	0.448264	-0.317633	0.109	0.129	1
Ncam1	0.451821	-0.475134	0.355	0.329	1
Plcb1	0.453527	-0.316734	0.361	0.343	1
Tmed9	0.459485	-0.318348	0.106	0.129	1
Ddb1	0.459485	-0.265389	0.106	0.129	1
1700028E10Rik	0.460319	-0.394317	0.079	0.1	1
Fam193b	0.461652	-0.363608	0.209	0.214	1
Rbm4	0.462166	-0.385588	0.094	0.114	1
Acsl4	0.462369	-0.468276	0.139	0.157	1
Ptprg	0.463445	-0.459534	0.197	0.214	1
Srgap3	0.46351	-0.462898	0.139	0.157	1
Rmnd5a	0.463896	-0.362869	0.188	0.2	1
Pde4b	0.465183	-0.541131	0.515	0.457	1
Arhgef12	0.465781	-0.385395	0.315	0.3	1
Tmem208	0.466584	-0.272153	0.121	0.143	1
Arhgap26	0.472253	-0.363792	0.136	0.157	1
Cit	0.474939	-0.315206	0.079	0.1	1
Supt5	0.476166	-0.31642	0.139	0.157	1
Gria3	0.476454	-0.281855	0.145	0.1	1
Dab1	0.477783	-0.253478	0.273	0.2	1
Sf1	0.479913	-0.332662	0.173	0.186	1
Rnf138	0.480124	-0.369299	0.124	0.143	1
Sf3b1	0.48043	-0.260283	0.606	0.543	1
Sccpdh	0.483832	-0.252299	0.079	0.1	1
Kdm4c	0.483903	-0.368748	0.312	0.3	1
Slco1c1	0.483988	-0.347892	0.094	0.114	1
Nlrp1b	0.484198	-0.311204	0.173	0.186	1
Stub1	0.486159	-0.437448	0.158	0.171	1
Pou2f2	0.486206	-0.268073	0.445	0.414	1
Apex2	0.486385	-0.339795	0.109	0.129	1
Rbm26	0.489304	-0.42944	0.539	0.457	1
Fastk	0.490515	-0.317946	0.082	0.1	1
Fam117b	0.491901	-0.445038	0.27	0.271	1
Sdk1	0.49197	-0.677515	0.409	0.371	1
Cds1	0.495099	-0.285039	0.152	0.171	1
1810013L24Rik	0.4975	-0.343197	0.142	0.157	1
Gpc5	0.498209	-0.495081	0.479	0.429	1
Tex2	0.49904	-0.305977	0.112	0.129	1
Usp16	0.499116	-0.344014	0.155	0.171	1
Kcnq5	0.49992	-0.318048	0.233	0.171	1
Calr	0.501284	-0.457757	0.176	0.186	1
Rpl18	0.502435	-0.333865	0.082	0.1	1
Tubb2a	0.502962	-0.29209	0.112	0.129	1
Rasal3	0.50648	-0.518394	0.158	0.171	1
Camk1	0.507981	-0.259451	0.388	0.371	1
Map11	0.508216	-0.291581	0.112	0.129	1
Ywhab	0.50977	-0.462871	0.097	0.114	1
Cep170	0.510584	-0.296982	0.361	0.343	1
Robo2	0.51096	-0.356462	0.127	0.143	1
Stxbp5l	0.511175	-0.413912	0.097	0.114	1
Kcnd2	0.511374	-0.33315	0.491	0.443	1
Mon2	0.513283	-0.276057	0.448	0.4	1
Myt1l	0.513809	-0.3146	0.182	0.2	1
Cdc37l1	0.517225	-0.376496	0.315	0.3	1
Sh3bp1	0.517241	-0.414941	0.127	0.143	1
Rabgef1	0.517546	-0.318093	0.082	0.1	1
Myef2	0.517775	-0.375095	0.145	0.157	1
Abcf1	0.518692	-0.316872	0.155	0.171	1
Myl6	0.518788	-0.25826	0.124	0.143	1
Polr2a	0.51902	-0.325648	0.176	0.129	1
Dnajc18	0.520062	-0.288971	0.124	0.143	1
Lemd3	0.522294	-0.296383	0.127	0.143	1
[truncated: 349 more rows]

## Sheet: Homeostatic Microglia
gene	p_val	avg_log2FC	pct.1	pct.2	p_val_adj
Malat1	2.80632e-35	-0.385377	1	1	6.93807e-31
Cst3	8.53215e-24	-0.764054	0.858	0.96	2.1094e-19
mt-Co3	3.09254e-13	-1.2036	0.162	0.368	7.64569e-09
mt-Atp6	3.76228e-13	-1.20013	0.106	0.295	9.30149e-09
Mbp	1.22447e-12	-0.656396	0.573	0.702	3.02726e-08
Pcdh9	1.61816e-09	-0.425896	0.896	0.927	4.00058e-05
mt-Co2	9.30391e-09	-0.883867	0.108	0.252	0.000230021
Plp1	1.74302e-08	-0.549456	0.575	0.672	0.000430926
Anapc15	4.50938e-08	0.811947	0.183	0.046	0.00111485
Mrc1	8.94494e-08	1.05974	0.221	0.076	0.00221146
Numb	1.10066e-07	-0.389074	0.865	0.881	0.00272117
Ccnd3	1.70038e-07	-0.539206	0.692	0.755	0.00420384
mt-Cytb	7.49787e-07	-0.719747	0.046	0.142	0.018537
Hexb	1.22355e-06	-0.297527	0.956	0.957	0.0302498
Maml3	3.29823e-06	0.295842	0.96	0.868	0.0815423
Tmeff2	4.83315e-06	-0.38937	0.683	0.748	0.11949
mt-Nd4	5.6927e-06	-0.781169	0.054	0.146	0.140741
Lactb2	6.37961e-06	0.591012	0.162	0.053	0.157723
Nkain2	7.92596e-06	-0.390634	0.756	0.772	0.195953
Gm26917	8.88487e-06	0.459621	0.665	0.48	0.219661
Cabin1	1.46148e-05	0.493537	0.192	0.073	0.361322
Ogdh	2.31417e-05	0.492757	0.25	0.116	0.572131
Gatad2a	3.40906e-05	0.517003	0.173	0.066	0.842823
Secisbp2	3.5703e-05	0.493188	0.196	0.079	0.882686
9630013A20Rik	4.75231e-05	-0.6159	0.267	0.374	1
Fli1	5.26927e-05	0.402058	0.796	0.679	1
Kcnq1ot1	5.95185e-05	0.485806	0.323	0.179	1
Sptlc2	6.9148e-05	0.444128	0.271	0.136	1
Fcho2	7.71512e-05	0.439493	0.54	0.374	1
Fchsd2	7.72043e-05	0.254396	0.946	0.868	1
Mobp	0.000137813	-0.577886	0.396	0.457	1
Fkbp5	0.000144546	-0.534915	0.296	0.391	1
Pan3	0.000153557	0.385209	0.633	0.48	1
Tnfrsf11a	0.00016028	0.48319	0.385	0.242	1
Tgfbr1	0.000200312	-0.289108	0.877	0.877	1
Cbfa2t3	0.000216486	0.431851	0.144	0.056	1
Snx6	0.000221472	0.379651	0.435	0.278	1
Ets1	0.000232767	-0.530406	0.154	0.248	1
Ints4	0.000244192	0.378896	0.108	0.033	1
Trem2	0.000267747	-0.453325	0.312	0.387	1
Runx1	0.000275905	0.373595	0.719	0.579	1
2510009E07Rik	0.000316451	0.464433	0.231	0.119	1
Vac14	0.000322522	0.393073	0.106	0.033	1
Erbb4	0.000331916	-0.390832	0.571	0.613	1
Ripor2	0.000333248	0.52462	0.154	0.066	1
Phtf2	0.00035594	0.476335	0.165	0.073	1
Pvt1	0.000367242	0.430416	0.194	0.093	1
mt-Co1	0.000373327	-0.660424	0.135	0.219	1
Tbc1d9	0.000424306	0.481484	0.404	0.265	1
Arsb	0.000432723	0.39994	0.681	0.533	1
Cmip	0.000465798	0.347784	0.592	0.411	1
Nav1	0.000479495	0.394645	0.279	0.156	1
Eif2ak2	0.000533449	0.414635	0.138	0.056	1
Ptgds	0.000546925	-0.558893	0.127	0.205	1
Reep3	0.000582524	0.346898	0.206	0.103	1
Snx9	0.000592951	0.396379	0.233	0.126	1
Selenop	0.000626521	0.333828	0.215	0.109	1
Adcy7	0.000667558	0.394681	0.392	0.255	1
Ecpas	0.000701663	0.353252	0.39	0.238	1
Rfwd3	0.000721645	0.340188	0.127	0.05	1
Kansl3	0.000735945	0.366813	0.131	0.053	1
Slc9a1	0.000745765	0.327539	0.167	0.076	1
Abr	0.000776623	0.378481	0.367	0.225	1
Rnf41	0.000790343	0.344206	0.135	0.056	1
Gm46367	0.000840509	-0.494351	0.404	0.454	1
Sfmbt1	0.000846007	0.345077	0.444	0.298	1
Lrpprc	0.000847931	0.450764	0.202	0.106	1
Arid1b	0.000909436	0.35859	0.617	0.464	1
C1qa	0.000922371	-0.413238	0.606	0.606	1
Sytl2	0.000965855	-0.545711	0.102	0.175	1
Gm19951	0.000967456	0.401329	0.148	0.066	1
Kmt2e	0.000976383	0.346221	0.537	0.368	1
Neat1	0.000994862	0.370332	0.129	0.053	1
Extl3	0.00100082	0.30464	0.406	0.268	1
Xylt1	0.00101478	0.446629	0.131	0.056	1
Pds5b	0.00101705	0.437884	0.254	0.149	1
Dip2c	0.00102125	0.32104	0.462	0.311	1
Prkcb	0.00103377	0.338256	0.544	0.381	1
Kdm4a	0.00104464	0.352733	0.129	0.053	1
AU020206	0.00105497	0.304774	0.112	0.043	1
Immp2l	0.00105535	0.415644	0.306	0.189	1
Arhgap25	0.00115077	0.331675	0.425	0.272	1
Fkbp15	0.00115157	0.325139	0.362	0.225	1
Cacna1a	0.001172	0.387635	0.265	0.152	1
Fbxw4	0.00117702	0.361137	0.317	0.192	1
Myo5a	0.00117716	0.413633	0.198	0.103	1
Ctsb	0.00130659	0.328591	0.354	0.225	1
Zdhhc14	0.0013099	0.334931	0.66	0.507	1
Blnk	0.0013128	0.43329	0.46	0.321	1
Dab2	0.00133227	0.398165	0.14	0.063	1
Sbf2	0.00133743	0.388009	0.558	0.417	1
Slc29a3	0.00133807	0.375696	0.252	0.142	1
St13	0.00136333	0.28384	0.175	0.086	1
Plekhm3	0.00140034	0.302154	0.206	0.106	1
Mtr	0.00142194	0.381996	0.306	0.192	1
Pnpt1	0.00149884	0.300243	0.11	0.043	1
Vps13c	0.00150064	0.448442	0.24	0.136	1
Dennd1a	0.00152453	0.370981	0.558	0.414	1
St3gal4	0.0016212	0.454235	0.21	0.116	1
Renbp	0.00163317	0.350143	0.115	0.046	1
Bckdha	0.00165191	0.371116	0.148	0.07	1
Slc38a6	0.00167803	0.436713	0.244	0.146	1
Epsti1	0.00170548	0.389668	0.169	0.086	1
Map3k14	0.00170776	0.379457	0.24	0.139	1
Znrf3	0.00172533	0.394059	0.204	0.109	1
Slc8a1	0.00173361	0.252876	0.929	0.854	1
Gm13710	0.00184754	0.367211	0.296	0.182	1
Ccl25	0.0018897	0.327632	0.102	0.04	1
Hps5	0.00190428	0.355121	0.108	0.043	1
Btaf1	0.00192065	0.264526	0.412	0.265	1
Mtf2	0.00193808	0.370913	0.188	0.099	1
Msh3	0.00194504	0.359434	0.123	0.053	1
Snx24	0.00196388	0.335294	0.479	0.344	1
Gpr137b	0.00201193	0.33242	0.142	0.066	1
Wdfy4	0.00206187	0.335211	0.34	0.219	1
Hpcal1	0.00209261	0.341172	0.112	0.046	1
Nrp1	0.00210273	0.381576	0.456	0.321	1
Dock1	0.0021267	0.309125	0.462	0.308	1
Gpr160	0.00213028	0.360169	0.112	0.046	1
Csde1	0.00214387	0.389805	0.302	0.182	1
Tmed10	0.00227184	0.30268	0.167	0.083	1
Gramd1b	0.00229134	0.269717	0.16	0.079	1
Foxp1	0.00229979	0.32169	0.61	0.46	1
Rnf130	0.00231689	0.308304	0.41	0.265	1
Ppp1r37	0.00232813	0.304811	0.112	0.046	1
Notch2	0.00235334	0.335417	0.267	0.156	1
Luzp1	0.00242632	0.299507	0.175	0.093	1
Ppfia1	0.00243435	0.36445	0.185	0.099	1
Mrps9	0.00246735	0.37541	0.119	0.053	1
Slc24a2	0.00248366	-0.418549	0.267	0.341	1
Plekhm2	0.00250355	0.287892	0.256	0.149	1
Stx6	0.00252882	0.329627	0.144	0.07	1
Lrch3	0.00256721	0.360145	0.381	0.248	1
R3hcc1l	0.00257908	0.259551	0.16	0.079	1
Myo7a	0.00261911	0.315466	0.106	0.043	1
Abl2	0.00265226	0.342882	0.294	0.182	1
Cd81	0.00268605	-0.322593	0.325	0.387	1
Gm20732	0.00272872	0.307294	0.131	0.06	1
Auh	0.00273231	0.305198	0.175	0.093	1
Dpp10	0.00275609	0.420959	0.506	0.381	1
Dnajc13	0.0027838	0.314062	0.396	0.258	1
Ggta1	0.00279215	0.362874	0.271	0.166	1
Rnf166	0.00280105	0.299308	0.179	0.093	1
Parn	0.00281078	0.278719	0.179	0.093	1
Ctcf	0.00287135	0.372329	0.212	0.119	1
Unk	0.00288397	0.336324	0.19	0.103	1
Mau2	0.00291518	0.352372	0.238	0.139	1
Tasor2	0.00295135	0.410169	0.215	0.126	1
Rbms1	0.00296253	0.33523	0.181	0.096	1
Mrtfa	0.00300695	0.334018	0.31	0.202	1
Gna12	0.00306228	0.321428	0.423	0.295	1
Nop56	0.00306993	0.340736	0.115	0.05	1
Abhd12	0.00317718	0.323839	0.654	0.497	1
Nfxl1	0.00318227	0.358644	0.192	0.109	1
Rif1	0.00320513	0.299962	0.173	0.089	1
Ranbp9	0.00320871	0.316387	0.312	0.195	1
Cux1	0.00329631	0.302463	0.646	0.49	1
Tpd52	0.00330717	0.342756	0.177	0.096	1
Fam91a1	0.00332659	0.401484	0.317	0.202	1
Nr6a1	0.00348007	-0.52637	0.356	0.404	1
Abca1	0.00353184	0.391455	0.577	0.457	1
Pign	0.00354179	0.280777	0.183	0.099	1
Arcn1	0.00357117	0.299817	0.158	0.083	1
Api5	0.00363162	0.329569	0.108	0.046	1
Nktr	0.00364698	0.373882	0.462	0.325	1
Ikzf2	0.0038051	-0.443802	0.073	0.132	1
Trak1	0.00386431	0.33128	0.292	0.182	1
Phf20	0.00403122	0.393531	0.379	0.268	1
Gm35188	0.00406703	-0.32208	0.5	0.533	1
Ano4	0.00411762	-0.502759	0.123	0.185	1
Pde4b	0.00416117	-0.399963	0.55	0.556	1
Trim44	0.00427395	-0.445326	0.221	0.288	1
Atp2a2	0.00434071	0.278822	0.358	0.225	1
Scd2	0.00447625	-0.44195	0.125	0.185	1
Arhgef40	0.00453264	-0.437573	0.308	0.351	1
Pfkfb4	0.00460985	0.341829	0.121	0.056	1
Ppm1h	0.00463132	0.288987	0.654	0.51	1
Arid5b	0.00468637	0.40107	0.177	0.099	1
Sox4	0.00501918	-0.492538	0.073	0.129	1
Nrros	0.00510258	0.280539	0.45	0.321	1
Apoe	0.00518779	-0.25087	0.54	0.573	1
Usp32	0.00528415	0.25985	0.262	0.159	1
Trafd1	0.0052965	0.291339	0.194	0.109	1
Npl	0.00534875	0.337802	0.158	0.086	1
Lats1	0.00534983	0.310893	0.154	0.083	1
Prrc2c	0.00541743	0.350639	0.467	0.338	1
Nbeal1	0.00569552	0.271255	0.283	0.179	1
Ankrd27	0.00572172	0.341242	0.129	0.066	1
1700047M11Rik	0.00572346	-0.453623	0.088	0.146	1
Man1c1	0.0058799	0.354685	0.481	0.364	1
Hmgcl	0.00590643	0.267142	0.152	0.079	1
Osbpl1a	0.00598426	0.278272	0.16	0.086	1
Tlr4	0.00599244	0.298134	0.127	0.063	1
Dcaf5	0.00612423	0.270255	0.269	0.169	1
Eif4g3	0.00617768	0.258404	0.627	0.483	1
Amfr	0.00621049	0.2614	0.142	0.073	1
Elk3	0.00625085	0.254825	0.421	0.288	1
Thrb	0.00626682	0.417082	0.138	0.073	1
Rnf13	0.0063394	-0.319263	0.317	0.374	1
Rasa3	0.0064934	0.270289	0.298	0.189	1
Dgkz	0.00653126	0.372074	0.206	0.123	1
C1qc	0.00655357	-0.30723	0.625	0.616	1
Sv2a	0.00686609	-0.41324	0.075	0.129	1
Stk11	0.00688969	0.281494	0.142	0.073	1
Fxr2	0.00704709	0.251277	0.156	0.083	1
Arhgap24	0.00737216	0.304607	0.192	0.116	1
Cul4a	0.00744701	0.356389	0.158	0.089	1
Akap9	0.00755219	0.346465	0.31	0.212	1
Ptprn	0.00756819	0.313549	0.121	0.06	1
Nup98	0.0075725	0.299924	0.254	0.159	1
Osbpl8	0.00771181	0.271723	0.365	0.245	1
Nos1ap	0.00772932	-0.369642	0.319	0.377	1
Baz1a	0.00785689	0.303331	0.271	0.175	1
Wwox	0.00790077	0.315918	0.45	0.344	1
Gas6	0.00796886	0.455751	0.229	0.149	1
Tiam1	0.00807172	0.324547	0.275	0.179	1
Scmh1	0.00828003	0.308158	0.392	0.268	1
Dennd6a	0.00835489	0.326341	0.34	0.232	1
Caprin1	0.00839651	0.263433	0.273	0.175	1
Pofut1	0.00842929	0.259196	0.121	0.06	1
Smim4	0.00856071	-0.418701	0.058	0.106	1
Smc6	0.00861323	0.269351	0.169	0.096	1
Slfn8	0.00869635	0.321605	0.1	0.046	1
Ifitm10	0.00907638	-0.309074	0.448	0.48	1
Mbd5	0.0090895	-0.392552	0.39	0.424	1
Snta1	0.00910045	0.255629	0.379	0.255	1
Dlc1	0.00915176	-0.483349	0.177	0.242	1
Mcph1	0.00918762	0.341205	0.146	0.079	1
Wasl	0.00923024	0.250429	0.185	0.106	1
Smg9	0.00935073	0.256391	0.138	0.073	1
Mir142hg	0.00997171	-0.436415	0.192	0.252	1
Pola1	0.0100497	0.341624	0.108	0.053	1
Foxk2	0.0103872	0.28389	0.265	0.169	1
Akirin1	0.0105131	0.272647	0.123	0.063	1
Stx7	0.010623	0.262451	0.254	0.162	1
Lyst	0.0108222	0.267984	0.273	0.172	1
Trps1	0.0109559	0.338141	0.192	0.116	1
Ncoa6	0.0109606	0.25367	0.202	0.123	1
Dennd2c	0.010964	-0.391801	0.073	0.123	1
Pja2	0.011001	0.265234	0.194	0.116	1
Gria3	0.0110692	0.271011	0.171	0.099	1
Pkn1	0.0111293	0.298728	0.373	0.255	1
Ddx3x	0.0111632	0.269761	0.233	0.149	1
Ubtd1	0.0112682	0.277954	0.279	0.185	1
Insr	0.0115458	0.27923	0.421	0.298	1
Luzp2	0.0115817	0.339912	0.335	0.235	1
Trf	0.0116261	-0.400481	0.252	0.298	1
Slc15a2	0.0117411	0.29172	0.102	0.05	1
Gmfb	0.0118441	0.288974	0.102	0.05	1
Arfgef2	0.0118838	0.317862	0.183	0.109	1
Cdk11b	0.0120535	0.26413	0.254	0.162	1
Magi2	0.0121813	-0.280855	0.481	0.503	1
Ddx31	0.0123254	0.262668	0.165	0.096	1
Rhoh	0.0124843	0.253138	0.325	0.225	1
Cotl1	0.0125607	0.272651	0.304	0.205	1
Gm46224	0.0127176	0.281681	0.1	0.05	1
Galnt7	0.0127248	0.269754	0.152	0.086	1
Canx	0.0129311	0.280847	0.29	0.195	1
Ubap2	0.0129742	0.265006	0.167	0.096	1
Ncoa3	0.0132018	0.261569	0.408	0.298	1
Stat5b	0.0132746	0.341636	0.238	0.156	1
Tent4b	0.0133097	0.302089	0.254	0.166	1
Dpm1	0.013332	0.260222	0.158	0.089	1
Pcnx	0.0133829	0.291842	0.165	0.096	1
Lpp	0.0134304	0.283426	0.396	0.285	1
Ago2	0.0135052	0.272687	0.181	0.109	1
Snx2	0.0135544	0.285335	0.331	0.232	1
Prkcd	0.0137342	0.314587	0.442	0.331	1
Ankfy1	0.0139893	0.252764	0.333	0.232	1
Hmox2	0.0142995	0.269088	0.185	0.113	1
Hipk3	0.0145057	0.261327	0.16	0.093	1
D430042O09Rik	0.0145758	0.258101	0.15	0.086	1
Mtmr2	0.0145976	0.251855	0.129	0.07	1
Aatk	0.0147617	-0.340381	0.156	0.212	1
Inpp5b	0.0150277	0.285067	0.115	0.06	1
Pi4ka	0.0150927	0.28019	0.221	0.139	1
Kdm7a	0.0154144	0.31675	0.323	0.222	1
Nol4l	0.0156562	0.260379	0.252	0.169	1
Bcas3	0.0156953	0.304936	0.456	0.348	1
Ranbp2	0.0161971	0.250664	0.242	0.156	1
Tmem119	0.0164211	-0.343727	0.323	0.364	1
St3gal3	0.0166667	0.259643	0.296	0.202	1
Vti1a	0.0167123	0.355387	0.498	0.407	1
Kctd16	0.0170437	0.263395	0.171	0.103	1
Arid2	0.0174708	0.302889	0.358	0.248	1
Sacm1l	0.0181695	0.279885	0.188	0.116	1
Tmsb4x	0.0196275	-0.328148	0.45	0.444	1
Sh3kbp1	0.0199313	0.283086	0.5	0.384	1
Akr1a1	0.0200756	0.252915	0.181	0.113	1
Cdk14	0.020131	0.278531	0.412	0.311	1
Gspt1	0.0201711	0.288794	0.292	0.202	1
Kcnc2	0.0206618	0.363414	0.181	0.116	1
Rufy3	0.020686	0.250848	0.21	0.136	1
Tspan5	0.0216476	0.345683	0.208	0.139	1
Ttr	0.0220377	0.32454	0.115	0.063	1
Arid4a	0.0220533	0.292185	0.425	0.315	1
Reep5	0.0221961	-0.341685	0.129	0.182	1
Plxnb2	0.0226126	-0.345043	0.275	0.315	1
Pid1	0.0230761	0.257903	0.642	0.536	1
Slc44a1	0.0231383	0.304711	0.135	0.079	1
Ppp2r5c	0.0232739	0.278712	0.408	0.301	1
Myo1d	0.024042	-0.378624	0.198	0.255	1
Dnajc5	0.0241667	0.294845	0.198	0.129	1
Soat1	0.024175	0.261241	0.135	0.079	1
Thumpd3	0.0243005	0.255022	0.123	0.07	1
Kat7	0.0264296	0.25847	0.135	0.079	1
Nsmce2	0.0274116	0.277742	0.312	0.225	1
Tox4	0.0275326	0.268605	0.156	0.096	1
Lrrtm4	0.0275516	0.25573	0.473	0.364	1
Hk3	0.0276458	0.271746	0.217	0.142	1
Rab11fip2	0.0277994	-0.361381	0.104	0.152	1
Eif4ebp2	0.0278343	0.271809	0.14	0.083	1
E230029C05Rik	0.0282096	-0.255458	0.452	0.497	1
Tgfa	0.0283302	0.347933	0.246	0.172	1
Arhgef6	0.0283609	0.280961	0.204	0.136	1
Tmem181a	0.0287803	0.289947	0.115	0.066	1
Myo1f	0.0301859	0.295313	0.546	0.427	1
Phlpp1	0.0303618	-0.439349	0.244	0.285	1
Sec31a	0.0307402	0.251757	0.165	0.103	1
Eya4	0.0309546	0.312378	0.131	0.079	1
Uhrf2	0.0315507	0.273304	0.267	0.185	1
Csmd3	0.0320573	-0.283762	0.558	0.56	1
Timm44	0.032891	0.252943	0.138	0.083	1
Sesn3	0.0330677	-0.277729	0.065	0.106	1
Xpnpep1	0.0333778	-0.311557	0.069	0.109	1
Herc6	0.0338849	0.251331	0.102	0.056	1
Stxbp3	0.0345164	-0.38745	0.188	0.232	1
Nfe2l2	0.035037	0.307833	0.233	0.162	1
Zc3h12b	0.0350407	-0.316275	0.11	0.156	1
Cnksr3	0.0353648	-0.430795	0.117	0.159	1
Ap1s2	0.0357133	-0.336456	0.094	0.136	1
Tubb2a	0.0357317	-0.353838	0.096	0.139	1
Gpr155	0.0357815	-0.353021	0.144	0.185	1
Tnpo1	0.0358369	0.261525	0.317	0.235	1
Pten	0.0362584	-0.341354	0.473	0.48	1
Rprd2	0.0365367	0.288313	0.19	0.129	1
Chn2	0.0373989	-0.256365	0.571	0.573	1
Cxxc5	0.0380471	0.256816	0.277	0.192	1
Cep162	0.0384775	0.264613	0.108	0.063	1
Edem3	0.0385335	0.276788	0.112	0.066	1
Peli2	0.0390522	0.250323	0.252	0.175	1
Stox2	0.0391287	0.356775	0.231	0.166	1
Atp6ap2	0.0396898	-0.319297	0.088	0.129	1
Cdc37l1	0.0397847	-0.396355	0.271	0.301	1
Vapb	0.041133	-0.29859	0.096	0.139	1
St18	0.0420658	-0.32865	0.238	0.281	1
Adam23	0.0425131	-0.392489	0.077	0.116	1
Stxbp5	0.0426184	0.257573	0.312	0.232	1
Emsy	0.0427579	0.294619	0.169	0.113	1
Disc1	0.0434058	-0.375351	0.3	0.334	1
Ubl3	0.0443075	-0.326543	0.302	0.334	1
Pxk	0.0445742	0.2539	0.285	0.205	1
BC005537	0.0451786	-0.302425	0.085	0.126	1
Unc5c	0.0451875	-0.291496	0.292	0.331	1
1700025G04Rik	0.0452157	0.286333	0.11	0.066	1
Dguok	0.0457826	-0.304659	0.085	0.126	1
Dnajc18	0.0461982	-0.281774	0.104	0.149	1
Ypel2	0.0464259	-0.32158	0.19	0.232	1
Itch	0.0467621	-0.25836	0.49	0.507	1
Il18	0.0502697	-0.360719	0.133	0.175	1
Exoc6b	0.0506128	-0.264879	0.44	0.45	1
Arhgap22	0.0562295	-0.287475	0.258	0.295	1
Cntn5	0.0574425	0.305328	0.277	0.209	1
Rai1	0.0577198	0.256781	0.279	0.212	1
Cnot7	0.0586509	-0.340842	0.1	0.136	1
Metap2	0.0588995	0.273995	0.142	0.093	1
Kat2b	0.0593594	0.294209	0.258	0.192	1
Tmem175	0.0602903	0.261309	0.127	0.083	1
Hck	0.0642513	0.258237	0.35	0.268	1
Hdac9	0.0643658	0.251931	0.627	0.55	1
Usf2	0.0652123	-0.312831	0.204	0.235	1
Ywhag	0.0682377	-0.292743	0.125	0.166	1
Ube3c	0.0687245	0.251682	0.358	0.272	1
Cpe	0.0689246	-0.281958	0.25	0.288	1
Ube2j1	0.069733	-0.286676	0.092	0.129	1
Rnf10	0.0707226	-0.323204	0.092	0.126	1
Arhgap31	0.0715942	0.282928	0.488	0.387	1
Epg5	0.0722606	0.294184	0.1	0.063	1
Tmc7	0.0723792	-0.360044	0.106	0.142	1
Nrf1	0.0732099	-0.263436	0.325	0.354	1
Eml1	0.0732484	-0.309854	0.088	0.123	1
Phactr2	0.0744833	0.283028	0.246	0.179	1
Ino80dos	0.0771166	-0.304971	0.115	0.152	1
Fth1	0.0773052	-0.287351	0.162	0.202	1
Oip5os1	0.0776708	-0.293253	0.102	0.139	1
Acsl3	0.0782841	-0.292782	0.171	0.205	1
Sparc	0.0786803	-0.250411	0.579	0.56	1
Fbxw2	0.0807598	-0.325657	0.09	0.123	1
Tapbp	0.082998	-0.277446	0.071	0.103	1
Ints9	0.0871193	-0.283132	0.077	0.109	1
Grik2	0.0889602	-0.318417	0.379	0.387	1
Atxn7l3b	0.0890269	-0.31295	0.075	0.106	1
Yipf5	0.0923257	-0.366633	0.075	0.106	1
Cdh23	0.0950266	-0.261492	0.498	0.48	1
Cd300c2	0.0959605	-0.288216	0.192	0.228	1
Ctnnd1	0.0977053	-0.300892	0.26	0.291	1
Luc7l	0.0984505	-0.307368	0.169	0.202	1
Olfml3	0.0997021	-0.310257	0.242	0.268	1
Bbs9	0.0999995	-0.294713	0.279	0.298	1
Gjc3	0.102012	-0.297343	0.102	0.132	1
Mpeg1	0.103864	-0.257595	0.073	0.103	1
Galnt13	0.103872	-0.322748	0.083	0.113	1
Rps21	0.106602	-0.260827	0.108	0.139	1
N4bp2l2	0.10957	-0.254858	0.206	0.235	1
Ptn	0.11087	-0.309662	0.25	0.278	1
Nr3c2	0.111345	-0.292025	0.156	0.189	1
Rnf220	0.116832	-0.310091	0.225	0.252	1
Gpc6	0.117542	-0.298871	0.227	0.255	1
Rbbp6	0.117618	-0.328166	0.244	0.265	1
Trim2	0.119362	0.251993	0.288	0.222	1
Enpp2	0.12037	-0.321995	0.277	0.288	1
Zfp182	0.126347	-0.255156	0.121	0.152	1
Mdh1	0.127807	-0.280623	0.081	0.109	1
St6galnac3	0.129929	-0.265846	0.133	0.166	1
Slc44a2	0.130399	-0.319806	0.135	0.162	1
Paqr8	0.134376	-0.275382	0.079	0.106	1
Tmem50a	0.134948	-0.366718	0.098	0.123	1
Rad17	0.139753	-0.277639	0.079	0.106	1
Hnrnpk	0.143276	-0.284508	0.217	0.238	1
Trim36	0.144416	-0.282577	0.083	0.109	1
Psip1	0.145156	-0.311415	0.165	0.185	1
Sema4b	0.151124	-0.250668	0.088	0.116	1
Pts	0.151994	-0.266034	0.115	0.142	1
Ndufs1	0.15251	-0.349548	0.117	0.142	1
Eif2a	0.15377	-0.297666	0.092	0.119	1
Tmem208	0.157143	-0.268879	0.108	0.136	1
Gm48678	0.157375	-0.265596	0.129	0.156	1
Apaf1	0.158578	-0.266774	0.088	0.113	1
Sin3a	0.160442	-0.332946	0.119	0.146	1
Sema5a	0.162427	-0.332183	0.112	0.139	1
Gm4258	0.163231	-0.252669	0.352	0.358	1
Galnt11	0.164127	-0.259766	0.169	0.192	1
Rps8	0.169697	-0.251314	0.169	0.195	1
Mapk10	0.172107	-0.322204	0.158	0.182	1
Ilf3	0.174768	-0.295907	0.123	0.149	1
Ppp4r2	0.177264	-0.276924	0.175	0.199	1
Iffo1	0.188049	-0.280914	0.321	0.328	1
Arhgef1	0.192377	-0.250506	0.283	0.291	1
Trim35	0.196321	-0.289249	0.152	0.175	1
Gm31243	0.203282	-0.274748	0.133	0.159	1
Gm44686	0.204072	-0.250668	0.171	0.192	1
Mog	0.206627	-0.331438	0.152	0.175	1
Alcam	0.211232	-0.3024	0.194	0.212	1
Prnp	0.219834	-0.25754	0.085	0.106	1
Kcnd2	0.225904	-0.251439	0.494	0.464	1
Snhg20	0.227999	-0.312183	0.167	0.182	1
Cfap74	0.237285	-0.276463	0.254	0.258	1
Map7	0.245127	-0.288102	0.19	0.205	1
Pdk1	0.245562	-0.277652	0.179	0.199	1
B430010I23Rik	0.248689	-0.267559	0.256	0.265	1
Plekha1	0.249344	-0.27091	0.238	0.248	1
Slc2a13	0.257535	-0.293663	0.083	0.103	1
Pbxip1	0.268115	-0.258996	0.106	0.126	1
Slc22a23	0.270818	-0.252657	0.135	0.156	1
Cers2	0.276802	-0.253313	0.096	0.113	1
Phldb1	0.277162	-0.292138	0.09	0.106	1
Sall3	0.281067	-0.263775	0.144	0.162	1
Cebpg	0.284799	-0.262648	0.096	0.113	1
Psmd4	0.285198	-0.259748	0.11	0.129	1
Vmp1	0.285507	-0.29116	0.171	0.185	1
Itprid2	0.290747	-0.259398	0.133	0.149	1
Pcyt2	0.294378	-0.258403	0.204	0.215	1
Myo1b	0.313385	-0.297459	0.125	0.139	1
Ctps2	0.327805	-0.303279	0.162	0.175	1
Atp5a1	0.328241	-0.273326	0.167	0.179	1
Rab6b	0.34087	-0.2643	0.15	0.162	1
Fam107b	0.34418	-0.262302	0.098	0.113	1
Cic	0.360121	-0.25885	0.092	0.106	1
Ephb1	0.381521	-0.254524	0.144	0.156	1
Mat2a	0.395207	-0.263146	0.204	0.209	1
Tuba1a	0.404943	-0.287091	0.165	0.172	1
Tenm3	0.414768	-0.263542	0.148	0.159	1
Sept7	0.415004	-0.253261	0.377	0.354	1
Rasal3	0.416112	-0.263438	0.192	0.199	1
Gm15489	0.425466	-0.288915	0.183	0.189	1
Mbd6	0.455013	-0.314923	0.154	0.159	1
Meis2	0.459879	-0.288964	0.158	0.162	1
Robo1	0.766913	-0.297117	0.256	0.238	1
Shld2	0.827259	-0.251593	0.119	0.116	1
