# Supplementary material for: Neuroinflammation in an optimized model of lysophosphatidic acid (LPA)-induced post-hemorrhagic hydrocephalus
Source: Research Square preprint supplement (doi:10.21203/rs.3.rs-6762718/v1), 2025-06-03
Supplement: Supplementary file 4 [file fb4d79a13a166b2061251b98.xlsx]

## Sheet: README
Table S2: differential gene expression information
[celltype] tabs list detected genes in each cell type and their log2FC in LPA-injected brains relative to control

## Sheet: Astrocytes
gene	p_val	avg_log2FC	pct.1	pct.2	p_val_adj
Apoe	8.93441e-167	-0.491509	0.986	0.994	2.20885e-162
Cst3	2.31854e-158	-0.649375	0.897	0.936	5.73214e-154
mt-Co3	9.61304e-152	-0.874186	0.249	0.458	2.37663e-147
mt-Atp6	2.40337e-147	-0.88501	0.187	0.391	5.94185e-143
Xist	7.1651e-129	0.619749	0.674	0.408	1.77143e-124
mt-Co2	1.76025e-125	-0.783997	0.174	0.358	4.35187e-121
C4b	4.7071e-105	0.660528	0.232	0.082	1.16374e-100
Tsix	1.43328e-99	0.473332	0.617	0.38	3.5435e-95
mt-Cytb	1.13365e-75	-0.551206	0.108	0.233	2.80272e-71
Ggta1	1.56686e-74	0.476361	0.13	0.034	3.87376e-70
Zbtb16	7.3951e-72	-0.509258	0.416	0.538	1.82829e-67
mt-Co1	1.16679e-70	-0.612393	0.214	0.347	2.88464e-66
Ppp2r2b	4.56123e-69	0.302284	0.945	0.884	1.12767e-64
mt-Nd4	4.66719e-67	-0.528256	0.099	0.213	1.15387e-62
Gfap	4.95954e-66	0.628609	0.312	0.176	1.22615e-61
Sema6d	7.63319e-65	0.373433	0.942	0.879	1.88715e-60
Mertk	3.61686e-64	-0.340538	0.877	0.906	8.94195e-60
Cacna2d3	7.33685e-64	0.577373	0.39	0.245	1.81389e-59
Gm973	6.38422e-59	0.37976	0.542	0.377	1.57837e-54
mt-Nd2	2.19014e-58	-0.456005	0.085	0.186	5.41469e-54
Slc22a23	2.40553e-58	0.433916	0.578	0.423	5.9472e-54
Sctr	2.49445e-58	0.367677	0.164	0.065	6.16703e-54
Cpne8	1.61785e-55	0.437284	0.226	0.114	3.99982e-51
Sfxn5	2.54547e-55	0.269222	0.943	0.892	6.29317e-51
Dst	9.44945e-55	0.331475	0.852	0.751	2.33619e-50
Fkbp5	6.43668e-54	-0.501382	0.094	0.191	1.59134e-49
Htra1	1.58548e-53	-0.321412	0.813	0.846	3.91979e-49
St6galnac5	1.7714e-52	0.506827	0.581	0.447	4.37944e-48
Cfap44	2.62694e-52	0.323176	0.112	0.036	6.4946e-48
Mdga2	7.16027e-52	-0.280551	0.973	0.971	1.77023e-47
Rgs7	3.026e-50	0.339426	0.862	0.778	7.48119e-46
Ptprj	9.36962e-49	-0.451084	0.581	0.652	2.31645e-44
Plp1	2.51765e-46	-0.403833	0.601	0.662	6.22438e-42
Ide	2.4844e-45	0.290088	0.281	0.165	6.14217e-41
Ptgds	4.20807e-45	-0.497491	0.111	0.202	1.04036e-40
Mobp	4.23484e-45	-0.481192	0.392	0.48	1.04698e-40
Apba2	6.47419e-45	0.299174	0.765	0.637	1.60061e-40
Samd4	6.65919e-43	0.366482	0.448	0.317	1.64635e-38
Sorbs1	1.10231e-42	0.462829	0.872	0.801	2.72524e-38
Miat	2.46419e-42	0.347592	0.328	0.21	6.0922e-38
Ttyh1	2.77192e-42	-0.254614	0.873	0.88	6.85303e-38
Plekhg1	1.22565e-41	-0.32357	0.774	0.801	3.03017e-37
Arhgef26	2.7894e-41	0.275841	0.812	0.691	6.89622e-37
Wwc1	5.31018e-41	0.301721	0.775	0.663	1.31284e-36
Slc38a1	6.45123e-40	0.534584	0.212	0.119	1.59494e-35
Rgs6	6.69181e-40	0.30694	0.797	0.683	1.65442e-35
Eif2s3y	1.32722e-39	-0.407663	0.169	0.265	3.28128e-35
Angpt1	2.21504e-39	0.41376	0.337	0.224	5.47624e-35
mt-Nd1	2.66575e-39	-0.340688	0.064	0.136	6.59053e-35
Tmeff2	6.18686e-39	-0.40074	0.687	0.729	1.52958e-34
Hif3a	1.33818e-37	-0.34174	0.494	0.571	3.30839e-33
Pacrg	8.47625e-37	0.371106	0.535	0.411	2.09558e-32
Asap3	1.57589e-36	0.324763	0.18	0.096	3.89608e-32
Plekha7	2.74362e-36	0.288956	0.192	0.105	6.78306e-32
Mbp	9.13999e-36	-0.362031	0.62	0.661	2.25968e-31
Rfx4	1.25741e-35	0.263647	0.741	0.616	3.10869e-31
Fchsd2	1.44154e-35	0.26987	0.652	0.52	3.56392e-31
D030047H15Rik	2.12697e-35	-0.370966	0.467	0.535	5.25851e-31
Mapk10	2.57725e-35	0.265938	0.731	0.616	6.37173e-31
Ctif	2.2439e-34	0.266648	0.515	0.388	5.5476e-30
Gnao1	2.31163e-34	0.267929	0.887	0.829	5.71504e-30
Tnfrsf19	3.76351e-34	0.303497	0.647	0.529	9.30452e-30
Prdm16	4.59737e-34	0.254949	0.746	0.626	1.13661e-29
Dgki	5.92965e-34	0.341335	0.557	0.439	1.46599e-29
Ctnna2	9.87101e-34	0.298153	0.901	0.834	2.44041e-29
Frem2	1.30634e-33	0.304051	0.356	0.245	3.22966e-29
Bcl2	1.43578e-33	0.279264	0.704	0.587	3.54967e-29
Meis2	2.31015e-33	0.274749	0.742	0.648	5.71138e-29
Ckb	2.97715e-33	-0.255636	0.832	0.85	7.36041e-29
A2m	4.85933e-33	0.364073	0.112	0.05	1.20137e-28
Mir670hg	1.22709e-32	0.359555	0.224	0.137	3.03374e-28
Tmem108	2.37883e-32	0.322201	0.264	0.17	5.88118e-28
Uty	3.26083e-32	-0.337289	0.158	0.243	8.06175e-28
Tcf7l1	1.36212e-31	0.278271	0.547	0.416	3.36756e-27
Gm4876	2.14013e-31	0.330215	0.456	0.342	5.29103e-27
Cadps	3.64798e-31	0.321657	0.399	0.286	9.01889e-27
Prune2	1.09876e-30	0.336954	0.213	0.13	2.71647e-26
Atp1b2	1.12668e-30	-0.307711	0.578	0.621	2.78549e-26
St3gal4	1.56436e-30	-0.273461	0.708	0.757	3.86756e-26
Mir9-3hg	4.30127e-30	0.250437	0.717	0.602	1.0634e-25
Sncaip	7.90436e-30	0.293709	0.344	0.24	1.95419e-25
Myo1e	5.11581e-28	0.252015	0.416	0.305	1.26478e-23
Pigk	2.21543e-27	0.299369	0.439	0.335	5.47722e-23
Btbd17	2.94439e-27	-0.350248	0.264	0.336	7.27941e-23
Shroom3	6.84453e-27	0.349553	0.126	0.067	1.69217e-22
Galnt18	1.31002e-26	-0.425763	0.475	0.527	3.23877e-22
Pdzrn3	2.91219e-26	0.327928	0.374	0.279	7.1998e-22
Sulf1	3.86013e-26	0.276726	0.108	0.054	9.54341e-22
Rmst	5.89212e-26	-0.394307	0.592	0.643	1.45671e-21
Clu	3.04538e-25	-0.355949	0.572	0.605	7.52908e-21
Ddx3y	4.65162e-25	-0.306218	0.08	0.138	1.15002e-20
Nxn	8.49905e-25	-0.296402	0.574	0.629	2.10122e-20
Gjb6	9.94927e-25	-0.344878	0.294	0.364	2.45976e-20
Gm35552	1.32622e-24	0.252339	0.21	0.134	3.2788e-20
Cd81	1.66399e-24	-0.277817	0.572	0.611	4.11387e-20
Tsc22d3	3.60643e-24	-0.32214	0.193	0.263	8.91618e-20
Cmya5	1.20029e-23	0.369887	0.236	0.161	2.96748e-19
Gpr37l1	2.90898e-23	-0.274934	0.614	0.642	7.19187e-19
Enox1	3.2922e-23	0.254795	0.5	0.398	8.1393e-19
Fam214a	1.08803e-22	-0.318457	0.536	0.572	2.68994e-18
Csmd1	1.33919e-22	0.285522	0.89	0.837	3.31087e-18
Neat1	1.40557e-22	0.387944	0.28	0.2	3.47499e-18
Rcan2	1.56101e-22	0.275994	0.2	0.131	3.8593e-18
F3	3.64762e-22	-0.256979	0.62	0.655	9.01801e-18
Scd2	4.03715e-22	-0.273207	0.602	0.635	9.98106e-18
Azin1	7.41225e-22	-0.333144	0.271	0.333	1.83253e-17
Mfge8	9.2195e-22	-0.320492	0.345	0.407	2.27934e-17
Glis3	4.36731e-21	0.301602	0.747	0.676	1.07973e-16
Gfra1	8.54691e-21	0.250272	0.341	0.256	2.11305e-16
Hacd2	1.57963e-20	-0.2647	0.618	0.647	3.90531e-16
Frmpd1	2.73764e-20	-0.263101	0.583	0.616	6.76828e-16
Prickle1	4.99681e-20	-0.326484	0.353	0.412	1.23536e-15
Sparc	3.22529e-19	-0.306514	0.352	0.409	7.97388e-15
Itm2b	6.16204e-18	-0.305502	0.477	0.512	1.52344e-13
Mxd4	1.41984e-17	-0.288972	0.269	0.324	3.51027e-13
Sorcs1	3.76152e-17	0.362749	0.248	0.183	9.29961e-13
Wnk2	2.36908e-16	-0.250943	0.619	0.637	5.85707e-12
Rhou	2.66321e-16	-0.277843	0.229	0.283	6.58424e-12
Irak2	2.88766e-16	-0.267726	0.562	0.585	7.13917e-12
Lrrc58	1.11377e-15	-0.278307	0.353	0.399	2.75357e-11
5031439G07Rik	1.60271e-15	-0.304091	0.387	0.431	3.96237e-11
Cox4i1	8.26609e-15	-0.283535	0.287	0.333	2.04363e-10
Dzip1l	1.50401e-14	-0.289416	0.336	0.375	3.71836e-10
Hes5	5.84755e-14	-0.287926	0.345	0.391	1.44569e-09
Mt1	6.6651e-14	-0.256694	0.493	0.526	1.64781e-09
Klhl2	3.09819e-13	-0.265117	0.343	0.382	7.65964e-09
Mog	6.10851e-13	-0.268754	0.169	0.214	1.51021e-08
Dock10	9.58822e-12	-0.267933	0.433	0.467	2.37049e-07
Zfp536	3.95868e-11	-0.320144	0.172	0.213	9.78705e-07
St18	1.02827e-06	-0.266571	0.278	0.302	0.025422
Slc4a10	0.0123635	-0.257259	0.132	0.144	1

## Sheet: Ependymal
gene	p_val	avg_log2FC	pct.1	pct.2	p_val_adj
Xist	1.07634e-59	1.20981	0.68	0.231	2.66103e-55
Uty	3.43432e-30	-0.787456	0.175	0.421	8.49068e-26
Tsix	8.67824e-30	0.778968	0.576	0.287	2.14552e-25
mt-Atp6	8.95072e-26	-0.914531	0.232	0.455	2.21289e-21
mt-Co3	2.78105e-25	-1.00823	0.295	0.511	6.8756e-21
mt-Co2	5.63934e-24	-0.904068	0.238	0.448	1.39422e-19
mt-Co1	2.98724e-22	-0.975686	0.264	0.464	7.38536e-18
Eif2s3y	9.99291e-20	-0.663057	0.152	0.332	2.47055e-15
mt-Nd4	3.90653e-17	-0.732469	0.154	0.317	9.65813e-13
mt-Cytb	3.01812e-16	-0.6641	0.143	0.3	7.4617e-12
Ctnnd2	3.2026e-14	0.533727	0.723	0.558	7.91779e-10
Ddx3y	3.77044e-13	-0.478853	0.104	0.231	9.32165e-09
Bex3	9.08307e-13	0.48017	0.354	0.191	2.24561e-08
Gm26917	3.17871e-12	0.520165	0.852	0.755	7.85873e-08
Rgs20	4.8951e-12	0.549248	0.355	0.198	1.21022e-07
Mir670hg	6.30351e-12	0.614639	0.307	0.163	1.55842e-07
mt-Nd2	1.92035e-11	-0.466665	0.115	0.234	4.74769e-07
Deup1	2.09537e-11	0.839277	0.154	0.051	5.18038e-07
Tnfrsf19	2.31853e-11	0.458012	0.392	0.233	5.73209e-07
Gpm6b	5.12345e-11	0.500317	0.536	0.368	1.26667e-06
Shc3	7.58856e-11	0.377734	0.219	0.096	1.87612e-06
Nwd1	8.15619e-11	0.53205	0.607	0.463	2.01645e-06
Cdh4	1.35369e-10	0.79545	0.271	0.14	3.34673e-06
Phkg1	1.51009e-10	0.526889	0.475	0.331	3.73341e-06
Rapgef1	2.78001e-10	0.437722	0.505	0.348	6.87301e-06
Hunk	3.05457e-10	0.414547	0.365	0.216	7.55181e-06
Esrrg	5.24814e-10	-0.316339	0.795	0.861	1.2975e-05
Cd109	6.31409e-10	0.45697	0.214	0.099	1.56103e-05
Nrxn1	8.11358e-10	0.261089	0.832	0.694	2.00592e-05
Enpp2	9.52754e-10	-0.519396	0.634	0.713	2.35549e-05
4930544I03Rik	1.12312e-09	0.464278	0.153	0.058	2.77669e-05
Gm36037	1.17909e-09	0.603769	0.415	0.271	2.91506e-05
Gm867	1.86904e-09	0.54559	0.38	0.249	4.62082e-05
Btaf1	1.90801e-09	0.318454	0.473	0.31	4.71716e-05
Ptprz1	1.93972e-09	0.395856	0.653	0.496	4.79558e-05
Ptprj	2.09682e-09	0.312422	0.399	0.248	5.18396e-05
Lrrc23	2.36175e-09	0.440374	0.618	0.471	5.83896e-05
Ift140	2.55849e-09	0.274897	0.368	0.218	6.32537e-05
Nrg1	2.63201e-09	0.475267	0.64	0.497	6.50712e-05
Apoe	2.98139e-09	-0.693992	0.709	0.74	7.3709e-05
A330033J07Rik	3.71421e-09	0.444901	0.108	0.032	9.18265e-05
Ccdc39	4.39677e-09	0.428327	0.824	0.741	0.000108701
Dnah2	4.66465e-09	0.370877	0.7	0.569	0.000115324
Prlr	5.93946e-09	-0.553833	0.348	0.464	0.000146841
Dpy19l2	6.19786e-09	0.369533	0.336	0.2	0.00015323
Fnbp1	6.43401e-09	0.468023	0.675	0.539	0.000159068
Rfx4	7.80344e-09	0.484559	0.421	0.285	0.000192924
Ttll3	9.56253e-09	0.493866	0.623	0.499	0.000236415
Dnah10	1.52747e-08	0.647242	0.49	0.369	0.000377637
Tmeff2	1.75761e-08	-0.515252	0.646	0.718	0.000434534
Cfap44	1.83833e-08	0.350358	0.922	0.868	0.00045449
Slc22a17	1.98485e-08	-0.395358	0.628	0.69	0.000490714
Sorbs1	2.04171e-08	0.522356	0.816	0.737	0.000504772
Iqank1	2.17811e-08	0.309347	0.232	0.12	0.000538494
Pde3b	2.39314e-08	0.253237	0.122	0.043	0.000591657
Dnaaf4	2.77874e-08	0.345694	0.242	0.131	0.000686988
Cdk5rap2	3.19365e-08	0.295692	0.608	0.435	0.000789567
Gli3	3.31013e-08	0.341662	0.314	0.19	0.000818363
Slc6a20a	3.61656e-08	-0.507959	0.292	0.399	0.000894122
Wwc1	4.1207e-08	0.315423	0.895	0.798	0.00101876
March3	4.20658e-08	0.28292	0.29	0.167	0.00103999
Grk4	5.08937e-08	0.32867	0.624	0.478	0.00125824
Gm40578	5.09544e-08	0.394154	0.278	0.161	0.00125975
Mobp	5.566e-08	-0.522728	0.423	0.515	0.00137608
Nmnat2	5.95406e-08	0.375279	0.372	0.241	0.00147202
Dnaic2	6.39085e-08	0.295687	0.218	0.114	0.00158001
Epha5	6.42134e-08	0.366585	0.294	0.174	0.00158755
Myb	6.51942e-08	0.385543	0.253	0.14	0.0016118
Arhgef26	7.12842e-08	0.358353	0.439	0.299	0.00176236
Ttc28	7.28157e-08	0.457817	0.744	0.642	0.00180022
Dnah3	7.30339e-08	0.558068	0.502	0.388	0.00180562
Asb14	8.02183e-08	0.291572	0.295	0.174	0.00198324
Pde1a	8.69853e-08	0.353055	0.297	0.176	0.00215054
Mbp	8.95434e-08	-0.451298	0.634	0.694	0.00221378
Slc44a5	9.41649e-08	0.416134	0.185	0.094	0.00232804
Ak7	1.0193e-07	0.445689	0.59	0.486	0.00252002
Asap1	1.04239e-07	0.285674	0.711	0.576	0.00257711
Slc1a3	1.24434e-07	0.381014	0.498	0.361	0.00307639
Ccdc40	1.39944e-07	0.29071	0.303	0.183	0.00345984
Sgk1	1.57852e-07	-0.44294	0.373	0.475	0.00390258
Arhgef4	1.62119e-07	0.320132	0.468	0.336	0.00400807
mt-Nd1	1.69289e-07	-0.331666	0.067	0.142	0.00418534
Fhod3	1.7568e-07	0.374179	0.432	0.303	0.00434333
Hdac9	1.97865e-07	0.374797	0.491	0.353	0.00489181
Wdr63	2.09785e-07	0.329322	0.656	0.53	0.00518651
Ptprt	2.14363e-07	0.362374	0.476	0.344	0.00529969
Nav2	2.28342e-07	0.293808	0.842	0.745	0.00564529
Kdm5d	2.32959e-07	-0.295071	0.089	0.171	0.00575944
Mks1	2.36031e-07	0.25407	0.31	0.186	0.00583539
Ccdc180	2.46684e-07	0.388616	0.485	0.358	0.00609877
Ccdc88c	2.48489e-07	0.34155	0.553	0.419	0.0061434
Wdr27	2.56486e-07	0.33944	0.287	0.174	0.0063411
Cfap97d2	2.72137e-07	0.325573	0.464	0.324	0.00672804
Ccdc173	2.80319e-07	0.347915	0.609	0.474	0.00693033
Pakap	2.82922e-07	0.322258	0.601	0.46	0.00699467
Lrrc71	3.06334e-07	0.397136	0.449	0.328	0.00757349
Kif9	3.07443e-07	0.346591	0.677	0.565	0.00760091
Synpo2	3.22811e-07	0.307861	0.34	0.215	0.00798087
Cfap46	3.3427e-07	0.431706	0.521	0.413	0.00826417
Otx2os1	3.48745e-07	-0.375671	0.538	0.656	0.00862201
Lrrk1	3.76754e-07	0.258265	0.107	0.04	0.00931448
P2rx7	3.89171e-07	0.267921	0.157	0.073	0.00962147
Ptpn20	3.94763e-07	0.272005	0.13	0.055	0.00975972
Wdr49	4.36945e-07	0.467466	0.515	0.409	0.0108026
Fsip1	4.4603e-07	0.261775	0.29	0.174	0.0110272
Tmem232	4.54528e-07	0.342926	0.548	0.417	0.0112373
6820408C15Rik	5.09233e-07	0.267513	0.368	0.241	0.0125898
Cacna1d	5.22559e-07	0.277081	0.679	0.54	0.0129192
Rfx2	5.38246e-07	0.282234	0.602	0.457	0.013307
Nr2f1	5.97156e-07	0.29736	0.192	0.101	0.0147635
Lrrc43	6.07165e-07	0.377936	0.382	0.263	0.0150109
Ank2	6.09903e-07	0.293845	0.744	0.602	0.0150786
Npnt	6.44944e-07	0.312878	0.277	0.171	0.015945
Tbc1d31	6.96765e-07	0.312369	0.367	0.247	0.0172261
Crtc3	7.13625e-07	0.377906	0.629	0.523	0.017643
Zfp608	7.38313e-07	0.262455	0.773	0.636	0.0182533
Pde3a	7.61582e-07	0.276583	0.122	0.051	0.0188286
Tmem132b	7.9707e-07	0.384261	0.41	0.293	0.019706
Hsp90ab1	8.04174e-07	-0.328697	0.402	0.49	0.0198816
Nlgn1	8.89126e-07	0.306633	0.77	0.663	0.0219819
Ccdc88a	9.29916e-07	0.287856	0.644	0.522	0.0229903
Dab1	9.43724e-07	0.315991	0.541	0.408	0.0233317
Ccdc170	1.28891e-06	0.309234	0.646	0.519	0.0318656
Pou2f1	1.47926e-06	0.261015	0.389	0.267	0.0365718
Atad5	1.64571e-06	0.331907	0.197	0.11	0.0406869
Sulf2	1.70374e-06	0.262996	0.303	0.191	0.0421215
Spag16	1.72005e-06	0.306945	0.956	0.927	0.0425249
Plekha7	1.79685e-06	0.276251	0.735	0.605	0.0444236
Ccdc192	1.87478e-06	0.424448	0.148	0.073	0.0463501
Cfap100	1.89215e-06	0.302182	0.469	0.342	0.0467796
Togaram2	1.93194e-06	0.348066	0.402	0.288	0.0477634
Mgat5	2.0212e-06	0.344124	0.505	0.379	0.0499701
Ulk4	2.09642e-06	0.280737	0.726	0.613	0.0518298
Ankfn1	2.13234e-06	0.382833	0.588	0.479	0.0527178
Meis2	2.19643e-06	0.417313	0.475	0.362	0.0543024
Adamts6	2.22788e-06	0.275423	0.345	0.23	0.0550799
Cacnb4	2.23626e-06	-0.325651	0.644	0.7	0.055287
Ccdc150	2.2873e-06	0.322626	0.322	0.216	0.0565489
Ntrk2	2.39223e-06	0.378632	0.844	0.73	0.0591431
Plcl1	2.54573e-06	-0.366408	0.657	0.712	0.0629382
Cadm1	2.62468e-06	0.339158	0.644	0.536	0.0648899
Gnao1	2.63606e-06	0.398491	0.524	0.413	0.0651712
Dkk3	2.68798e-06	0.353263	0.246	0.149	0.066455
Wdr95	2.73936e-06	0.27575	0.143	0.069	0.0677252
Csrp2	2.74634e-06	-0.357686	0.264	0.346	0.0678978
Gm4681	2.93247e-06	0.25155	0.335	0.22	0.0724995
Rnf32	3.08269e-06	0.251261	0.381	0.256	0.0762134
Cpe	3.11012e-06	0.452096	0.643	0.537	0.0768914
Ttc21a	3.54234e-06	0.329034	0.597	0.483	0.0875774
Nin	3.75141e-06	0.3071	0.496	0.371	0.0927462
Agbl3	3.796e-06	0.31279	0.492	0.373	0.0938485
Bach2	3.90976e-06	0.269349	0.398	0.285	0.0966611
Cfap99	4.29538e-06	0.264203	0.255	0.157	0.106195
Cfap69	4.59451e-06	0.25823	0.886	0.818	0.11359
Nhsl2	4.81086e-06	-0.401699	0.515	0.599	0.118939
Hdac4	4.81136e-06	0.341977	0.621	0.497	0.118951
Ptprn2	5.31042e-06	0.289191	0.41	0.289	0.13129
Morn3	5.42844e-06	0.310528	0.35	0.242	0.134207
Adgrb3	5.67704e-06	0.268995	0.767	0.672	0.140353
Gm26777	5.88402e-06	0.250865	0.232	0.139	0.145471
Nme9	5.92699e-06	0.253501	0.309	0.204	0.146533
Drc3	6.04927e-06	0.269898	0.538	0.427	0.149556
Cfap61	6.23761e-06	0.26586	0.736	0.631	0.154212
Strbp	7.04327e-06	0.332181	0.945	0.91	0.174131
Dst	7.3648e-06	0.251517	0.859	0.759	0.18208
Rgs7	7.55628e-06	0.251036	0.332	0.222	0.186814
Cep112	7.8244e-06	0.265743	0.47	0.348	0.193443
Ccdc30	8.12969e-06	0.286409	0.828	0.749	0.20099
Arhgef33	8.19583e-06	0.272268	0.406	0.289	0.202626
Wdr66	8.31295e-06	0.350342	0.495	0.383	0.205521
Hectd2os	8.44884e-06	0.318853	0.181	0.102	0.208881
Map6	8.51195e-06	0.279391	0.18	0.102	0.210441
Oxr1	8.60799e-06	0.348647	0.674	0.569	0.212815
Gm28376	8.92801e-06	-0.423104	0.414	0.508	0.220727
Nek11	9.68057e-06	0.254538	0.669	0.554	0.239333
Dnah1	9.86444e-06	0.267028	0.334	0.225	0.243878
Jph1	1.09421e-05	-0.343179	0.364	0.452	0.270522
Adgb	1.1117e-05	0.290644	0.41	0.296	0.274845
Rhbdl3	1.16475e-05	0.314576	0.258	0.169	0.287962
Rgs22	1.22614e-05	0.364551	0.566	0.466	0.303138
Trp73	1.31625e-05	0.250734	0.392	0.277	0.325416
Adss	1.38915e-05	0.276278	0.269	0.176	0.343439
Dnah12	1.40025e-05	0.361701	0.562	0.453	0.346183
Galnt14	1.43392e-05	0.325688	0.177	0.101	0.354508
Ccdc148	1.46457e-05	0.25841	0.705	0.598	0.362085
Afap1l2	1.531e-05	0.310196	0.33	0.229	0.378509
Slc22a23	1.57088e-05	0.28596	0.446	0.335	0.38837
Steap2	1.8432e-05	-0.329419	0.176	0.255	0.455694
Crocc2	1.86571e-05	0.478069	0.446	0.354	0.461259
Dner	2.12094e-05	0.296009	0.248	0.161	0.52436
Lrmda	2.27472e-05	0.48397	0.269	0.183	0.56238
Boc	2.31381e-05	0.278521	0.249	0.163	0.572042
Dnah5	2.34355e-05	0.301603	0.522	0.41	0.579396
Slc35f3	2.4198e-05	0.342566	0.433	0.332	0.598248
Cfap54	2.50065e-05	0.267495	0.876	0.833	0.618237
Pitpnm3	2.52903e-05	0.266816	0.296	0.198	0.625252
Zbbx	2.54457e-05	0.2513	0.651	0.539	0.629093
Nxpe4	2.67117e-05	0.294011	0.438	0.332	0.660395
Cfap74	2.72294e-05	0.256552	0.809	0.711	0.673192
Fzd3	2.87313e-05	0.259765	0.35	0.245	0.710323
Kcnh1	2.93244e-05	-0.284301	0.526	0.61	0.724988
Rorb	3.02745e-05	0.34458	0.245	0.161	0.748477
Sctr	3.14917e-05	0.267445	0.251	0.161	0.778568
Atp6v0b	3.1912e-05	-0.285861	0.484	0.539	0.78896
Lama3	3.22261e-05	0.293427	0.186	0.11	0.796725
Pde10a	3.43378e-05	0.422544	0.475	0.364	0.848934
Cntn1	3.55224e-05	-0.348222	0.622	0.665	0.87822
Peak1	3.77309e-05	-0.258626	0.717	0.764	0.93282
Frmpd2	3.93611e-05	0.306775	0.493	0.387	0.973124
Gfra1	3.97929e-05	0.275923	0.223	0.142	0.983799
March4	3.99551e-05	0.27788	0.312	0.216	0.98781
Ttc16	4.80296e-05	0.321131	0.319	0.23	1
Plp1	5.30337e-05	-0.392618	0.608	0.635	1
Mtss1	5.40271e-05	0.26123	0.551	0.442	1
Nxn	5.82702e-05	-0.250673	0.726	0.769	1
Arid5b	5.9956e-05	-0.371994	0.519	0.57	1
Mapk10	6.05271e-05	0.254496	0.676	0.588	1
Ttr	6.23109e-05	-0.297655	0.525	0.61	1
Ccdc18	6.88618e-05	0.26202	0.112	0.056	1
Kctd1	6.95798e-05	0.325072	0.622	0.521	1
Cfap65	7.21708e-05	0.279862	0.696	0.618	1
Cdhr3	7.24964e-05	0.293002	0.447	0.342	1
Slc4a10	7.49896e-05	-0.302962	0.556	0.638	1
Ctnna2	7.76509e-05	0.278367	0.663	0.548	1
Dnah7c	8.14075e-05	0.251293	0.563	0.457	1
Mpp7	8.77381e-05	-0.289264	0.468	0.551	1
Luzp2	8.78185e-05	0.281691	0.433	0.325	1
Ypel2	9.15845e-05	-0.345922	0.258	0.324	1
Slit2	9.48527e-05	-0.313525	0.464	0.539	1
Zswim6	0.000103615	0.386745	0.599	0.518	1
Ccdc171	0.000121683	0.266916	0.62	0.518	1
Asic2	0.000123136	0.287855	0.648	0.55	1
Col8a1	0.000127239	-0.325689	0.426	0.523	1
Cadm2	0.000131365	-0.291908	0.889	0.887	1
Gmnc	0.000163298	-0.348385	0.542	0.603	1
Cep128	0.000186097	0.430043	0.585	0.493	1
Stox1	0.000195712	0.309937	0.206	0.135	1
Enkur	0.000198403	0.276229	0.508	0.417	1
Nhsl1	0.000203629	0.260719	0.657	0.552	1
Itpr1	0.000220614	-0.251488	0.819	0.821	1
Defb9	0.000234863	-0.342719	0.235	0.303	1
Ptgds	0.000244215	-0.328849	0.191	0.256	1
Pbx4	0.000266731	0.267994	0.341	0.253	1
Mapk4	0.000282297	-0.282495	0.585	0.645	1
Kcnq5	0.000346792	0.309073	0.348	0.253	1
Etl4	0.000376914	-0.35347	0.71	0.69	1
Anks1b	0.000407687	0.269929	0.656	0.55	1
Zfp536	0.000421687	-0.283048	0.551	0.596	1
Bbof1	0.000430421	0.290392	0.502	0.405	1
Gucd1	0.000447722	-0.355576	0.226	0.285	1
Slc4a5	0.000470383	-0.264422	0.414	0.486	1
Atp2b3	0.000541386	-0.26422	0.46	0.547	1
Col9a3	0.000541964	-0.295143	0.548	0.607	1
Kctd16	0.000561408	0.288061	0.245	0.174	1
Atp2b2	0.000576501	-0.30052	0.629	0.64	1
Cdh18	0.00058974	-0.406304	0.39	0.439	1
Slc12a2	0.000596289	-0.272566	0.52	0.573	1
Serpinb6a	0.000609017	-0.255454	0.164	0.222	1
Dnaaf3	0.000680956	0.262028	0.509	0.413	1
4930511M06Rik	0.000690965	-0.337729	0.215	0.275	1
Kif24	0.000737389	0.259115	0.355	0.274	1
Sytl2	0.000868725	-0.304951	0.295	0.343	1
Pcbp3	0.000912037	-0.341709	0.543	0.567	1
Tmem132a	0.000978636	-0.282726	0.276	0.333	1
Hsp90b1	0.000979569	-0.251771	0.371	0.412	1
Grid1	0.00124182	0.316156	0.312	0.245	1
Abca4	0.00176723	-0.282957	0.396	0.459	1
Erlin2	0.00181858	0.302625	0.196	0.139	1
Rps8	0.00203622	-0.261125	0.252	0.303	1
Rarres2	0.00227199	-0.382877	0.156	0.2	1
Pdgfd	0.00240978	-0.256783	0.512	0.562	1
Fth1	0.00246688	-0.260951	0.279	0.326	1
Gmds	0.00256267	-0.307932	0.375	0.416	1
Fbn1	0.00259135	-0.28981	0.315	0.36	1
Syt1	0.00275952	-0.253066	0.583	0.601	1
Thyn1	0.00280789	-0.268061	0.184	0.233	1
Elovl7	0.0033667	-0.284642	0.441	0.471	1
Bad	0.00413458	-0.276471	0.347	0.386	1
Dbi	0.00441522	-0.31782	0.375	0.416	1
Mag	0.00451318	-0.28905	0.242	0.285	1
Dthd1	0.00484333	-0.327861	0.239	0.288	1
Ap1s2	0.00587037	-0.278501	0.312	0.354	1
St3gal5	0.00646489	-0.270878	0.373	0.406	1
Nnat	0.00736666	0.342302	0.585	0.515	1
Crim1	0.00834425	0.27093	0.359	0.299	1
Nkain2	0.0205152	-0.339167	0.812	0.802	1
Cul4b	0.0230179	-0.259189	0.309	0.336	1
Slc24a2	0.0233583	-0.300376	0.297	0.328	1
Rnf220	0.0525215	-0.257336	0.315	0.336	1
Arhgap28	0.0606649	-0.268408	0.319	0.343	1
Pcdh9	0.158787	-0.275396	0.92	0.909	1
Rassf9	0.176432	-0.251636	0.409	0.404	1
St18	0.342127	-0.264533	0.304	0.303	1
Pde4b	0.843751	-0.271333	0.563	0.496	1

## Sheet: Immune
gene	p_val	avg_log2FC	pct.1	pct.2	p_val_adj
Cst3	1.96589e-34	-0.963663	0.716	0.861	4.86028e-30
Malat1	4.42292e-32	-0.289899	1	1	1.09348e-27
Anapc15	4.33639e-28	1.38471	0.457	0.168	1.07208e-23
mt-Co3	3.32779e-23	-1.22415	0.15	0.362	8.22729e-19
Rftn1	4.19441e-22	1.19739	0.35	0.11	1.03698e-17
mt-Atp6	1.69083e-20	-1.20812	0.112	0.292	4.18024e-16
Abca1	2.22066e-19	0.841794	0.725	0.516	5.49013e-15
Ctsb	3.41879e-18	0.851178	0.58	0.331	8.45228e-14
Gpnmb	3.706e-18	1.74845	0.142	0	9.16233e-14
Lrmda	1.67351e-17	0.572832	0.909	0.776	4.13741e-13
Plek	2.79875e-17	0.956615	0.356	0.133	6.91935e-13
Mitf	6.99243e-17	0.8365	0.603	0.36	1.72874e-12
Slc38a6	8.12167e-17	0.807359	0.451	0.215	2.00792e-12
Selenop	1.21961e-16	0.91093	0.42	0.195	3.01524e-12
Rcbtb2	1.65802e-16	0.811263	0.36	0.139	4.09912e-12
Arhgap24	2.21903e-16	0.951378	0.317	0.118	5.48612e-12
Hpse	3.0147e-16	0.85786	0.131	0.002	7.45324e-12
Cacna1a	3.69019e-16	0.978716	0.403	0.186	9.12326e-12
Gramd1b	9.41534e-16	0.714044	0.301	0.101	2.32775e-11
Man1c1	9.89786e-16	0.769033	0.624	0.406	2.44705e-11
Bcar3	1.10945e-15	1.01402	0.2	0.041	2.7429e-11
Mbp	1.39543e-15	-0.59632	0.599	0.698	3.44992e-11
Fkbp5	3.58244e-15	-0.86896	0.286	0.449	8.85686e-11
Ccnd3	4.21812e-15	-0.623252	0.637	0.747	1.04285e-10
Nrp1	8.37301e-15	0.599284	0.649	0.41	2.07006e-10
Spp1	9.33952e-15	1.50137	0.128	0.006	2.30901e-10
Abhd12	2.41891e-14	0.630399	0.726	0.501	5.98026e-10
Fnip2	2.77735e-14	1.23384	0.444	0.259	6.86644e-10
Dgkz	5.83916e-14	0.852336	0.359	0.166	1.44361e-09
Arid5b	8.46097e-14	0.88057	0.337	0.147	2.09181e-09
Igf1	9.24526e-14	0.948276	0.253	0.087	2.28571e-09
Fli1	1.08209e-13	0.504556	0.845	0.702	2.67524e-09
Vps13c	1.35297e-13	0.755595	0.426	0.219	3.34494e-09
Gm26917	1.99015e-13	0.584803	0.727	0.524	4.92025e-09
Plekhm2	2.0651e-13	0.66797	0.39	0.182	5.10554e-09
Pcdh9	3.92426e-13	-0.392685	0.906	0.915	9.70196e-09
mt-Co2	4.13832e-13	-0.876064	0.115	0.253	1.02312e-08
Snx24	5.29543e-13	0.621905	0.634	0.424	1.30919e-08
Apobec1	5.44964e-13	1.03433	0.314	0.143	1.34731e-08
mt-Cytb	1.14645e-12	-0.76367	0.049	0.157	2.83436e-08
C1qa	1.20842e-12	-0.648175	0.524	0.615	2.98758e-08
Cd163	1.39705e-12	-0.933456	0.048	0.159	3.45393e-08
F13a1	1.51837e-12	-1.42116	0.107	0.244	3.75388e-08
Lama3	2.51514e-12	1.02699	0.109	0.006	6.21818e-08
St6gal1	3.85252e-12	0.661118	0.484	0.28	9.52459e-08
Gpr137b	5.00483e-12	0.713871	0.265	0.104	1.23734e-07
Fmn1	5.01025e-12	0.803461	0.277	0.112	1.23868e-07
Blnk	5.47622e-12	0.62149	0.495	0.28	1.35389e-07
Ppm1h	6.18532e-12	0.533562	0.759	0.58	1.5292e-07
Sgpl1	1.153e-11	0.593114	0.295	0.124	2.85057e-07
Abr	1.23936e-11	0.61324	0.464	0.251	3.06406e-07
Ttyh2	1.50136e-11	0.637382	0.142	0.027	3.7118e-07
Syngr1	2.49548e-11	0.48808	0.314	0.13	6.16957e-07
Cd9	3.22198e-11	0.684029	0.25	0.095	7.9657e-07
Gm30489	4.11878e-11	-0.886395	0.067	0.178	1.01829e-06
Arhgap25	4.78559e-11	0.53081	0.442	0.23	1.18314e-06
Tmcc3	6.26679e-11	0.378751	0.847	0.663	1.54934e-06
Pnpla7	6.55763e-11	0.593355	0.653	0.453	1.62124e-06
Mthfs	2.17725e-10	0.621632	0.33	0.161	5.38281e-06
Tmeff2	2.23721e-10	-0.431066	0.657	0.733	5.53105e-06
Plp1	2.5397e-10	-0.51246	0.58	0.652	6.27891e-06
Lyst	4.21423e-10	0.623299	0.37	0.193	1.04188e-05
Slc8a1	5.65766e-10	0.366494	0.936	0.847	1.39874e-05
Myo1f	6.7212e-10	0.541297	0.62	0.422	1.66168e-05
Eya4	7.70034e-10	0.61513	0.215	0.081	1.90375e-05
Gas6	7.78912e-10	0.604622	0.418	0.24	1.9257e-05
Numb	1.30086e-09	-0.48434	0.723	0.762	3.21612e-05
Pvt1	1.32979e-09	0.548532	0.217	0.083	3.28764e-05
Fnip1	1.69259e-09	0.527589	0.539	0.34	4.18459e-05
Abcd2	1.74371e-09	0.607747	0.278	0.128	4.31097e-05
Nceh1	2.04925e-09	0.521656	0.164	0.052	5.06637e-05
Gab2	2.75793e-09	0.378824	0.861	0.731	6.81843e-05
Osbpl8	3.84133e-09	0.603566	0.49	0.317	9.49693e-05
Gna12	3.9906e-09	0.481449	0.502	0.308	9.86595e-05
Kif13b	4.47476e-09	0.624059	0.461	0.294	0.000110629
Gm13710	4.69889e-09	0.526031	0.369	0.201	0.000116171
Nkain2	5.42064e-09	-0.418886	0.752	0.781	0.000134014
Dtnbp1	5.75981e-09	0.53863	0.271	0.124	0.0001424
Selplg	5.90688e-09	-0.52504	0.448	0.563	0.000146036
Gm5086	6.38429e-09	0.497958	0.446	0.263	0.000157839
Atp6v1a	1.10048e-08	0.474692	0.236	0.104	0.000272072
Tecpr1	1.25727e-08	0.51988	0.213	0.087	0.000310834
Tec	1.34821e-08	0.472483	0.387	0.217	0.000333317
Apbb2	1.53917e-08	0.487883	0.412	0.236	0.000380528
2900089D17Rik	1.63809e-08	0.494706	0.144	0.043	0.000404984
Cerk	1.66876e-08	0.4435	0.571	0.377	0.000412568
Ptgds	1.88259e-08	-0.814546	0.112	0.211	0.000465433
Csf1	1.90546e-08	0.635007	0.104	0.021	0.000471087
Asap1	2.02818e-08	0.344226	0.82	0.663	0.000501426
Mroh1	2.42932e-08	0.44851	0.301	0.149	0.0006006
Cd84	2.68561e-08	0.482052	0.474	0.288	0.000663964
Cd83	2.94475e-08	0.471618	0.132	0.037	0.000728032
Renbp	3.12979e-08	0.469682	0.186	0.07	0.000773779
Tnfrsf11a	3.17182e-08	0.461236	0.474	0.302	0.00078417
Myo5a	3.31011e-08	0.401473	0.476	0.296	0.000818358
P2rx4	3.7173e-08	0.485966	0.318	0.172	0.000919029
Vac14	4.15239e-08	0.410038	0.167	0.06	0.00102659
2510009E07Rik	4.46113e-08	0.520232	0.227	0.101	0.00110292
Flcn	4.66885e-08	0.461012	0.229	0.101	0.00115428
Oxct1	4.84293e-08	0.44847	0.459	0.286	0.00119732
AU020206	4.94727e-08	0.391769	0.162	0.056	0.00122311
Soat1	5.13718e-08	0.47278	0.249	0.118	0.00127007
Lactb2	7.31873e-08	0.520566	0.182	0.075	0.00180941
Bri3	1.01804e-07	0.449029	0.237	0.11	0.00251691
Usp48	1.04537e-07	0.375277	0.341	0.184	0.00258446
Fyb	1.71612e-07	0.371866	0.796	0.66	0.00424277
Gng12	1.76572e-07	0.526609	0.366	0.215	0.0043654
Dhrs3	2.19994e-07	0.463295	0.266	0.139	0.00543891
Plekhm3	2.35357e-07	0.38014	0.286	0.147	0.00581873
Plin2	2.39431e-07	0.481776	0.151	0.056	0.00591944
Runx1	2.43869e-07	0.35634	0.78	0.634	0.00602917
Frrs1	2.57829e-07	0.308722	0.26	0.126	0.00637431
Sipa1l2	3.04666e-07	0.312692	0.51	0.323	0.00753226
Akr1a1	3.88602e-07	0.423657	0.269	0.139	0.0096074
Appl2	4.25219e-07	0.443427	0.326	0.182	0.0105127
Tpd52	4.65005e-07	0.404734	0.28	0.149	0.0114963
Npl	4.86886e-07	0.45228	0.263	0.137	0.0120373
Nfe2l2	4.94286e-07	0.503873	0.314	0.178	0.0122202
Hpgds	5.12541e-07	0.353555	0.799	0.665	0.0126716
Elk3	5.2878e-07	0.350451	0.425	0.257	0.013073
Csf1r	5.45659e-07	-0.331535	0.859	0.867	0.0134903
Ralgapa2	5.4683e-07	0.469077	0.277	0.149	0.0135193
Fbxw4	6.02802e-07	0.395259	0.363	0.215	0.0149031
Kansl1l	6.26112e-07	0.427895	0.427	0.267	0.0154794
Mgmt	6.71675e-07	0.488212	0.187	0.085	0.0166058
Neat1	7.32394e-07	0.326301	0.339	0.195	0.018107
AC149090.1	7.98844e-07	0.325041	0.862	0.752	0.0197498
Lgmn	8.356e-07	0.275214	0.9	0.764	0.0206585
Gm35188	8.71035e-07	-0.530755	0.363	0.445	0.0215346
Ranbp9	9.02581e-07	0.36688	0.358	0.205	0.0223145
Lhfpl2	9.12477e-07	0.459023	0.354	0.211	0.0225592
Smyd3	1.001e-06	0.288679	0.569	0.395	0.0247477
C1qc	1.02577e-06	-0.436306	0.574	0.611	0.02536
Gm46367	1.0625e-06	-0.6352	0.293	0.379	0.0262683
Tspan9	1.068e-06	0.446967	0.198	0.093	0.0264042
Ddx60	1.06914e-06	0.4577	0.265	0.147	0.0264324
Ogdh	1.09549e-06	0.296789	0.279	0.149	0.0270839
mt-Nd4	1.19549e-06	-0.643155	0.069	0.145	0.029556
Wdfy4	1.41241e-06	0.367541	0.369	0.219	0.0349189
Erbb4	1.52821e-06	-0.492183	0.574	0.611	0.037782
Osbpl1a	1.58429e-06	0.369161	0.223	0.112	0.0391684
Fgf13	1.68107e-06	0.514607	0.496	0.344	0.041561
Ank	1.68951e-06	0.503353	0.245	0.13	0.0417698
Magi1	1.69248e-06	0.410852	0.548	0.391	0.0418432
Slco2b1	1.79379e-06	-0.334111	0.637	0.708	0.0443479
Kcnq1ot1	2.05223e-06	0.394547	0.392	0.244	0.0507373
Stx6	2.06086e-06	0.354584	0.175	0.077	0.0509507
Tgfa	2.36554e-06	0.4135	0.267	0.145	0.0584831
Sfmbt1	2.50954e-06	0.327598	0.491	0.321	0.0620434
Slc9a9	2.56099e-06	0.265447	0.879	0.82	0.0633154
Pi4ka	2.67876e-06	0.381807	0.292	0.161	0.0662269
Abcg1	2.72418e-06	0.396788	0.166	0.072	0.0673499
Akap10	2.79737e-06	0.377051	0.496	0.337	0.0691595
Igf1r	2.84427e-06	0.320149	0.543	0.371	0.0703189
Stx8	2.94216e-06	0.388995	0.376	0.234	0.0727391
Tmem119	3.13638e-06	-0.59561	0.186	0.273	0.0775407
Cdk8	3.54784e-06	0.304211	0.574	0.393	0.0877133
Eif4g3	3.76034e-06	0.304586	0.675	0.505	0.0929668
Gm40645	4.01458e-06	0.361924	0.217	0.108	0.0992524
Aig1	4.08216e-06	0.501955	0.301	0.182	0.100923
Ints6l	4.23661e-06	0.352403	0.747	0.615	0.104742
Nol4l	4.24219e-06	0.391056	0.266	0.147	0.10488
Ncoa3	4.79016e-06	0.347794	0.484	0.321	0.118427
Rnf130	4.806e-06	0.266399	0.482	0.302	0.118819
Arsb	4.83477e-06	0.373036	0.615	0.462	0.11953
Gm40841	5.2061e-06	0.337122	0.231	0.118	0.12871
Sat1	5.66095e-06	0.380562	0.419	0.271	0.139956
Akirin1	5.66536e-06	0.358261	0.149	0.062	0.140065
Sparc	5.67824e-06	-0.532926	0.388	0.46	0.140383
Wdr7	6.02875e-06	0.334638	0.34	0.205	0.149049
Rap2a	6.19674e-06	0.347644	0.231	0.122	0.153202
Prkch	6.2392e-06	0.374713	0.264	0.147	0.154252
Cmip	6.38666e-06	0.267413	0.645	0.46	0.157897
Trf	6.49986e-06	-0.534366	0.253	0.333	0.160696
Btaf1	7.36929e-06	0.302493	0.431	0.275	0.182191
Scaf11	7.46495e-06	0.337667	0.333	0.197	0.184556
mt-Co1	8.07669e-06	-0.622925	0.134	0.213	0.19968
Arhgap19	8.16619e-06	0.343073	0.127	0.05	0.201893
Ddhd1	8.20534e-06	0.291116	0.257	0.141	0.202861
Wwox	8.24498e-06	0.366581	0.553	0.41	0.203841
Tmem87b	8.33076e-06	0.387908	0.346	0.215	0.205962
Cpq	8.34586e-06	0.340033	0.254	0.143	0.206335
Snhg11	8.44121e-06	-0.364778	0.695	0.71	0.208692
Abcg3	8.46094e-06	0.498495	0.154	0.07	0.20918
Golga4	8.9307e-06	0.325151	0.326	0.199	0.220794
C1qb	9.01168e-06	-0.376656	0.492	0.542	0.222796
Pid1	9.55674e-06	0.382124	0.709	0.582	0.236271
Slc2a9	9.67083e-06	0.336335	0.111	0.039	0.239092
Irf8	1.06305e-05	0.358661	0.434	0.282	0.262818
Tgfbr1	1.07522e-05	-0.437461	0.727	0.704	0.265826
Ddx31	1.08414e-05	0.337648	0.179	0.087	0.268032
Tbc1d12	1.10033e-05	0.34508	0.231	0.124	0.272036
Fbxw11	1.11426e-05	0.317141	0.343	0.203	0.275477
Pfkfb3	1.14392e-05	0.271624	0.211	0.106	0.282811
Wdpcp	1.21059e-05	0.332975	0.19	0.093	0.299294
Rragc	1.25861e-05	0.296473	0.18	0.087	0.311167
Rasgef1b	1.26436e-05	0.367061	0.182	0.089	0.312589
Fndc3b	1.26993e-05	0.321663	0.413	0.271	0.313965
Atp6v0d1	1.28115e-05	0.360493	0.245	0.139	0.316739
Zfp346	1.30419e-05	0.377989	0.131	0.056	0.322435
Gatad2a	1.31726e-05	0.381252	0.19	0.097	0.325666
Stox2	1.44317e-05	0.565819	0.286	0.178	0.356795
Cnrip1	1.56174e-05	0.593904	0.177	0.091	0.386108
Sptlc2	1.56951e-05	0.346404	0.312	0.19	0.38803
Gm26714	1.5755e-05	0.368772	0.107	0.039	0.38951
Plgrkt	1.58515e-05	0.318097	0.291	0.17	0.391897
Eepd1	1.61392e-05	0.381623	0.156	0.072	0.39901
Tent4b	1.7671e-05	0.351425	0.277	0.161	0.43688
Cd81	1.78217e-05	-0.440814	0.261	0.337	0.440605
Lilrb4a	1.80784e-05	0.352377	0.119	0.048	0.446952
Zdhhc14	1.84429e-05	0.282329	0.725	0.578	0.455965
Ets1	1.85959e-05	-0.499466	0.107	0.182	0.459746
Vti1a	1.86939e-05	0.373425	0.56	0.42	0.462169
Sash1	1.92858e-05	0.432815	0.317	0.203	0.476803
Rab11fip5	1.98262e-05	0.342114	0.185	0.093	0.490163
Arhgef11	2.03911e-05	0.30034	0.342	0.209	0.504128
Arhgef40	2.0631e-05	-0.571456	0.2	0.271	0.510061
Slc46a3	2.08188e-05	0.315782	0.202	0.104	0.514703
Hif1a	2.09822e-05	0.338508	0.198	0.101	0.518742
Slf2	2.12711e-05	0.250382	0.35	0.211	0.525885
Mobp	2.12914e-05	-0.532825	0.392	0.447	0.526388
Tmem65	2.1426e-05	0.356768	0.161	0.077	0.529716
Stab1	2.1432e-05	0.256349	0.683	0.528	0.529862
Metap1d	2.48646e-05	0.303146	0.266	0.153	0.614727
Inpp4a	2.52993e-05	0.352218	0.246	0.143	0.625474
Mtf2	2.53478e-05	0.332064	0.21	0.112	0.626674
Man1a	2.61101e-05	-0.4062	0.48	0.526	0.64552
Secisbp2	2.7244e-05	0.29707	0.19	0.095	0.673553
Elf2	2.79171e-05	0.381685	0.368	0.238	0.690193
Hk2	2.91342e-05	0.285095	0.426	0.28	0.720285
mt-Nd2	2.93205e-05	-0.525112	0.046	0.101	0.72489
Znrf3	2.95183e-05	0.329149	0.237	0.133	0.729782
Tmem104	3.00476e-05	0.339905	0.289	0.172	0.742866
Gns	3.06802e-05	0.31598	0.501	0.354	0.758507
Lrp5	3.13931e-05	0.294904	0.334	0.207	0.776131
Ecpas	3.16174e-05	0.294024	0.428	0.286	0.781678
Cfh	3.23265e-05	-0.373056	0.583	0.617	0.799208
Ctsd	3.27214e-05	0.309087	0.714	0.567	0.808971
5033421B08Rik	3.33726e-05	0.561644	0.156	0.079	0.825072
Hpcal1	3.44696e-05	0.355518	0.152	0.072	0.852193
Tbc1d22a	3.47981e-05	0.306425	0.537	0.383	0.860314
Prkcb	3.83837e-05	0.292522	0.552	0.398	0.94896
Atp1b3	4.14417e-05	0.313527	0.216	0.118	1
Caprin1	4.18634e-05	0.264888	0.32	0.195	1
Kansl1	4.30336e-05	0.259182	0.764	0.615	1
Cotl1	4.38712e-05	0.342366	0.304	0.186	1
Canx	4.48184e-05	0.274144	0.331	0.207	1
Rnf166	4.58481e-05	0.28417	0.188	0.097	1
Lpin1	4.69335e-05	0.328684	0.136	0.062	1
Rhoh	4.73399e-05	0.299192	0.321	0.199	1
Col4a3bp	5.19077e-05	0.304861	0.279	0.164	1
Atxn10	5.207e-05	0.305127	0.338	0.213	1
Il10rb	5.28624e-05	0.277387	0.219	0.122	1
Nrp2	5.48129e-05	0.271006	0.257	0.149	1
Snx30	5.77223e-05	0.275685	0.406	0.269	1
Hps5	5.82295e-05	0.322791	0.138	0.064	1
Fam219a	5.92629e-05	0.32326	0.282	0.176	1
Ptpra	6.37085e-05	0.299006	0.559	0.412	1
Tsc1	6.39524e-05	0.256349	0.2	0.106	1
Scly	6.49387e-05	0.311145	0.109	0.043	1
Rbm47	6.69336e-05	0.302857	0.606	0.455	1
Tom1	6.75249e-05	0.323553	0.187	0.099	1
Khdrbs1	6.97032e-05	0.279333	0.413	0.275	1
Adipor1	7.4271e-05	0.372916	0.167	0.087	1
Arfgef2	7.56501e-05	0.397998	0.269	0.168	1
Sdcbp	8.24625e-05	0.293108	0.249	0.145	1
Memo1	8.28009e-05	0.287734	0.293	0.18	1
Eif4ebp2	8.59348e-05	0.314319	0.159	0.079	1
Scarb2	8.78272e-05	0.304735	0.299	0.188	1
Lmo2	8.80161e-05	0.298952	0.273	0.166	1
Rab27a	8.91651e-05	0.35595	0.122	0.054	1
Abl2	9.26311e-05	0.319678	0.384	0.259	1
Reps2	9.3964e-05	0.383473	0.198	0.114	1
Nsmce2	9.54748e-05	0.276603	0.427	0.302	1
Phtf2	9.7461e-05	0.315187	0.19	0.104	1
Kmt2e	0.000101605	0.270638	0.555	0.395	1
Tfeb	0.000112637	0.281978	0.207	0.116	1
Pld3	0.000116548	0.280046	0.132	0.062	1
Ppard	0.000126119	0.25448	0.289	0.176	1
Pmm2	0.000130352	0.254259	0.137	0.066	1
Hvcn1	0.000130452	0.259058	0.103	0.041	1
Slc37a2	0.000133634	0.358856	0.17	0.091	1
Rab2a	0.000135978	0.292038	0.354	0.234	1
Stx7	0.000139	0.282939	0.284	0.176	1
Eif2ak2	0.000139676	0.269299	0.179	0.097	1
Nktr	0.000140154	0.29876	0.504	0.364	1
Vps35l	0.000141123	0.266756	0.308	0.201	1
Dpp10	0.000141489	0.349919	0.482	0.348	1
Sytl2	0.000144592	-0.51405	0.118	0.182	1
Trafd1	0.000145073	0.264329	0.227	0.135	1
Slc17a5	0.000149814	0.256883	0.228	0.135	1
Gnpda1	0.000161639	0.292465	0.138	0.068	1
Pign	0.000162218	0.264132	0.228	0.135	1
Rab1a	0.000165516	0.257367	0.291	0.182	1
Sncaip	0.000167652	0.289215	0.217	0.126	1
Xist	0.000168284	0.294696	0.654	0.567	1
Fbxl20	0.000172224	0.301513	0.389	0.263	1
Ide	0.000176607	0.276655	0.124	0.058	1
Clcn7	0.000178028	0.314334	0.157	0.083	1
Slc44a1	0.000179657	0.318772	0.186	0.104	1
Nagk	0.00018038	0.306083	0.198	0.114	1
Rassf3	0.000180832	0.342996	0.163	0.087	1
Cabin1	0.000195888	0.27054	0.206	0.12	1
Rasa3	0.000196257	0.273352	0.305	0.195	1
Eprs	0.000205841	0.266526	0.161	0.085	1
Sntb2	0.000210145	0.278792	0.148	0.077	1
Upf2	0.000218536	0.257262	0.271	0.172	1
Cux1	0.000220508	0.273895	0.655	0.505	1
Csde1	0.000221086	0.304245	0.312	0.201	1
Mylip	0.000228005	0.315396	0.433	0.3	1
Reep5	0.000235587	-0.434772	0.137	0.203	1
Bcas3	0.000240336	0.253386	0.511	0.383	1
Ehbp1l1	0.000247347	0.253535	0.141	0.07	1
Myo9b	0.000250197	0.279916	0.352	0.236	1
Zmiz1	0.000257324	0.293978	0.578	0.435	1
Gapvd1	0.000264933	0.297463	0.52	0.381	1
Arap2	0.000277246	0.256787	0.177	0.101	1
Rtn3	0.000295811	0.262783	0.535	0.404	1
2810004N23Rik	0.000301083	0.252327	0.101	0.043	1
Trappc8	0.00030597	0.252902	0.38	0.255	1
Lcp1	0.00031802	0.286281	0.365	0.255	1
Pofut1	0.000323934	0.261362	0.126	0.062	1
Ptk2b	0.00032524	0.259066	0.186	0.104	1
Ints4	0.000335116	0.259742	0.109	0.05	1
Fmnl2	0.000343178	0.268938	0.429	0.302	1
Arap1	0.000353747	0.287096	0.18	0.104	1
Tnks2	0.000364697	0.272208	0.409	0.29	1
Prkcd	0.000367742	0.264153	0.468	0.329	1
Txndc16	0.000373159	0.260825	0.206	0.124	1
Egfr	0.000388541	-0.509533	0.089	0.147	1
Pced1b	0.000404372	0.251512	0.162	0.089	1
Nr6a1	0.000429237	-0.519487	0.313	0.364	1
Cadm1	0.000436182	0.380151	0.496	0.377	1
Unk	0.000437926	0.270856	0.194	0.114	1
Ank3	0.000453278	-0.329849	0.457	0.501	1
Sema6a	0.00047969	-0.332612	0.216	0.288	1
Dnajb14	0.00049799	0.250481	0.201	0.12	1
Bank1	0.000511928	-0.390447	0.325	0.389	1
Gm46224	0.000533692	0.251952	0.117	0.058	1
Ctsl	0.000548414	0.287143	0.281	0.182	1
Erbin	0.000558591	0.282477	0.54	0.404	1
Nav3	0.000575541	-0.259674	0.707	0.745	1
Mcph1	0.0005876	0.28187	0.181	0.108	1
Lrpprc	0.000595976	0.315683	0.206	0.126	1
Csmd3	0.000617427	-0.463008	0.478	0.505	1
P4ha1	0.000645794	0.305027	0.359	0.251	1
Adcy7	0.000661477	0.254413	0.406	0.294	1
Fyco1	0.000690608	0.272131	0.228	0.143	1
Atxn1	0.000697688	0.323772	0.632	0.513	1
Pstpip2	0.000709149	-0.557932	0.115	0.172	1
Rin2	0.000714494	0.259364	0.438	0.317	1
Ctsa	0.000726643	0.282087	0.377	0.259	1
Tsc22d3	0.000744334	-0.399649	0.092	0.149	1
St3gal6	0.000753088	-0.387262	0.434	0.472	1
1700025G04Rik	0.00076479	0.334782	0.128	0.068	1
Arhgap5	0.000771138	-0.348501	0.501	0.528	1
Fam91a1	0.000772251	0.274783	0.282	0.184	1
F630028O10Rik	0.000785947	-0.5417	0.085	0.139	1
Znrf2	0.000794055	0.277377	0.3	0.201	1
Nos1ap	0.00080623	-0.412676	0.25	0.308	1
Atp6v1b2	0.000876249	0.272288	0.28	0.186	1
Ly6e	0.000950246	-0.434352	0.174	0.236	1
Inpp5b	0.0010359	0.25074	0.123	0.064	1
Ctns	0.00104376	0.258905	0.102	0.05	1
Phf20	0.00113283	0.281677	0.44	0.329	1
Fam102b	0.00118914	-0.398077	0.277	0.333	1
Myo1d	0.00123703	-0.418009	0.152	0.211	1
Ube2l3	0.00127493	0.256918	0.167	0.099	1
Vav3	0.00129648	-0.695645	0.147	0.201	1
Slc12a2	0.00134164	0.273771	0.406	0.296	1
Ankrd27	0.00135626	0.263921	0.141	0.081	1
9630013A20Rik	0.00144675	-0.457095	0.281	0.329	1
Trim37	0.00149189	0.26636	0.107	0.056	1
Psd3	0.00158796	-0.495079	0.273	0.325	1
Pten	0.00164158	-0.370495	0.444	0.476	1
Arhgef6	0.00164229	0.268182	0.226	0.147	1
Magi2	0.0016466	-0.321077	0.489	0.509	1
Aak1	0.00183893	0.256311	0.414	0.311	1
Tnpo1	0.00184703	0.252269	0.367	0.265	1
Lifr	0.00194086	-0.455857	0.204	0.265	1
Ptprk	0.00197889	-0.538065	0.181	0.238	1
Stk39	0.0020371	-0.463168	0.076	0.122	1
Rad51b	0.00208285	0.348276	0.214	0.143	1
Mrc1	0.00217399	-0.594378	0.472	0.304	1
Scaper	0.00221241	0.250498	0.347	0.248	1
Ube3c	0.00229138	0.269276	0.354	0.251	1
Ikzf2	0.00236679	-0.323595	0.084	0.133	1
Mrps9	0.00242236	0.27235	0.124	0.07	1
Prkg1	0.00244431	0.352317	0.376	0.284	1
Gab3	0.00280042	0.319457	0.212	0.141	1
Mctp1	0.00288067	-0.692966	0.473	0.484	1
Kat2b	0.0029804	0.253367	0.304	0.215	1
Unc5c	0.00323002	-0.367035	0.289	0.337	1
Itga4	0.00326969	0.258778	0.132	0.079	1
Vrk2	0.00327686	0.274851	0.34	0.244	1
Auts2	0.00351704	-0.344825	0.537	0.542	1
Dock6	0.0036099	0.27476	0.136	0.081	1
Ccr5	0.0036427	-0.378561	0.308	0.36	1
Dlc1	0.00403652	-0.44139	0.223	0.269	1
Adamts16	0.00424662	0.272971	0.149	0.091	1
Slc24a2	0.00444104	-0.341048	0.283	0.329	1
Exoc6b	0.00463614	-0.266217	0.506	0.526	1
Gjc3	0.00484975	-0.367114	0.103	0.147	1
Tbc1d9	0.00495148	0.266547	0.357	0.267	1
Gm4951	0.00530918	-0.385177	0.062	0.101	1
Sema4a	0.00598962	-0.32943	0.063	0.101	1
Sugct	0.00599201	0.258137	0.1	0.056	1
Colec12	0.00604952	-0.548767	0.123	0.172	1
Kcnc2	0.00606537	0.294288	0.191	0.13	1
Stxbp6	0.00676711	-0.343091	0.091	0.135	1
Mdfic	0.00753414	0.250583	0.118	0.072	1
Atg7	0.00926084	0.306962	0.204	0.145	1
Sv2a	0.00951918	-0.397197	0.077	0.114	1
Ano4	0.0105175	-0.391543	0.121	0.159	1
Olfml3	0.0111413	-0.372048	0.162	0.201	1
Ptgs1	0.011593	-0.325506	0.34	0.36	1
Rbm26	0.0120031	-0.254752	0.536	0.542	1
Cdh23	0.012142	-0.437158	0.352	0.371	1
Pde7b	0.0134772	-0.586247	0.166	0.211	1
Mog	0.0137962	-0.462404	0.159	0.199	1
Tmem176b	0.0147072	-0.284257	0.084	0.12	1
Gpc6	0.0169797	-0.506357	0.227	0.261	1
1700047M11Rik	0.0180752	-0.361095	0.09	0.124	1
E230029C05Rik	0.0181665	-0.292972	0.347	0.383	1
Tmc7	0.0192811	-0.37342	0.09	0.124	1
Apoe	0.0197459	0.429451	0.731	0.681	1
St18	0.0197899	-0.393589	0.258	0.288	1
Gm31243	0.0207606	-0.303493	0.117	0.155	1
Cfap74	0.0214616	-0.382144	0.178	0.209	1
Pde4b	0.0218382	-0.379252	0.548	0.52	1
Eps8	0.0219008	-0.285827	0.154	0.195	1
Cpe	0.0220581	-0.292598	0.261	0.296	1
Itsn1	0.0220896	-0.434928	0.246	0.282	1
Prkce	0.022987	-0.25997	0.346	0.377	1
Ftl1	0.0241155	0.30747	0.187	0.13	1
Rogdi	0.0256489	-0.308826	0.194	0.23	1
Myo1b	0.0265738	-0.366958	0.094	0.126	1
Tapbp	0.0266453	-0.257638	0.074	0.106	1
Itch	0.0266638	-0.258161	0.515	0.513	1
Fhit	0.0269549	-0.25407	0.4	0.433	1
Lhfp	0.0270737	-0.277303	0.071	0.101	1
Scd2	0.0274974	-0.278562	0.138	0.172	1
Cmklr1	0.030117	-0.308757	0.15	0.182	1
Oip5os1	0.0303136	-0.296455	0.125	0.159	1
Slc6a1	0.0311157	-0.342534	0.103	0.135	1
Cers2	0.0311734	-0.322838	0.097	0.128	1
Samd4	0.0318612	0.258829	0.214	0.164	1
Mir142hg	0.0321266	-0.365055	0.236	0.261	1
Cables1	0.0330546	-0.295628	0.293	0.317	1
Ap1s2	0.0370264	-0.286053	0.098	0.128	1
Ckb	0.0373418	-0.334215	0.35	0.35	1
Plxnb2	0.0382655	-0.353648	0.256	0.275	1
Ptn	0.038768	-0.369128	0.277	0.298	1
Ppp1r21	0.0390338	-0.252532	0.301	0.315	1
Plekhg5	0.0414602	-0.367948	0.203	0.236	1
Il18	0.0417954	-0.353621	0.153	0.184	1
Hgsnat	0.0423096	-0.518059	0.097	0.126	1
Acsl3	0.0450406	-0.305895	0.182	0.211	1
Sipa1	0.0452918	-0.281919	0.295	0.306	1
Tgfbi	0.0453025	-0.322991	0.087	0.116	1
Cdc37l1	0.0466551	-0.383502	0.306	0.317	1
Mcc	0.0472933	-0.260396	0.084	0.114	1
Kcnk12	0.0528108	-0.293062	0.099	0.126	1
Ccdc107	0.0542975	-0.274944	0.075	0.101	1
Stxbp3	0.0561416	-0.315873	0.205	0.232	1
Gabbr1	0.0566713	-0.289313	0.22	0.242	1
Gm42477	0.0594541	-0.316239	0.138	0.166	1
5330438D12Rik	0.0599268	-0.300401	0.329	0.346	1
Tubb2a	0.0605782	-0.289168	0.112	0.139	1
Mat2a	0.0613911	-0.340547	0.212	0.234	1
Cmtm6	0.0628752	-0.252266	0.125	0.153	1
Plxna4	0.0631912	-0.284565	0.44	0.439	1
9530059O14Rik	0.0656515	-0.278598	0.159	0.184	1
Bsg	0.0660166	-0.30272	0.099	0.124	1
Bbs9	0.0700403	-0.28337	0.24	0.263	1
P2rx7	0.0706442	-0.349639	0.397	0.4	1
Eif2a	0.071643	-0.302103	0.107	0.135	1
Aoah	0.0735695	-0.508601	0.163	0.19	1
Glul	0.0755988	-0.281276	0.221	0.242	1
Mapk10	0.0757614	-0.302417	0.162	0.188	1
Plekhg1	0.0788427	-0.305117	0.144	0.17	1
Cp	0.0791897	-0.360579	0.129	0.155	1
5730522E02Rik	0.0796541	-0.299063	0.112	0.139	1
Dennd2c	0.0799882	-0.257932	0.089	0.114	1
Naaladl2	0.0914257	-0.310499	0.145	0.17	1
Enpp2	0.0941282	-0.301021	0.283	0.292	1
Tjp1	0.0952018	-0.286547	0.397	0.402	1
Srsf7	0.096854	-0.301747	0.307	0.315	1
Pard3	0.107924	-0.263621	0.094	0.118	1
Rnf220	0.113351	-0.258272	0.238	0.253	1
Grid2	0.115178	-0.254159	0.442	0.431	1
Stard13	0.115476	-0.285343	0.086	0.108	1
Pcyt2	0.116634	-0.272113	0.244	0.257	1
Pik3r1	0.116672	-0.264359	0.453	0.424	1
Cntn1	0.119462	-0.301689	0.236	0.253	1
Vapb	0.120172	-0.251581	0.123	0.145	1
Grik2	0.129341	-0.315425	0.381	0.369	1
Dab2	0.135437	-0.343862	0.388	0.302	1
Kif21a	0.135627	-0.271754	0.141	0.161	1
Gpr155	0.135894	-0.254494	0.128	0.147	1
N4bp2l2	0.137266	-0.322252	0.242	0.251	1
Ephb1	0.138438	-0.261246	0.144	0.166	1
Unc79	0.141549	-0.250279	0.125	0.145	1
Alcam	0.143432	-0.383183	0.212	0.224	1
Epn2	0.146557	-0.251381	0.165	0.184	1
B430010I23Rik	0.146774	-0.310292	0.225	0.234	1
Asb2	0.147009	-0.25658	0.148	0.168	1
A830008E24Rik	0.151445	-0.284364	0.215	0.232	1
Trpm3	0.154654	-0.573517	0.501	0.478	1
Iffo1	0.155082	-0.296359	0.267	0.273	1
App	0.156971	-0.321998	0.392	0.373	1
Phlpp1	0.16092	-0.280595	0.269	0.28	1
Nhsl2	0.170538	-0.274005	0.116	0.137	1
Shtn1	0.177441	-0.295084	0.084	0.101	1
Ptprg	0.179545	-0.367695	0.201	0.213	1
Rbfox2	0.180279	-0.283922	0.17	0.186	1
Dclk1	0.184133	-0.301345	0.289	0.292	1
Man2c1os	0.194914	-0.254749	0.094	0.112	1
Cnot7	0.196361	-0.251404	0.115	0.13	1
Fgf14	0.196806	-0.252302	0.454	0.431	1
Trim44	0.201541	-0.266929	0.255	0.259	1
Gm15489	0.218831	-0.273116	0.213	0.222	1
Atrnl1	0.231363	-0.291702	0.186	0.201	1
Etv1	0.232108	-0.296733	0.189	0.203	1
Map7	0.232388	-0.277816	0.187	0.199	1
Psip1	0.235909	-0.250085	0.181	0.19	1
Ctsc	0.24409	-0.307397	0.219	0.23	1
Cntnap2	0.246264	-0.307888	0.443	0.42	1
Rbpj	0.276061	-1.11099	0.396	0.354	1
Rmst	0.277923	-0.274582	0.094	0.108	1
Tuba1a	0.28006	-0.291136	0.17	0.18	1
Snhg20	0.28283	-0.256486	0.174	0.18	1
Sgcd	0.289978	-0.276466	0.163	0.176	1
A230057D06Rik	0.294293	-0.262382	0.219	0.224	1
Susd3	0.29688	-0.284917	0.172	0.178	1
St3gal2	0.298873	-0.262706	0.117	0.128	1
Ifi207	0.303313	-0.297199	0.088	0.101	1
Map4k2	0.303741	-0.25512	0.1	0.112	1
Ms4a6b	0.312972	-0.25575	0.157	0.17	1
Clcn5	0.31342	-0.25259	0.226	0.236	1
Trappc6b	0.318101	-0.265995	0.097	0.108	1
N4bp1	0.31814	-0.254429	0.164	0.174	1
Ttc19	0.3304	-0.29637	0.15	0.159	1
Ndufs1	0.399373	-0.255121	0.144	0.151	1
Snx2	0.422324	-0.258836	0.391	0.369	1
Trim35	0.483898	-0.256188	0.173	0.176	1
Sgip1	0.567153	-0.263207	0.177	0.151	1
Ap2a2	0.586069	-0.27532	0.308	0.292	1
Mir100hg	0.599248	-0.259083	0.254	0.24	1

## Sheet: Neurons
gene	p_val	avg_log2FC	pct.1	pct.2	p_val_adj
Xist	2.07278e-292	0.666778	0.662	0.341	5.12454e-288
mt-Co3	4.84898e-270	-0.70831	0.252	0.477	1.19881e-265
mt-Atp6	7.9126e-268	-0.711824	0.18	0.405	1.95623e-263
Gm42418	1.57323e-260	0.373554	0.996	0.998	3.8895e-256
Cmss1	1.64137e-259	0.453697	0.973	0.957	4.05797e-255
Tsix	1.84226e-228	0.482869	0.597	0.323	4.55462e-224
mt-Co2	7.53527e-223	-0.614844	0.182	0.381	1.86294e-218
Eif2s3y	9.06871e-162	-0.494984	0.187	0.36	2.24206e-157
Uty	4.93843e-149	-0.459056	0.181	0.346	1.22093e-144
mt-Cytb	1.82697e-134	-0.396015	0.105	0.241	4.51681e-130
mt-Co1	1.72522e-124	-0.426722	0.198	0.34	4.26526e-120
mt-Nd4	5.20015e-123	-0.407214	0.096	0.221	1.28563e-118
mt-Nd2	1.53567e-100	-0.349625	0.091	0.2	3.79663e-96
Ide	3.13544e-78	0.268047	0.326	0.197	7.75176e-74
mt-Nd1	6.58013e-76	-0.260988	0.071	0.156	1.62681e-71
Mobp	2.35501e-68	-0.546398	0.475	0.577	5.82228e-64
Plp1	7.24349e-68	-0.431782	0.652	0.728	1.79081e-63
Kdm5d	9.5939e-64	-0.263376	0.114	0.202	2.3719e-59
Gm26917	1.94256e-59	0.339128	0.803	0.715	4.80259e-55
Tmeff2	1.71205e-51	-0.385657	0.875	0.915	4.2327e-47
Nkain2	8.70544e-46	-0.295272	0.947	0.971	2.15225e-41
Dock10	2.88708e-40	-0.374282	0.67	0.718	7.13772e-36
Cdh19	2.01133e-34	-0.349111	0.184	0.254	4.97261e-30
Mbp	3.21248e-34	-0.415672	0.738	0.763	7.94223e-30
St18	1.87985e-32	-0.394454	0.406	0.476	4.64754e-28
Mog	2.42525e-32	-0.373975	0.288	0.361	5.99595e-28
Fgfr2	2.29018e-31	-0.290573	0.801	0.823	5.66201e-27
Aspa	6.50828e-29	-0.289013	0.172	0.237	1.60904e-24
Gm3764	2.02295e-28	0.339601	0.539	0.451	5.00133e-24
Gjc3	2.1923e-28	-0.29271	0.224	0.29	5.42002e-24
Sdk2	5.22589e-28	0.412971	0.332	0.258	1.292e-23
Prr5l	1.0905e-27	-0.302578	0.198	0.267	2.69605e-23
Stxbp6	1.18206e-25	-0.251882	0.394	0.455	2.92241e-21
Npas3	1.49248e-25	0.286787	0.596	0.514	3.68985e-21
Plekha1	5.06023e-22	-0.311584	0.481	0.51	1.25104e-17
Sec14l5	5.41211e-22	-0.267755	0.195	0.253	1.33804e-17
Pcdh9	1.2598e-21	-0.274406	0.985	0.988	3.1146e-17
Zfp536	2.22483e-21	-0.301988	0.496	0.549	5.50044e-17
Mast4	2.82543e-21	-0.254089	0.566	0.609	6.9853e-17
2610307P16Rik	5.33771e-21	0.477419	0.119	0.079	1.31964e-16
Ano4	4.15839e-20	-0.277231	0.543	0.577	1.02808e-15
Tspan2	7.50861e-20	-0.335328	0.27	0.319	1.85635e-15
Rnf220	2.30411e-19	-0.265338	0.402	0.447	5.69645e-15
Plcl1	2.64212e-19	-0.296552	0.625	0.657	6.53211e-15
Abhd17b	5.14659e-19	-0.250295	0.396	0.431	1.27239e-14
Sept7	3.29432e-18	-0.281282	0.568	0.591	8.14454e-14
Tiam2	4.98114e-18	0.252915	0.266	0.209	1.23149e-13
Phldb1	1.3807e-17	-0.302738	0.358	0.398	3.41352e-13
D7Ertd443e	1.94362e-17	-0.27793	0.191	0.237	4.80522e-13
Slc1a2	1.21161e-15	0.253393	0.631	0.557	2.99546e-11
Kcnd3	2.50534e-15	0.259722	0.515	0.452	6.19396e-11
Man1a	5.73979e-15	-0.27462	0.476	0.511	1.41905e-10
Qk	8.72339e-15	-0.264932	0.794	0.805	2.15668e-10
Ppp1r16b	8.8347e-15	-0.278293	0.458	0.477	2.1842e-10
Kndc1	2.04919e-14	-0.278753	0.398	0.426	5.06622e-10
Pak1	4.05444e-14	-0.279685	0.447	0.462	1.00238e-09
Map7	5.31253e-14	-0.259764	0.615	0.628	1.31342e-09
Robo2	4.25635e-12	0.308335	0.665	0.622	1.0523e-07
Pde4b	1.54333e-11	-0.262664	0.816	0.83	3.81557e-07
Nol4	4.40413e-11	0.253452	0.587	0.536	1.08883e-06

## Sheet: Oligos
gene	p_val	avg_log2FC	pct.1	pct.2	p_val_adj
Xist	1.41642e-79	0.765374	0.725	0.376	3.50183e-75
Tsix	1.34544e-71	0.571387	0.72	0.368	3.32634e-67
mt-Atp6	8.6485e-67	-0.707681	0.219	0.44	2.13817e-62
mt-Co3	1.38607e-65	-0.736392	0.28	0.485	3.42677e-61
mt-Co2	1.54506e-57	-0.629754	0.195	0.393	3.81985e-53
Eif2s3y	2.12222e-50	-0.607467	0.194	0.385	5.24676e-46
Uty	3.94576e-47	-0.551681	0.181	0.364	9.75511e-43
Gm26917	1.27866e-36	0.36206	0.978	0.944	3.16124e-32
mt-Cytb	7.99642e-35	-0.455786	0.118	0.251	1.97696e-30
Ddx3y	2.82823e-27	-0.38106	0.097	0.207	6.99224e-23
mt-Nd4	4.97998e-25	-0.37432	0.111	0.219	1.2312e-20
mt-Nd2	2.41115e-23	-0.339456	0.105	0.205	5.96109e-19
Gm4876	5.11294e-22	0.447278	0.421	0.283	1.26407e-17
AC149090.1	2.16014e-21	-0.518505	0.877	0.88	5.34051e-17
Lhfpl3	7.35676e-21	0.55348	0.489	0.348	1.81881e-16
mt-Co1	1.04004e-19	-0.406547	0.234	0.335	2.57128e-15
Ldlrad3	1.58852e-19	0.314501	0.389	0.258	3.92729e-15
9630013A20Rik	6.95983e-19	-0.282831	0.946	0.956	1.72068e-14
Dscaml1	6.99172e-19	0.470716	0.581	0.463	1.72856e-14
Dscam	1.87175e-17	0.275676	0.97	0.948	4.62753e-13
Ptprt	2.16625e-17	0.408111	0.564	0.439	5.35561e-13
Sox5	2.30262e-17	0.367021	0.49	0.356	5.69276e-13
Rin2	3.00935e-17	0.300517	0.38	0.256	7.44002e-13
Sema4d	6.60953e-17	-0.253082	0.918	0.931	1.63407e-12
mt-Nd1	1.03308e-16	-0.271397	0.08	0.156	2.55408e-12
Brinp3	1.16033e-16	0.373624	0.406	0.28	2.86869e-12
Ptprm	2.55838e-16	0.3183	0.528	0.398	6.32507e-12
Cdh13	3.46781e-16	0.390568	0.635	0.527	8.57346e-12
Ntm	3.74311e-16	0.345835	0.658	0.52	9.25409e-12
Galnt10	4.66641e-16	0.278855	0.213	0.121	1.15368e-11
Ptprz1	5.73602e-16	0.297654	0.636	0.5	1.41812e-11
Igsf9b	6.25338e-16	0.333837	0.441	0.323	1.54602e-11
Sh3bp4	6.61326e-16	0.293626	0.465	0.343	1.635e-11
Sema5b	1.7156e-15	0.345188	0.282	0.179	4.24148e-11
Npas3	2.4203e-15	0.320207	0.721	0.609	5.98371e-11
Ank2	8.23407e-15	0.276877	0.88	0.788	2.03571e-10
Syne1	1.04688e-14	0.298578	0.709	0.605	2.58821e-10
Adgrl3	1.37724e-14	0.333048	0.841	0.777	3.40494e-10
Prkcb	1.87382e-14	0.253416	0.664	0.537	4.63264e-10
Arsb	1.98788e-14	0.378598	0.366	0.26	4.91464e-10
Arhgap24	3.23125e-14	0.414656	0.547	0.434	7.98861e-10
Srgap1	5.07793e-14	0.264021	0.42	0.307	1.25542e-09
Nrcam	8.29582e-14	0.284286	0.595	0.473	2.05097e-09
Sox6	1.07229e-13	0.343338	0.679	0.587	2.65103e-09
Amz1	1.33197e-13	0.258945	0.179	0.102	3.29302e-09
Tmem132d	3.10714e-13	0.319202	0.575	0.475	7.68177e-09
Adgrb3	4.08984e-13	0.313892	0.764	0.676	1.01113e-08
Slc35f1	4.41816e-13	0.252483	0.459	0.347	1.0923e-08
Kdm5d	4.60787e-13	-0.257995	0.094	0.162	1.1392e-08
Nav3	6.30543e-13	0.288166	0.539	0.417	1.55889e-08
Slc24a3	1.34408e-12	0.371889	0.581	0.485	3.32297e-08
Ncam1	1.88584e-12	0.304261	0.939	0.902	4.66237e-08
Fgf14	3.2552e-12	0.250559	0.613	0.485	8.04782e-08
Ppp2r2b	3.60235e-12	0.287313	0.49	0.38	8.90608e-08
Sgcd	7.63517e-12	0.338772	0.36	0.263	1.88764e-07
Shisa4	8.622e-12	-0.254781	0.772	0.776	2.13162e-07
Nrg1	8.67418e-12	0.398544	0.628	0.504	2.14452e-07
Ptprg	1.832e-11	0.318738	0.569	0.468	4.52925e-07
Xylt1	1.87602e-11	0.270943	0.545	0.435	4.63807e-07
Fbn2	2.10967e-11	0.306991	0.486	0.385	5.21574e-07
Lrrtm4	2.19133e-11	0.352452	0.662	0.566	5.41762e-07
Ncald	2.57291e-11	0.290408	0.418	0.314	6.36101e-07
Dlgap1	5.82966e-11	0.274486	0.803	0.732	1.44127e-06
Ldlrad4	6.78383e-11	0.261603	0.459	0.354	1.67717e-06
Adam23	1.29915e-10	0.289495	0.471	0.369	3.21189e-06
Reep1	1.87405e-10	0.257774	0.316	0.229	4.6332e-06
Dmd	2.37707e-10	0.258277	0.639	0.544	5.87682e-06
Pcdh15	2.3973e-10	0.25566	0.518	0.414	5.92685e-06
Brinp1	2.84143e-10	0.31393	0.429	0.339	7.02487e-06
Gm13052	3.49833e-10	0.310196	0.669	0.581	8.64892e-06
Ptgds	5.34098e-10	-0.291718	0.148	0.212	1.32045e-05
Ctnna2	5.7516e-10	0.287439	0.85	0.785	1.42197e-05
Csmd3	7.71029e-10	0.266247	0.758	0.672	1.90621e-05
Chst11	7.91217e-10	0.261972	0.284	0.202	1.95613e-05
Cacng4	1.15915e-09	0.266914	0.21	0.14	2.86577e-05
Prkg1	2.58696e-09	0.26905	0.59	0.496	6.39575e-05
Rora	3.76144e-09	0.250431	0.655	0.551	9.29941e-05
Csmd1	4.20874e-09	0.250439	0.901	0.849	0.000104053
Nxph1	1.24137e-08	0.363772	0.378	0.297	0.000306903
Cst3	4.37202e-06	-0.318556	0.365	0.4	0.108089
1700042O10Rik	3.0394e-05	-0.263999	0.285	0.322	0.751431

## Sheet: Vascular
gene	p_val	avg_log2FC	pct.1	pct.2	p_val_adj
Gm42418	4.18602e-90	0.398062	0.999	0.996	1.03491e-85
Xist	1.88815e-77	0.685931	0.694	0.379	4.66807e-73
Zbtb16	1.85414e-73	-0.943633	0.199	0.426	4.58399e-69
Cmss1	1.95937e-73	0.490812	0.981	0.919	4.84416e-69
Adam12	2.27226e-53	-0.641283	0.475	0.679	5.61772e-49
Slc7a11	1.67465e-52	-0.840343	0.411	0.613	4.14024e-48
Fkbp5	1.68338e-50	-0.828836	0.237	0.421	4.16181e-46
Alcam	1.13424e-48	-0.82575	0.523	0.666	2.80418e-44
Sidt1	2.7292e-47	-0.808248	0.286	0.477	6.74741e-43
Tsix	6.3766e-46	0.436533	0.554	0.318	1.57649e-41
Mir100hg	5.95919e-43	-0.489286	0.685	0.793	1.47329e-38
Fry	1.26234e-42	0.671418	0.682	0.529	3.12088e-38
Malat1	5.17316e-42	-0.258126	1	1	1.27896e-37
Bmp6	6.63487e-42	-0.536253	0.441	0.642	1.64034e-37
Eng	1.36408e-41	0.674332	0.383	0.214	3.37241e-37
Slc24a3	2.16524e-41	-0.583778	0.509	0.659	5.35313e-37
Sned1	1.79431e-40	-0.611445	0.389	0.561	4.43608e-36
Ablim1	5.97571e-40	0.694182	0.436	0.271	1.47738e-35
Cobll1	8.398e-40	0.633474	0.547	0.376	2.07624e-35
Epas1	8.10354e-39	0.528246	0.464	0.281	2.00344e-34
Adgrl3	1.33424e-38	0.54783	0.776	0.632	3.29865e-34
Tmtc4	3.83319e-38	-0.67918	0.349	0.504	9.4768e-34
Apbb2	6.02646e-38	0.516758	0.732	0.583	1.48992e-33
Frmpd4	1.09095e-37	-0.603749	0.453	0.604	2.69714e-33
Itga4	1.97873e-37	0.606259	0.326	0.171	4.89201e-33
Nostrin	2.50594e-37	0.507743	0.267	0.123	6.19543e-33
Myo10	2.76884e-37	0.763761	0.484	0.319	6.84541e-33
Ptprb	6.77407e-37	0.909344	0.265	0.129	1.67475e-32
Slc6a13	1.74011e-36	-0.504627	0.438	0.618	4.30207e-32
Igfbp7	1.90686e-36	0.557399	0.495	0.318	4.71434e-32
Rasgrp3	2.9194e-36	0.528729	0.304	0.154	7.21763e-32
Mapk4	6.61126e-36	-0.689274	0.323	0.482	1.6345e-31
Fli1	8.25183e-36	0.702894	0.379	0.224	2.0401e-31
Morrbid	1.37192e-35	0.622348	0.381	0.219	3.3918e-31
Ptprg	1.6959e-35	0.769689	0.761	0.625	4.19278e-31
Ebf1	2.8369e-35	0.591413	0.631	0.48	7.01366e-31
Egfl7	2.07287e-34	0.834027	0.248	0.121	5.12475e-30
Ets1	4.39146e-34	0.598188	0.487	0.326	1.0857e-29
Slc6a20a	4.44618e-34	-0.433517	0.687	0.804	1.09923e-29
Pdzd2	7.95729e-34	0.427167	0.484	0.306	1.96728e-29
4930594M22Rik	1.13908e-33	-0.563649	0.396	0.551	2.81614e-29
Dgkh	2.46247e-33	0.548396	0.436	0.274	6.08797e-29
Col4a2	3.41728e-33	0.457132	0.59	0.422	8.44855e-29
Cdh2	2.24039e-32	0.54489	0.491	0.329	5.53892e-28
Mecom	2.29653e-32	0.82718	0.257	0.13	5.67772e-28
Acss3	4.4248e-32	-0.743488	0.178	0.311	1.09394e-27
Mical3	1.07067e-31	-0.553097	0.518	0.641	2.64703e-27
Cp	1.85705e-31	-0.652353	0.461	0.575	4.59119e-27
Itga1	1.9527e-31	0.557168	0.672	0.533	4.82767e-27
Abhd2	2.16245e-31	0.584717	0.421	0.271	5.34623e-27
Ttyh2	2.62567e-31	0.477238	0.291	0.154	6.49144e-27
Arhgap31	3.81614e-31	0.484705	0.614	0.462	9.43464e-27
Slc7a1	3.95468e-31	0.746656	0.284	0.154	9.77716e-27
Eya1	4.15681e-31	-0.52056	0.392	0.541	1.02769e-26
Flt1	6.03394e-31	0.927154	0.488	0.35	1.49177e-26
Lrmda	1.54031e-30	-0.620413	0.368	0.516	3.80812e-26
Kitl	1.70477e-30	0.550032	0.271	0.142	4.21471e-26
Adgrl4	1.95357e-30	0.71381	0.244	0.122	4.8298e-26
Cfh	2.78937e-30	-0.55697	0.405	0.543	6.89617e-26
Tek	1.10073e-29	0.574735	0.211	0.099	2.72132e-25
Fbn2	1.20236e-29	-0.812663	0.207	0.335	2.97259e-25
Ccdc141	1.50727e-29	0.52216	0.507	0.352	3.72643e-25
Naaladl2	1.92914e-29	-0.47726	0.491	0.631	4.76942e-25
Rgs3	1.96261e-29	0.424525	0.316	0.175	4.85216e-25
Pecam1	2.47641e-29	0.591285	0.203	0.094	6.12243e-25
Eogt	6.74896e-29	0.577306	0.274	0.149	1.66855e-24
Pakap.1	9.26765e-29	0.44616	0.565	0.407	2.29124e-24
Uty	1.4581e-28	-0.510226	0.165	0.298	3.60486e-24
Apoe	1.45824e-28	-0.537595	0.618	0.692	3.60522e-24
Col4a1	1.48469e-28	0.410626	0.588	0.43	3.67061e-24
Notch1	1.53561e-28	0.402823	0.311	0.176	3.79649e-24
Kdr	1.83776e-28	0.647281	0.232	0.12	4.5435e-24
Adgrf5	3.00129e-28	0.539587	0.278	0.153	7.42008e-24
Rgs5	3.27339e-28	0.531773	0.369	0.227	8.09281e-24
Robo1	3.60083e-28	-0.387024	0.589	0.716	8.90232e-24
Dach1	4.21439e-28	0.623524	0.41	0.266	1.04192e-23
Pip5k1b	4.87793e-28	0.466816	0.412	0.265	1.20597e-23
Bicc1	5.31338e-28	-0.491079	0.618	0.713	1.31363e-23
Robo4	6.30638e-28	0.371499	0.128	0.045	1.55913e-23
Slc1a3	7.05825e-28	-0.470318	0.558	0.679	1.74501e-23
Zfp536	7.18092e-28	-0.390893	0.491	0.636	1.77534e-23
Ptprm	7.22966e-28	0.6104	0.763	0.656	1.78739e-23
Myo1b	1.36034e-27	0.479496	0.648	0.517	3.36317e-23
Col4a5	1.94918e-27	-0.52998	0.315	0.454	4.81896e-23
Utrn	4.00418e-27	0.351399	0.881	0.798	9.89952e-23
Apod	4.00833e-27	-0.456761	0.383	0.528	9.90981e-23
Erg	6.50344e-27	0.507965	0.19	0.088	1.60785e-22
Cldn5	7.39791e-27	0.549243	0.251	0.131	1.82899e-22
Cyyr1	7.79415e-27	0.54848	0.192	0.089	1.92695e-22
Pald1	8.29711e-27	0.410061	0.311	0.179	2.05129e-22
Nos3	9.69873e-27	0.461517	0.15	0.061	2.39782e-22
Aox3	1.41076e-26	-0.620628	0.21	0.343	3.48782e-22
Afap1l2	1.91698e-26	0.40816	0.31	0.178	4.73934e-22
1700018A04Rik	2.00195e-26	0.37506	0.18	0.081	4.94943e-22
Dock9	2.17685e-26	0.411589	0.516	0.366	5.38182e-22
Podxl	2.74783e-26	0.463229	0.165	0.072	6.79345e-22
Slc16a1	4.20715e-26	0.758822	0.214	0.11	1.04013e-21
Agrn	4.49844e-26	0.404194	0.445	0.299	1.11215e-21
Elk3	5.7927e-26	0.410007	0.252	0.135	1.43213e-21
Dock4	6.73984e-26	0.605345	0.666	0.549	1.66629e-21
Sema6d	1.37681e-25	0.479336	0.571	0.421	3.40388e-21
Myh9	1.88136e-25	0.418238	0.512	0.364	4.65129e-21
Mcam	1.93659e-25	0.42712	0.257	0.139	4.78782e-21
Adgre5	2.00224e-25	0.411961	0.279	0.155	4.95015e-21
Ppard	3.1146e-25	0.439033	0.356	0.224	7.70023e-21
Aldh1a1	3.36018e-25	-0.580603	0.194	0.319	8.30736e-21
Vcam1	4.02245e-25	-0.656102	0.122	0.233	9.94471e-21
Parvb	6.989e-25	0.442529	0.2	0.098	1.72789e-20
Auts2	1.18785e-24	-0.287398	0.933	0.939	2.93672e-20
Pdgfb	1.20005e-24	0.482767	0.162	0.073	2.96689e-20
Rassf9	1.64023e-24	0.465549	0.168	0.076	4.05515e-20
Itpkb	1.93202e-24	0.449539	0.414	0.275	4.77654e-20
Fgfr2	1.99785e-24	-0.378955	0.722	0.77	4.93928e-20
Rcan2	2.93137e-24	-0.864999	0.124	0.227	7.24724e-20
Arhgef15	3.85492e-24	0.322354	0.117	0.043	9.53052e-20
St8sia4	4.82187e-24	0.411928	0.219	0.112	1.19211e-19
Ptk2	5.75981e-24	0.350401	0.787	0.68	1.424e-19
Emcn	5.98171e-24	0.374365	0.257	0.14	1.47886e-19
Ushbp1	6.84662e-24	0.41985	0.14	0.058	1.69269e-19
Stard13	7.76468e-24	0.341023	0.694	0.558	1.91966e-19
Fgd5	8.45225e-24	0.397726	0.181	0.086	2.08965e-19
Vwf	9.34688e-24	0.498942	0.129	0.051	2.31083e-19
Arap3	1.51439e-23	0.369957	0.178	0.084	3.74403e-19
Pik3r6	1.57814e-23	0.331053	0.11	0.039	3.90164e-19
Sptbn1	1.68582e-23	0.305042	0.931	0.868	4.16785e-19
Hmcn1	1.81277e-23	0.804649	0.276	0.167	4.4817e-19
Lims1	3.2238e-23	0.435944	0.625	0.504	7.9702e-19
Esam	5.42516e-23	0.424618	0.232	0.125	1.34126e-18
Tfrc	5.43495e-23	0.659999	0.26	0.153	1.34368e-18
Sgms1	5.63648e-23	0.409976	0.569	0.433	1.39351e-18
Slc7a5	5.70698e-23	0.564239	0.232	0.128	1.41094e-18
Eif2s3y	5.74545e-23	-0.504773	0.121	0.224	1.42045e-18
Lrp8	6.19035e-23	0.588848	0.231	0.129	1.53044e-18
Zfp366	7.37693e-23	0.494597	0.208	0.109	1.8238e-18
Dysf	7.8448e-23	0.365365	0.178	0.085	1.93947e-18
4931406P16Rik	8.14495e-23	0.414329	0.451	0.319	2.01368e-18
Kcnk2	8.73808e-23	-0.385634	0.413	0.556	2.16032e-18
Slco1c1	1.17943e-22	0.764409	0.326	0.213	2.91591e-18
Ddah1	1.55308e-22	0.381087	0.162	0.076	3.83968e-18
Sorbs2	1.56582e-22	0.542297	0.37	0.251	3.87117e-18
Prkch	1.97135e-22	0.441488	0.17	0.082	4.87376e-18
Coro2b	2.22721e-22	0.355612	0.366	0.233	5.50634e-18
Tbc1d1	2.62874e-22	0.373459	0.328	0.203	6.49905e-18
Tie1	3.0258e-22	0.334076	0.146	0.064	7.48069e-18
Slco2b1	4.47e-22	0.397779	0.211	0.112	1.10512e-17
Mbp	5.11818e-22	-0.433691	0.603	0.674	1.26537e-17
Abcb1a	6.15493e-22	0.432703	0.213	0.113	1.52168e-17
Rftn1	7.59575e-22	0.426422	0.262	0.153	1.8779e-17
Ltbp4	1.14933e-21	0.409779	0.212	0.115	2.8415e-17
Svep1	1.35363e-21	-0.466151	0.162	0.272	3.34657e-17
Adamts12	1.75031e-21	-0.555388	0.307	0.427	4.3273e-17
Celf2	1.75033e-21	-0.316445	0.804	0.833	4.32734e-17
Cd93	1.81805e-21	0.337299	0.118	0.047	4.49477e-17
Rhoj	1.91485e-21	0.428371	0.475	0.342	4.73407e-17
Prkag2	2.14656e-21	-0.298284	0.478	0.619	5.30694e-17
Mef2c	2.2213e-21	0.267306	0.446	0.306	5.49172e-17
Notch3	2.78701e-21	0.545242	0.335	0.219	6.89032e-17
Stab1	4.44281e-21	0.339015	0.108	0.041	1.0984e-16
Nav1	5.28581e-21	0.424718	0.49	0.364	1.30681e-16
Stx1a	5.45657e-21	0.352162	0.246	0.141	1.34903e-16
Rgs6	6.31389e-21	0.471853	0.415	0.289	1.56098e-16
Dcdc2a	7.4157e-21	-0.563762	0.38	0.484	1.83338e-16
Pde8a	8.73227e-21	0.389072	0.269	0.161	2.15888e-16
Slfn5	1.0431e-20	0.316273	0.135	0.06	2.57887e-16
Gjc1	1.51787e-20	0.399261	0.321	0.202	3.75264e-16
Trpm3	1.69955e-20	-0.444399	0.642	0.716	4.2018e-16
Thsd1	2.32234e-20	0.37095	0.206	0.112	5.74151e-16
Lrrc8d	2.40357e-20	0.339889	0.256	0.152	5.94234e-16
Scarf1	2.71913e-20	0.2688	0.15	0.07	6.72251e-16
Fn1	2.79191e-20	0.58119	0.335	0.224	6.90243e-16
Prkg1	2.90303e-20	0.430961	0.754	0.648	7.17716e-16
Cemip	2.93317e-20	-0.602185	0.188	0.301	7.25168e-16
Srgap1	3.33048e-20	0.444879	0.45	0.327	8.23395e-16
Shank3	3.73475e-20	0.470004	0.221	0.127	9.23343e-16
Ly75	4.28039e-20	0.417071	0.139	0.063	1.05824e-15
Dnajc6	4.3797e-20	-0.39	0.428	0.557	1.08279e-15
Rasip1	4.50742e-20	0.32853	0.122	0.052	1.11437e-15
Vcl	5.12599e-20	0.434192	0.485	0.36	1.2673e-15
Vwa1	5.57016e-20	0.371066	0.192	0.102	1.37711e-15
Afap1l1	5.65592e-20	0.373954	0.194	0.104	1.39831e-15
Fyn	7.42791e-20	0.401231	0.466	0.34	1.8364e-15
Pcdh9	1.06732e-19	-0.290587	0.925	0.933	2.63874e-15
Hip1	1.13945e-19	0.466225	0.548	0.426	2.81707e-15
Hif3a	1.14604e-19	-0.418413	0.081	0.167	2.83335e-15
Igfbp2	1.32031e-19	-0.468521	0.216	0.325	3.2642e-15
Pld1	1.39482e-19	-0.413589	0.525	0.61	3.44841e-15
Ednra	1.63492e-19	0.487734	0.286	0.179	4.04201e-15
Gsdme	1.8197e-19	-0.478718	0.302	0.41	4.49885e-15
Tmtc1	2.14599e-19	-0.39771	0.427	0.529	5.30552e-15
Bsg	2.17682e-19	0.590173	0.375	0.266	5.38175e-15
Fam13c	2.84296e-19	0.336217	0.341	0.225	7.02866e-15
Hspa12b	2.97889e-19	0.433827	0.203	0.113	7.3647e-15
Nxpe2	3.35936e-19	0.362364	0.124	0.055	8.30535e-15
Ccm2l	3.76867e-19	0.283258	0.107	0.043	9.31729e-15
Efr3b	4.43874e-19	0.543135	0.267	0.168	1.09739e-14
Peak1	6.34016e-19	0.316727	0.619	0.484	1.56748e-14
Dpyd	6.86501e-19	-0.374766	0.401	0.514	1.69724e-14
Dmd	8.76049e-19	0.456354	0.559	0.442	2.16586e-14
Tns1	8.92652e-19	0.295094	0.619	0.483	2.2069e-14
Gab1	1.35373e-18	0.30044	0.67	0.543	3.34682e-14
Cbfa2t3	1.38342e-18	0.298659	0.184	0.097	3.42022e-14
Lrrc8c	1.70707e-18	0.429344	0.241	0.146	4.22039e-14
Nes	1.97782e-18	0.296551	0.133	0.062	4.88977e-14
Pde4d	2.01035e-18	0.291	0.753	0.648	4.97019e-14
Fermt2	2.50076e-18	0.330854	0.55	0.42	6.18263e-14
Dennd3	2.56705e-18	0.369507	0.169	0.089	6.34651e-14
Ptpn13	3.11017e-18	-0.339218	0.472	0.58	7.68927e-14
Cd34	4.27824e-18	0.373448	0.133	0.063	1.05771e-13
Mcf2l	4.2892e-18	0.451485	0.219	0.13	1.06042e-13
Pik3r3	4.82555e-18	0.345817	0.456	0.338	1.19302e-13
Map3k20	5.14216e-18	0.340923	0.381	0.261	1.2713e-13
Kdm7a	5.42091e-18	-0.422714	0.384	0.484	1.34021e-13
Mir99ahg	6.37879e-18	-0.25147	0.818	0.871	1.57703e-13
Myo1e	6.49846e-18	0.49736	0.36	0.252	1.60661e-13
Palmd	8.03812e-18	0.426332	0.253	0.157	1.98727e-13
Col1a2	9.16887e-18	-0.423435	0.417	0.531	2.26682e-13
Mfsd2a	1.00871e-17	0.379376	0.178	0.097	2.49383e-13
Ank2	1.08666e-17	-0.266806	0.807	0.85	2.68655e-13
Tmeff2	1.09517e-17	-0.333482	0.681	0.734	2.70758e-13
Slc2a1	1.35614e-17	0.459406	0.213	0.125	3.35278e-13
Ptn	1.54932e-17	-0.289482	0.835	0.873	3.83037e-13
Lepr	1.60658e-17	-0.450299	0.281	0.387	3.97194e-13
Nomo1	1.67365e-17	0.319156	0.171	0.092	4.13776e-13
Rgs12	1.91273e-17	0.361406	0.261	0.165	4.72883e-13
Kank3	1.99975e-17	0.394907	0.212	0.125	4.94397e-13
Shroom3	2.68166e-17	-0.478489	0.151	0.244	6.62986e-13
Pde5a	2.84416e-17	0.433872	0.351	0.244	7.03161e-13
Itga6	2.85732e-17	0.443981	0.215	0.13	7.06416e-13
Nalcn	3.18019e-17	-0.419998	0.344	0.446	7.86239e-13
Far2	3.20779e-17	0.425621	0.152	0.079	7.93063e-13
Plxnd1	3.45243e-17	0.314774	0.146	0.074	8.53543e-13
Pdzrn3	3.49845e-17	-0.309218	0.572	0.678	8.64921e-13
Sema3c	4.15942e-17	0.448131	0.158	0.083	1.02833e-12
Ppm1e	4.28476e-17	-0.389713	0.464	0.555	1.05932e-12
Jag2	4.57993e-17	0.271914	0.131	0.063	1.1323e-12
Snta1	4.63659e-17	-0.426121	0.156	0.248	1.1463e-12
Map4k3	4.66894e-17	0.301939	0.506	0.382	1.1543e-12
Ptgds	5.27155e-17	-0.541351	0.426	0.533	1.30329e-12
Rassf3	5.70754e-17	0.292785	0.208	0.12	1.41107e-12
Btaf1	6.17608e-17	0.28474	0.45	0.327	1.52691e-12
Nova2	6.78657e-17	0.281236	0.149	0.076	1.67784e-12
Stard9	6.80749e-17	0.270109	0.55	0.416	1.68302e-12
Plxna2	7.19769e-17	-0.432753	0.54	0.61	1.77949e-12
Slc38a2	7.79501e-17	-0.367436	0.464	0.552	1.92716e-12
Plp1	8.18312e-17	-0.382486	0.592	0.65	2.02311e-12
Sipa1l2	8.42772e-17	0.313642	0.253	0.159	2.08359e-12
Magi1	9.30651e-17	0.42301	0.534	0.424	2.30085e-12
Gpcpd1	9.76695e-17	0.443728	0.698	0.602	2.41468e-12
Ece1	1.22116e-16	0.285353	0.337	0.225	3.01907e-12
Sox17	1.23977e-16	0.283518	0.117	0.053	3.06509e-12
Rflnb	1.34287e-16	0.287504	0.111	0.049	3.31997e-12
Nnat	1.37156e-16	-0.386002	0.381	0.491	3.3909e-12
Tmtc2	1.60015e-16	0.555249	0.368	0.267	3.95606e-12
Ddx3y	1.66572e-16	-0.397249	0.089	0.167	4.11816e-12
Lpar1	1.73034e-16	-0.315699	0.403	0.512	4.27793e-12
Stard8	1.81827e-16	0.303917	0.293	0.189	4.49531e-12
Git2	1.92157e-16	0.292494	0.405	0.287	4.7507e-12
Mpp6	1.98395e-16	-0.366913	0.415	0.521	4.90491e-12
Slc13a3	1.98873e-16	-0.371675	0.32	0.427	4.91675e-12
Klf12	2.04254e-16	0.322048	0.698	0.595	5.04978e-12
Sesn3	2.17216e-16	0.305033	0.317	0.213	5.37023e-12
Gnb4	3.0551e-16	0.26366	0.361	0.246	7.55312e-12
Lhfpl2	3.1519e-16	0.438809	0.435	0.333	7.79245e-12
Heg1	3.44074e-16	0.46667	0.571	0.469	8.50654e-12
Kcp	3.6867e-16	0.310312	0.19	0.108	9.11463e-12
Wwtr1	4.16636e-16	0.347185	0.58	0.463	1.03005e-11
Magi2	4.33964e-16	-0.302994	0.68	0.736	1.07289e-11
Itgb1	5.67834e-16	0.293991	0.522	0.404	1.40386e-11
Lyn	6.7039e-16	0.318687	0.363	0.254	1.65741e-11
Flnb	6.77074e-16	0.427108	0.38	0.278	1.67393e-11
Itgbl1	7.58809e-16	-0.446985	0.205	0.303	1.876e-11
Pitpnc1	8.34497e-16	0.362738	0.746	0.657	2.06313e-11
Tspan5	1.02403e-15	0.414802	0.624	0.53	2.53172e-11
Gjb6	1.15418e-15	-0.367526	0.212	0.306	2.85348e-11
Art3	1.17175e-15	0.363057	0.191	0.11	2.89693e-11
Myo1d	1.27386e-15	0.292154	0.282	0.184	3.14937e-11
Timp3	1.38373e-15	-0.376689	0.324	0.423	3.421e-11
Rbpms	1.40138e-15	0.278543	0.685	0.569	3.46462e-11
Lama2	1.408e-15	-0.34157	0.668	0.74	3.48099e-11
Limch1	1.42784e-15	0.445998	0.391	0.29	3.53004e-11
Id1	1.46723e-15	0.375335	0.174	0.098	3.62742e-11
Cspg4	1.53552e-15	0.323916	0.239	0.148	3.79626e-11
Atp10a	1.65625e-15	0.332161	0.226	0.139	4.09476e-11
Aebp1	1.82301e-15	-0.361933	0.192	0.288	4.50703e-11
Sema6a	1.90906e-15	0.360138	0.534	0.426	4.71977e-11
Mprip	2.11795e-15	0.262154	0.78	0.661	5.23622e-11
Psd3	2.34359e-15	0.288933	0.71	0.608	5.79405e-11
Actn1	2.3786e-15	0.286883	0.187	0.108	5.88062e-11
Rapgef5	2.38225e-15	0.354284	0.623	0.521	5.88965e-11
Pde2a	2.40403e-15	0.254128	0.218	0.131	5.94347e-11
Lmo2	2.92826e-15	0.283776	0.122	0.06	7.23954e-11
Snrk	2.94e-15	0.285163	0.391	0.281	7.26857e-11
Arhgef12	2.96709e-15	0.263919	0.758	0.65	7.33554e-11
Map4k2	3.37126e-15	0.304613	0.23	0.145	8.33476e-11
Tmem204	3.46824e-15	0.268336	0.161	0.088	8.57452e-11
Nampt	3.98255e-15	0.454553	0.21	0.131	9.84607e-11
Zbtb46	4.30166e-15	0.300219	0.185	0.106	1.0635e-10
Slc40a1	4.36886e-15	0.348355	0.157	0.086	1.08011e-10
Cdc42bpb	4.52658e-15	0.264774	0.395	0.283	1.11911e-10
Asap2	4.58037e-15	0.298862	0.358	0.251	1.13241e-10
Atp13a5	4.84735e-15	0.426052	0.474	0.372	1.19841e-10
Slc39a8	5.18087e-15	0.253226	0.105	0.048	1.28087e-10
Nedd4l	5.74128e-15	0.278267	0.567	0.449	1.41942e-10
Pcdh19	6.33106e-15	0.342392	0.192	0.115	1.56523e-10
Ncald	6.49414e-15	0.333657	0.331	0.229	1.60555e-10
Filip1	6.75826e-15	0.293307	0.188	0.11	1.67085e-10
Sh3bp4	6.96278e-15	0.281479	0.212	0.129	1.72141e-10
Sh2d3c	7.44213e-15	0.302744	0.217	0.133	1.83992e-10
Abcc4	8.10587e-15	0.396018	0.243	0.158	2.00401e-10
Spock2	8.11114e-15	0.596864	0.339	0.248	2.00532e-10
Col4a6	8.68561e-15	-0.346494	0.263	0.37	2.14734e-10
Insr	9.76313e-15	0.332662	0.556	0.45	2.41374e-10
Sh3d19	1.01466e-14	-0.358865	0.612	0.666	2.50855e-10
Cap2	1.02572e-14	0.277966	0.265	0.173	2.53588e-10
Aff3	1.10873e-14	-0.340965	0.386	0.483	2.7411e-10
Adgrl2	1.19483e-14	0.472738	0.418	0.327	2.95398e-10
Pde8b	1.37525e-14	0.582676	0.533	0.456	3.40003e-10
Syne1	1.4286e-14	0.257785	0.506	0.383	3.53194e-10
Lgr4	1.45028e-14	-0.382054	0.283	0.375	3.58552e-10
Scarb1	1.53363e-14	0.252115	0.192	0.113	3.7916e-10
Mtcl1	1.55218e-14	0.369479	0.194	0.117	3.83745e-10
Osmr	1.70212e-14	0.278796	0.262	0.17	4.20815e-10
Rundc3b	1.7842e-14	0.434589	0.234	0.152	4.41107e-10
Coro1c	1.80016e-14	0.269202	0.215	0.133	4.45053e-10
Nxpe4	1.85664e-14	0.410718	0.325	0.234	4.59016e-10
Arap2	2.21219e-14	0.280379	0.366	0.263	5.4692e-10
Tgfb2	3.45041e-14	0.28294	0.149	0.082	8.53045e-10
Actn4	3.72696e-14	0.295841	0.436	0.328	9.21415e-10
Lars2	3.89627e-14	0.254304	0.57	0.452	9.63274e-10
Msn	4.04152e-14	0.259121	0.202	0.121	9.99184e-10
Tecpr1	4.55026e-14	0.287807	0.26	0.172	1.12496e-09
Farp1	5.54476e-14	0.303647	0.671	0.566	1.37083e-09
Glis3	6.0655e-14	-0.576031	0.174	0.255	1.49957e-09
Plekhg2	6.16054e-14	0.254292	0.296	0.199	1.52307e-09
Dpp10	6.24665e-14	0.293396	0.481	0.358	1.54436e-09
Tgfbr3	7.06586e-14	-0.307421	0.518	0.602	1.74689e-09
mt-Co2	7.24522e-14	-0.445737	0.153	0.233	1.79124e-09
Magi3	7.79896e-14	0.309614	0.456	0.353	1.92814e-09
mt-Atp6	8.48308e-14	-0.41959	0.169	0.252	2.09727e-09
Arhgap28	9.67253e-14	-0.422578	0.33	0.413	2.39134e-09
Abcc9	1.02694e-13	0.349345	0.274	0.182	2.5389e-09
Sema7a	1.06308e-13	0.291827	0.142	0.077	2.62824e-09
Mrtfb	1.07762e-13	0.304168	0.407	0.306	2.66421e-09
Slc6a6	1.24932e-13	0.686328	0.269	0.19	3.0887e-09
Tpm4	1.3177e-13	0.265122	0.288	0.194	3.25775e-09
Chst11	1.42611e-13	0.32617	0.463	0.367	3.52576e-09
Raph1	1.54455e-13	0.357149	0.471	0.366	3.81858e-09
Cdyl2	1.64694e-13	0.282074	0.256	0.169	4.07173e-09
Spred2	1.7193e-13	0.302695	0.378	0.276	4.25062e-09
Klf2	1.75806e-13	0.344121	0.162	0.094	4.34645e-09
Prkce	2.53892e-13	0.272077	0.505	0.395	6.27698e-09
Ocln	2.56911e-13	0.336257	0.179	0.108	6.3516e-09
Car4	2.63396e-13	0.255006	0.209	0.128	6.51193e-09
Zfhx4	2.8052e-13	-0.337686	0.331	0.422	6.93531e-09
Nuak1	2.87477e-13	0.308333	0.213	0.135	7.10729e-09
Tshz2	3.17553e-13	0.364866	0.662	0.582	7.85087e-09
Glul	3.41055e-13	-0.360398	0.327	0.408	8.4319e-09
Trpc3	3.62829e-13	0.358635	0.312	0.22	8.97022e-09
Piezo1	3.71277e-13	0.267886	0.159	0.091	9.17908e-09
Ica1	4.55281e-13	0.261714	0.199	0.124	1.12559e-08
Tln2	4.94833e-13	-0.380478	0.353	0.428	1.22338e-08
Iqsec1	5.07435e-13	0.264071	0.312	0.219	1.25453e-08
mt-Co3	5.42076e-13	-0.417922	0.214	0.293	1.34018e-08
Samd12	5.53645e-13	0.306471	0.257	0.173	1.36878e-08
Prkd2	5.69521e-13	0.266915	0.188	0.115	1.40803e-08
Stim1	6.23264e-13	-0.4217	0.337	0.409	1.5409e-08
4921539H07Rik	6.26678e-13	-0.345047	0.116	0.189	1.54934e-08
Myh10	6.76751e-13	0.314355	0.261	0.177	1.67313e-08
Fmnl3	6.8336e-13	0.293524	0.217	0.139	1.68947e-08
Sept4	7.11896e-13	0.285596	0.414	0.316	1.76002e-08
Acvrl1	7.31946e-13	0.252885	0.128	0.068	1.80959e-08
Dcbld1	7.81495e-13	0.387145	0.195	0.123	1.93209e-08
Lmbr1	7.87858e-13	0.288074	0.303	0.214	1.94782e-08
Cdk17	9.48112e-13	0.291413	0.423	0.324	2.34402e-08
Pls3	1.01097e-12	0.336665	0.293	0.207	2.49942e-08
Slc31a1	1.04907e-12	0.270525	0.207	0.131	2.59361e-08
Slc22a23	1.04989e-12	-0.323744	0.452	0.533	2.59565e-08
Ust	1.11387e-12	-0.262895	0.447	0.545	2.75382e-08
Tbx2	1.17375e-12	0.272689	0.18	0.109	2.90186e-08
Gja1	1.22919e-12	-0.405927	0.264	0.342	3.03893e-08
Abcc6	1.63111e-12	0.282959	0.133	0.074	4.03259e-08
Slc39a10	1.73691e-12	0.351515	0.292	0.208	4.29415e-08
2900026A02Rik	1.94523e-12	0.250359	0.212	0.136	4.80919e-08
Chn2	1.97378e-12	0.425384	0.26	0.179	4.87978e-08
Adamts9	2.24424e-12	-0.44588	0.275	0.351	5.54843e-08
Slc20a2	2.52128e-12	-0.406089	0.309	0.385	6.23335e-08
Mobp	2.86108e-12	-0.37496	0.401	0.469	7.07345e-08
Slc16a2	2.89513e-12	0.280398	0.195	0.124	7.15763e-08
Ggact	4.34909e-12	-0.366518	0.312	0.386	1.07523e-07
Ube2e2	4.73326e-12	-0.265619	0.727	0.763	1.1702e-07
Ntn1	4.78143e-12	0.319756	0.22	0.145	1.18211e-07
Tspan18	4.80546e-12	0.314274	0.134	0.076	1.18805e-07
Gm48742	5.12058e-12	-0.42564	0.25	0.325	1.26596e-07
Lama4	6.85037e-12	0.310882	0.623	0.527	1.69362e-07
Sgip1	7.59709e-12	0.366963	0.417	0.33	1.87823e-07
Pdk1	8.14326e-12	-0.408234	0.194	0.267	2.01326e-07
Adamts2	9.11612e-12	-0.337884	0.199	0.277	2.25378e-07
Rapgef3	1.01815e-11	0.261911	0.266	0.186	2.51718e-07
Gucy1a2	1.02574e-11	0.388175	0.417	0.33	2.53593e-07
St6galnac3	1.28814e-11	0.355155	0.448	0.358	3.18467e-07
Lin7a	1.38834e-11	0.367814	0.219	0.147	3.43241e-07
Etv6	1.39564e-11	0.294065	0.597	0.495	3.45045e-07
Bmpr2	1.43878e-11	0.277152	0.51	0.412	3.5571e-07
Pdgfra	1.69182e-11	-0.345081	0.282	0.369	4.1827e-07
Maf	1.9637e-11	-0.318156	0.249	0.332	4.85485e-07
Ldlrad3	2.04251e-11	0.274065	0.446	0.35	5.04969e-07
Cdk6	2.4272e-11	0.262009	0.237	0.159	6.00077e-07
Gm36823	2.8733e-11	0.272416	0.119	0.065	7.10365e-07
Igf2	2.98079e-11	-0.334946	0.254	0.33	7.3694e-07
Ly6c1	3.21809e-11	0.251828	0.114	0.062	7.95607e-07
Il34	3.84153e-11	-0.350966	0.413	0.489	9.4974e-07
Ehbp1	4.25169e-11	-0.297544	0.571	0.618	1.05114e-06
Gng2	4.44835e-11	0.359101	0.26	0.184	1.09977e-06
Ppara	4.83886e-11	-0.378948	0.163	0.232	1.19631e-06
Cysltr2	5.23776e-11	0.322691	0.161	0.099	1.29493e-06
Adra1a	5.92938e-11	-0.372918	0.185	0.258	1.46592e-06
Osr1	9.03322e-11	-0.325461	0.095	0.156	2.23328e-06
Chn1	1.07766e-10	0.289559	0.345	0.26	2.6643e-06
Hspg2	1.08299e-10	0.258552	0.275	0.194	2.67748e-06
Egfr	1.13534e-10	-0.367582	0.325	0.398	2.80691e-06
Prom1	1.41283e-10	0.281037	0.158	0.099	3.49295e-06
Grm7	1.45864e-10	0.433126	0.547	0.465	3.60619e-06
Fmod	1.563e-10	-0.27415	0.092	0.152	3.86422e-06
Plxdc1	1.64592e-10	0.252035	0.195	0.127	4.0692e-06
Igf1r	1.94285e-10	0.408176	0.774	0.709	4.80331e-06
Ampd3	2.11497e-10	-0.377125	0.222	0.292	5.22884e-06
Arhgef28	2.3169e-10	0.301759	0.208	0.142	5.72808e-06
Kcnt2	2.52489e-10	-0.37976	0.307	0.38	6.24227e-06
Ror2	2.81668e-10	-0.282584	0.251	0.33	6.96368e-06
Arnt2	2.97729e-10	-0.3489	0.306	0.377	7.36076e-06
Pgrmc1	3.34858e-10	-0.323405	0.106	0.165	8.2787e-06
Rbfox1	3.45344e-10	-0.477502	0.708	0.718	8.53795e-06
Mast4	4.13101e-10	0.305297	0.782	0.736	1.02131e-05
Crim1	5.92097e-10	0.286769	0.398	0.312	1.46384e-05
Kdm5d	7.72122e-10	-0.301005	0.07	0.12	1.90892e-05
Angpt1	8.39444e-10	-0.395865	0.161	0.225	2.07536e-05
Gria3	8.9062e-10	-0.377142	0.287	0.352	2.20188e-05
Caln1	9.95567e-10	0.268813	0.21	0.143	2.46134e-05
Slc22a4	1.59241e-09	-0.264236	0.108	0.168	3.93692e-05
Trpc6	1.64753e-09	0.349127	0.119	0.07	4.07318e-05
Scara5	1.6871e-09	-0.321075	0.059	0.107	4.17102e-05
Cyp7b1	1.69167e-09	-0.353955	0.227	0.294	4.18232e-05
Tbx3os1	1.89193e-09	0.357107	0.306	0.231	4.67741e-05
Nkain2	1.91667e-09	-0.322272	0.728	0.745	4.73858e-05
Carmn	2.17423e-09	0.311497	0.243	0.176	5.37536e-05
Slco3a1	2.2734e-09	0.36383	0.349	0.276	5.62052e-05
Lef1	2.66222e-09	0.338148	0.444	0.372	6.58181e-05
Gm27151	2.70418e-09	-0.290103	0.159	0.224	6.68555e-05
Frmd4b	2.71274e-09	0.346793	0.454	0.385	6.7067e-05
Rasal2	2.76845e-09	0.265555	0.53	0.442	6.84445e-05
Nrp1	2.79552e-09	0.273067	0.397	0.312	6.91137e-05
Mpzl1	2.91689e-09	0.281019	0.319	0.244	7.21144e-05
Smad7	3.63286e-09	0.281131	0.252	0.182	8.98152e-05
Txnip	3.79451e-09	-0.32402	0.118	0.174	9.38118e-05
Slco1a4	4.29257e-09	0.630981	0.282	0.222	0.000106125
Fign	4.78671e-09	-0.349817	0.249	0.314	0.000118342
Mbnl1	5.1595e-09	0.262422	0.445	0.363	0.000127558
Samd4	5.82647e-09	-0.385423	0.397	0.454	0.000144048
Aspa	6.97926e-09	-0.270458	0.173	0.236	0.000172548
Efemp1	8.51736e-09	-0.301448	0.09	0.141	0.000210575
Pakap	9.52731e-09	0.307827	0.251	0.184	0.000235544
Il31ra	1.03336e-08	-0.436645	0.092	0.143	0.000255478
Flrt2	1.24333e-08	-0.309423	0.421	0.494	0.000307388
Eln	1.29969e-08	-0.44186	0.14	0.199	0.000321323
Tmem44	1.40971e-08	0.252531	0.2	0.14	0.000348523
Cpeb2	1.42516e-08	-0.339598	0.311	0.373	0.000352343
Postn	1.45575e-08	-0.276829	0.061	0.105	0.000359906
Prkca	1.4634e-08	-0.302512	0.464	0.51	0.000361797
Nkd1	1.58159e-08	0.261866	0.286	0.215	0.000391016
Trabd2b	1.75285e-08	-0.271548	0.287	0.356	0.000433358
Lncpint	1.88019e-08	-0.268038	0.357	0.429	0.00046484
Tmsb4x	2.12515e-08	0.289319	0.265	0.199	0.000525402
Mgat4c	2.3208e-08	-0.468185	0.338	0.391	0.000573771
Col22a1	2.38141e-08	-0.320141	0.06	0.104	0.000588756
Errfi1	2.6569e-08	-0.37025	0.196	0.256	0.000656866
Stox2	2.80782e-08	0.396307	0.454	0.386	0.000694177
Gpc6	2.8147e-08	-0.253348	0.68	0.732	0.000695879
Slc5a5	2.97298e-08	-0.252088	0.08	0.128	0.000735009
Daam2	3.38194e-08	0.319401	0.324	0.256	0.000836116
Sncaip	4.40262e-08	-0.265215	0.314	0.382	0.00108846
Gm6209	4.76223e-08	-0.298101	0.118	0.171	0.00117737
St3gal6	4.88107e-08	0.317654	0.333	0.269	0.00120675
Grm3	6.0297e-08	0.282886	0.459	0.389	0.00149072
Fmo1	6.87166e-08	-0.29226	0.179	0.236	0.00169888
Cacnb2	6.96556e-08	0.292852	0.365	0.292	0.00172209
Prdm5	7.16294e-08	-0.304701	0.355	0.406	0.00177089
Mro	8.0417e-08	-0.267298	0.096	0.143	0.00198815
Prdm6	8.17684e-08	-0.32208	0.215	0.279	0.00202156
Apcdd1	8.20765e-08	0.289841	0.484	0.413	0.00202918
Gm33906	1.00635e-07	-0.276347	0.144	0.201	0.00248801
Pde3a	1.28558e-07	0.297705	0.277	0.213	0.00317835
Sema3a	1.29087e-07	-0.351766	0.214	0.272	0.00319143
Abat	1.33953e-07	-0.284014	0.212	0.272	0.00331171
Sntb1	1.53524e-07	0.277672	0.252	0.191	0.00379557
Mark1	1.53697e-07	0.260685	0.27	0.207	0.00379986
Fat4	1.96674e-07	-0.32268	0.228	0.281	0.00486238
Frmd5	2.1525e-07	0.437299	0.369	0.304	0.00532164
Deptor	4.27186e-07	-0.299753	0.161	0.214	0.0105613
Enpp2	4.2778e-07	-0.25265	0.428	0.482	0.010576
Arhgap18	7.68514e-07	0.317937	0.306	0.246	0.019
Arhgap42	1.0013e-06	0.309904	0.514	0.465	0.0247552
Aff2	1.01482e-06	-0.280256	0.13	0.179	0.0250893
Hs3st3a1	1.05655e-06	-0.271277	0.088	0.13	0.0261211
6530403H02Rik	1.07277e-06	-0.333099	0.072	0.111	0.0265222
5031425E22Rik	1.16332e-06	-0.262895	0.398	0.437	0.0287608
Rab30	1.21247e-06	-0.275602	0.339	0.39	0.0299759
Ppp2r3a	1.26374e-06	-0.272372	0.374	0.415	0.0312435
Gm5089	1.30814e-06	-0.294408	0.2	0.25	0.0323411
Vamp5	1.3431e-06	-0.26549	0.219	0.272	0.0332054
mt-Nd2	1.43619e-06	-0.260627	0.081	0.121	0.035507
Thsd7a	1.46028e-06	0.26903	0.274	0.216	0.0361026
Agmo	1.54959e-06	-0.325042	0.25	0.301	0.0383105
Ppp1r13b	2.25163e-06	0.289071	0.302	0.246	0.055667
mt-Cytb	2.53039e-06	-0.252636	0.107	0.151	0.0625589
Krit1	3.18497e-06	-0.251592	0.423	0.457	0.078742
Fgd4	3.25007e-06	-0.258086	0.197	0.245	0.0803515
Pard6g	3.38662e-06	-0.250582	0.289	0.34	0.0837273
Aifm3	3.57729e-06	-0.25809	0.225	0.281	0.0884413
Sox5	3.80874e-06	0.337293	0.531	0.489	0.0941634
Unc5c	4.13381e-06	-0.275664	0.365	0.411	0.1022
Col1a1	4.14682e-06	-0.28997	0.258	0.314	0.102522
Eva1c	6.06633e-06	-0.255442	0.2	0.249	0.149978
Epha3	6.71612e-06	-0.278609	0.167	0.214	0.166043
Dlc1	8.85888e-06	0.349084	0.884	0.859	0.219018
Gpr137c	1.36768e-05	-0.257887	0.135	0.175	0.338131
C430049B03Rik	1.78336e-05	-0.397927	0.158	0.197	0.440899
Plce1	2.71705e-05	0.331882	0.397	0.353	0.671737
Itga9	3.3083e-05	-0.28106	0.164	0.205	0.81791
9630013A20Rik	3.40873e-05	-0.278565	0.278	0.317	0.842739
Gramd1b	3.751e-05	-0.379733	0.226	0.263	0.927359
Inpp4b	5.54576e-05	0.316704	0.446	0.399	1
Cacnb4	0.000164613	-0.345377	0.222	0.254	1
St18	0.000187574	-0.284678	0.272	0.305	1
Mog	0.000242749	-0.27299	0.18	0.213	1
Arhgap24	0.000271684	-0.260852	0.435	0.467	1
Robo2	0.000282304	-0.276016	0.335	0.372	1
Ndnf	0.000384742	-0.342703	0.155	0.189	1
Gm17167	0.000474066	-0.255898	0.295	0.323	1
Sgk1	0.000572532	-0.251981	0.202	0.236	1
Pdgfrb	0.00076543	0.251351	0.514	0.487	1
Creb5	0.000817103	-0.275681	0.197	0.227	1
Kcnma1	0.00794309	-0.271932	0.305	0.319	1
Ppp2r2b	0.0590864	-0.371654	0.322	0.324	1
Runx2	0.0822785	-0.303992	0.121	0.103	1
Cxcl12	0.0978569	0.398819	0.267	0.249	1
Hbb-bs	0.129222	0.407316	0.088	0.102	1
Asic2	0.246883	-0.321049	0.391	0.386	1
